# Supplementary material for: Hydrogenation of sulfoxides to sulfides mediated by incomplete cubane-type Mo3S4 clusters: synthetic applications and mechanistic insights
Source: Royal Society of Chemistry journal article supplement (doi:10.1039/d4cy00987h), 2024-01-01
Supplement: d4cy00987h1.pdf [file d4cy00987h1.pdf]

## Supporting Information

### Hydrogenation of sulfoxides to sulfides mediated by incomplete cubane-type Mo<sub>3</sub>S<sub>4</sub> clusters: synthetic applications and mechanistic insights

*Juanjo Mateu-Campos,<sup>a</sup> María Gutiérrez-Blanco,<sup>a</sup> Eva Guillamón,<sup>a</sup> Vicente S. Safont<sup>a</sup> and Rosa Llusar,<sup>\*a</sup>*

<sup>a</sup> Departament de Química Física i Analítica, Universitat Jaume I. Av. Sos Baynat s/n, 12071 Castelló de la Plana, Spain

#### Table of contents

|                                                                                    |           |
|------------------------------------------------------------------------------------|-----------|
| <b>1. Materials and methods.....</b>                                               | <b>2</b>  |
| <b>2. General procedures for the catalytic reactions.....</b>                      | <b>2</b>  |
| <b>3. Conditions optimization for the hydrogenation of diphenyl sulfoxide.....</b> | <b>3</b>  |
| <b>4. Cluster monitoring .....</b>                                                 | <b>5</b>  |
| <b>5. Recycling experiments .....</b>                                              | <b>5</b>  |
| <b>6. Synthesis of sulfoxides.....</b>                                             | <b>6</b>  |
| <b>7. Characterization data of isolated compounds .....</b>                        | <b>10</b> |
| <b>8. <sup>1</sup>H and <sup>13</sup>C NMR spectra of isolated compounds.....</b>  | <b>15</b> |
| <b>9. Mechanistic experiments .....</b>                                            | <b>36</b> |
| <b>10. Computational details .....</b>                                             | <b>36</b> |
| <b>11. References .....</b>                                                        | <b>75</b> |

## 1. Materials and methods

All reactions were performed under free atmosphere, unless otherwise stated. Cluster complexes employed in this work were prepared according to the published procedures. All other reagents were obtained from commercial sources and used as received or prepared according to the literature.

Elemental analyses were performed with a Euro EA 3000 Elemental Analyzer. Mass spectra were registered in a QTOF Premier instrument operated in the V-mode at a resolution of *ca.* 10000 (FWHM) equipped with an orthogonal Z-spray-electrospray interface (Waters, Manchester, UK). The temperature of the source block was set to 100 °C, and the desolvation temperature was set to 120 °C. A capillary voltage of 3.3 kV was used in the positive scan mode, and the cone voltage was set to  $U_c = 20$  V. Sample solutions in CH<sub>3</sub>CN or CH<sub>3</sub>OH (0.1 % formic acid for organic compounds) were injected with a syringe pump directly connected to the ESI source at a flow rate of 10  $\mu\text{Lmin}^{-1}$ . The observed isotopic pattern of each compound perfectly matched the theoretical isotope pattern calculated from their elemental composition by using the MassLynx 4.1 program.<sup>[1]</sup> <sup>1</sup>H, <sup>13</sup>C and <sup>19</sup>F NMR spectra were recorded on a Bruker Avance III HD 300 MHz or 400 MHz spectrometer. Gas chromatography analyses were performed on an Agilent 7820A GC System equipped with a FID and a capillary column Agilent (HP-5, 30m x 0.32mm x 0.25  $\mu\text{m}$ ). The GC yields were determined by GC-FID using *n*-hexadecane as an internal standard.

## 2. General procedures for the catalytic reactions

### 2.1. General procedure for the catalytic hydrogenation of sulfoxides (0.1 mmol). General procedure A:

A 4 mL glass vial containing a stirring bar was charged with the molybdenum catalyst (0.0050 mmol of [Mo<sub>3</sub>S<sub>4</sub>Cl<sub>3</sub>(dmen)<sub>3</sub>]Cl), sulfoxide (0.1 mmol), internal standard (20  $\mu\text{L}$  of hexadecane) and 3 mL of CH<sub>3</sub>CN. Afterwards, the reaction vial was capped with a septum equipped with a syringe and set in the alloy plate and then introduced into a 300 mL autoclave. Once sealed, the autoclave was purged three times with 20 bar of hydrogen, then pressurized to 6 bar of hydrogen and placed into an aluminium block preheated at 50 °C. After 12 h, the autoclave was cooled to room temperature and the hydrogen was released. Ethyl acetate (2 mL) was then added, and a sample was taken to be analyzed by GC.

### 2.2. General procedure for the catalytic hydrogenation of sulfoxides (0.3 mmol). General procedure B:

A 8 mL glass vial containing a stirring bar was charged with the molybdenum catalyst (0.0050 mmol of  $[\text{Mo}_3\text{S}_4\text{Cl}_3(\text{dmen})_3]\text{Cl}$ ), sulfoxide (0.3 mmol) and 6 mL of  $\text{CH}_3\text{CN}$ . Afterwards, the reaction vial was capped with a septum equipped with a syringe and set in the alloy plate and then introduced into a 300 mL autoclave. Once sealed, the autoclave was purged three times with 20 bar of hydrogen, then pressurized to 6 bar of hydrogen and placed into an aluminium block preheated at 50 °C. After 18 h, the autoclave was cooled to room temperature and the hydrogen was released. To determine the isolated yields of the sulfide product, after completion of the reaction the mixture was taken to dryness and purified by flash silica gel chromatography (pentane/ethyl acetate mixtures) to give the corresponding pure product.

### 3. Conditions optimization for the hydrogenation of diphenyl sulfoxide

**Table S1.**  
the solvent

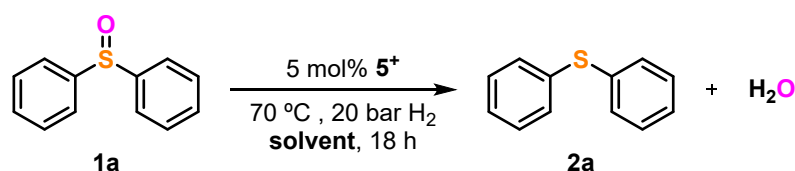

hydrogenation of diphenyl sulfoxide (**1**)<sup>[a]</sup>

| Entry | Solvent                | Conversion (%) <sup>[b]</sup> | Yield (%) <sup>[b]</sup> |
|-------|------------------------|-------------------------------|--------------------------|
| 1     | $\text{CH}_3\text{CN}$ | >99                           | >99                      |
| 2     | $\text{H}_2\text{O}$   | 23                            | 19                       |
| 3     | Triglyme               | 28                            | 14                       |
| 4     | Glycerol               | 10                            | 8                        |
| 5     | Propylene carbonate    | 49                            | 45                       |
| 6     | $\text{CH}_3\text{OH}$ | 57                            | 56                       |

<sup>[a]</sup> Reaction conditions: diphenyl sulfoxide (0.1 mmol), catalyst (5 mol%), 70 °C,  $\text{H}_2$  pressure (20 bar), solvent (3 mL), 18 h. <sup>[b]</sup> Determined by GC using hexadecane as an internal standard.

**Table S2.**  
the  
pressure in

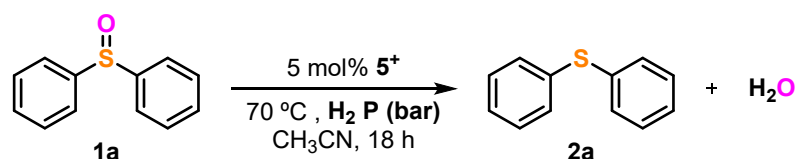

hydrogenation of diphenyl sulfoxide (**1**)<sup>[a]</sup>

| Entry | H <sub>2</sub> Pressure (bar) | Conversion (%) <sup>[b]</sup> | Yield (%) <sup>[b]</sup> |
|-------|-------------------------------|-------------------------------|--------------------------|
| 1     | 20                            | >99                           | >99                      |
| 2     | 10                            | >99                           | >99                      |
| 3     | 6                             | >99                           | >99                      |
| 4     | 1-2                           | 15                            | 10                       |

<sup>[a]</sup> Reaction conditions: diphenyl sulfoxide (0.1 mmol), catalyst (5 mol %), 70 °C, H<sub>2</sub> pressure, CH<sub>3</sub>CN (3 mL), 18 h. <sup>[b]</sup> Determined by GC using hexadecane as an internal standard.

**Table S3.**

the  
in the

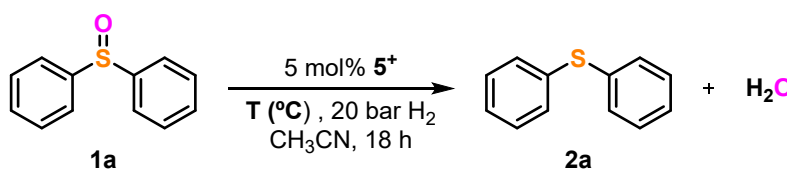

hydrogenation of diphenyl sulfoxide (1)<sup>[a]</sup>

| Entry | Temperature (°C) | Conversion (%) <sup>[b]</sup> | Yield (%) <sup>[b]</sup> |
|-------|------------------|-------------------------------|--------------------------|
| 1     | 70               | >99                           | >99                      |
| 2     | 60               | >99                           | >99                      |
| 3     | 50               | >99                           | >99                      |
| 4     | 40               | 75                            | 73                       |

<sup>[a]</sup> Reaction conditions: diphenyl sulfoxide (0.1 mmol), catalyst (5 mol %), T (°C), 6 bar H<sub>2</sub>, CH<sub>3</sub>CN (3 mL), 18 h. <sup>[b]</sup> Determined by GC using hexadecane as an internal standard.

**Table S4.**

the catalyst  
the

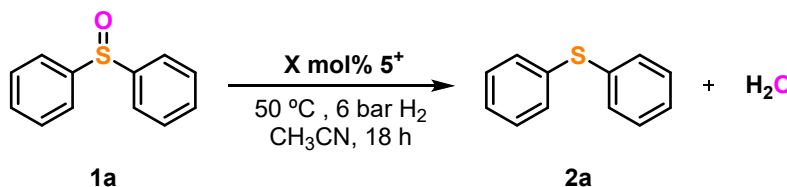

hydrogenation of diphenyl sulfoxide (1)<sup>[a]</sup>

| Entry | X mol % | Conversion (%) <sup>[b]</sup> | Yield (%) <sup>[b]</sup> |
|-------|---------|-------------------------------|--------------------------|
| 1     | 0       | 3                             | 0                        |
| 2     | 1       | 19                            | 14                       |
| 3     | 3       | 72                            | 72                       |
| 4     | 5       | >99                           | >99                      |

<sup>[a]</sup> Reaction conditions: diphenyl sulfoxide (0.1 mmol), catalyst (X mol %), 70 °C, 6 bar H<sub>2</sub>, CH<sub>3</sub>CN (3 mL), 18 h. <sup>[b]</sup> Determined by GC using hexadecane as an internal standard.

#### 4. Cluster monitoring

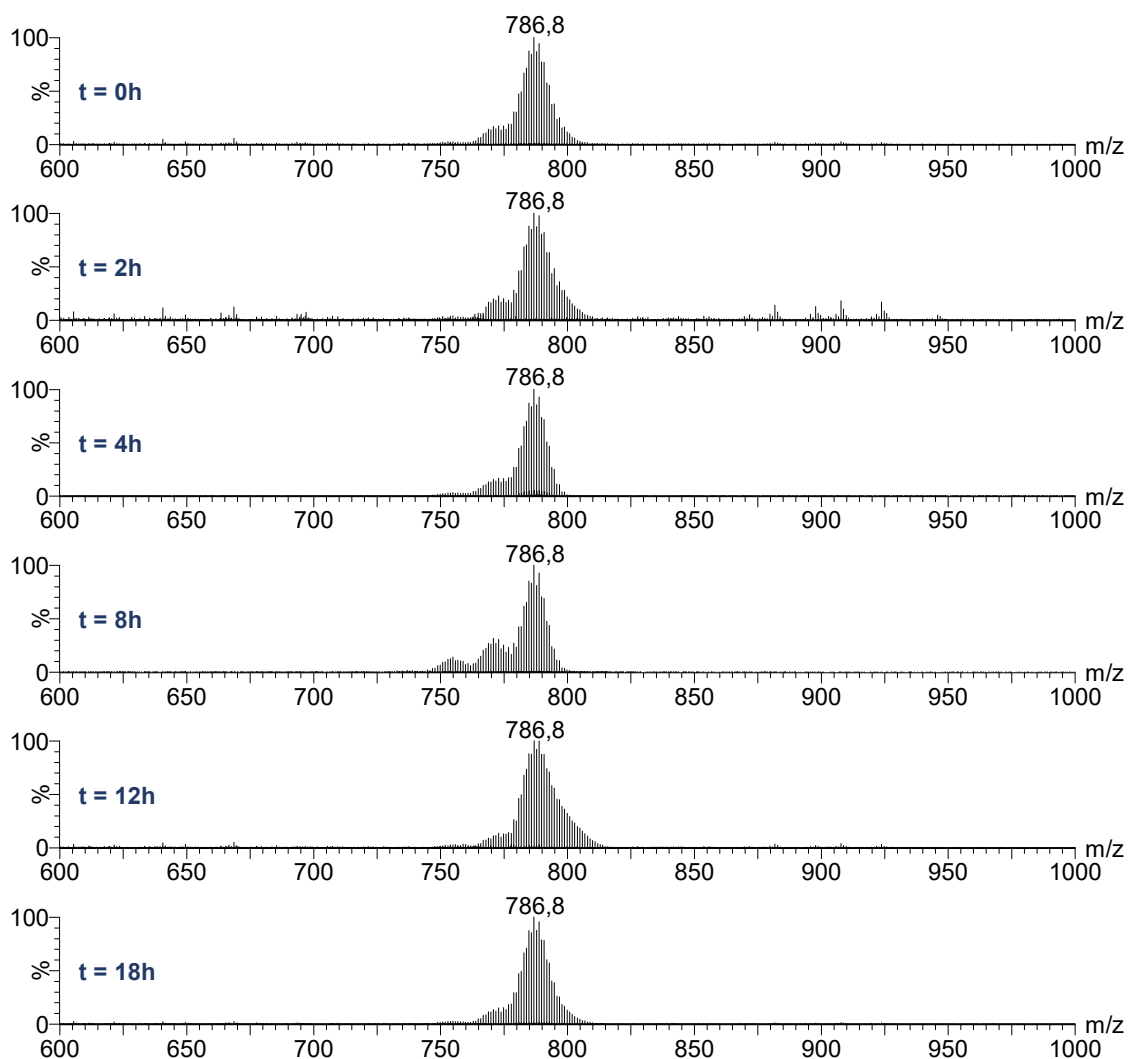

**Figure S1.** HRMS (ESI-TOF) spectra of catalyst **5**<sup>+</sup> after diphenyl sulfoxide hydrogenation at different times. Spectra registered from different batch experiments at 20 V in CH<sub>3</sub>CN.

#### 5. Recycling experiments

Recycling experiments were performed by successive additions of diphenyl sulfoxide to the reaction mixture. After the fifth run, the reaction crude was concentrated under reduced pressure and the solid residue was washed three times with 5 mL of ethyl acetate and dried under vacuum. After that, the solid sample was analyzed by HRMS spectrometry and <sup>1</sup>H-NMR spectroscopy to confirm the integrity of the cluster catalyst.

Recycling experiments were also conducted by sample evaporation. Then, 5 mL of ethyl acetate were added to remove organics and the catalyst was dried under vacuum. Finally, the catalyst was redissolved in acetonitrile and the mixture was transferred to the reaction vial with diphenyl sulfoxide for the next run.

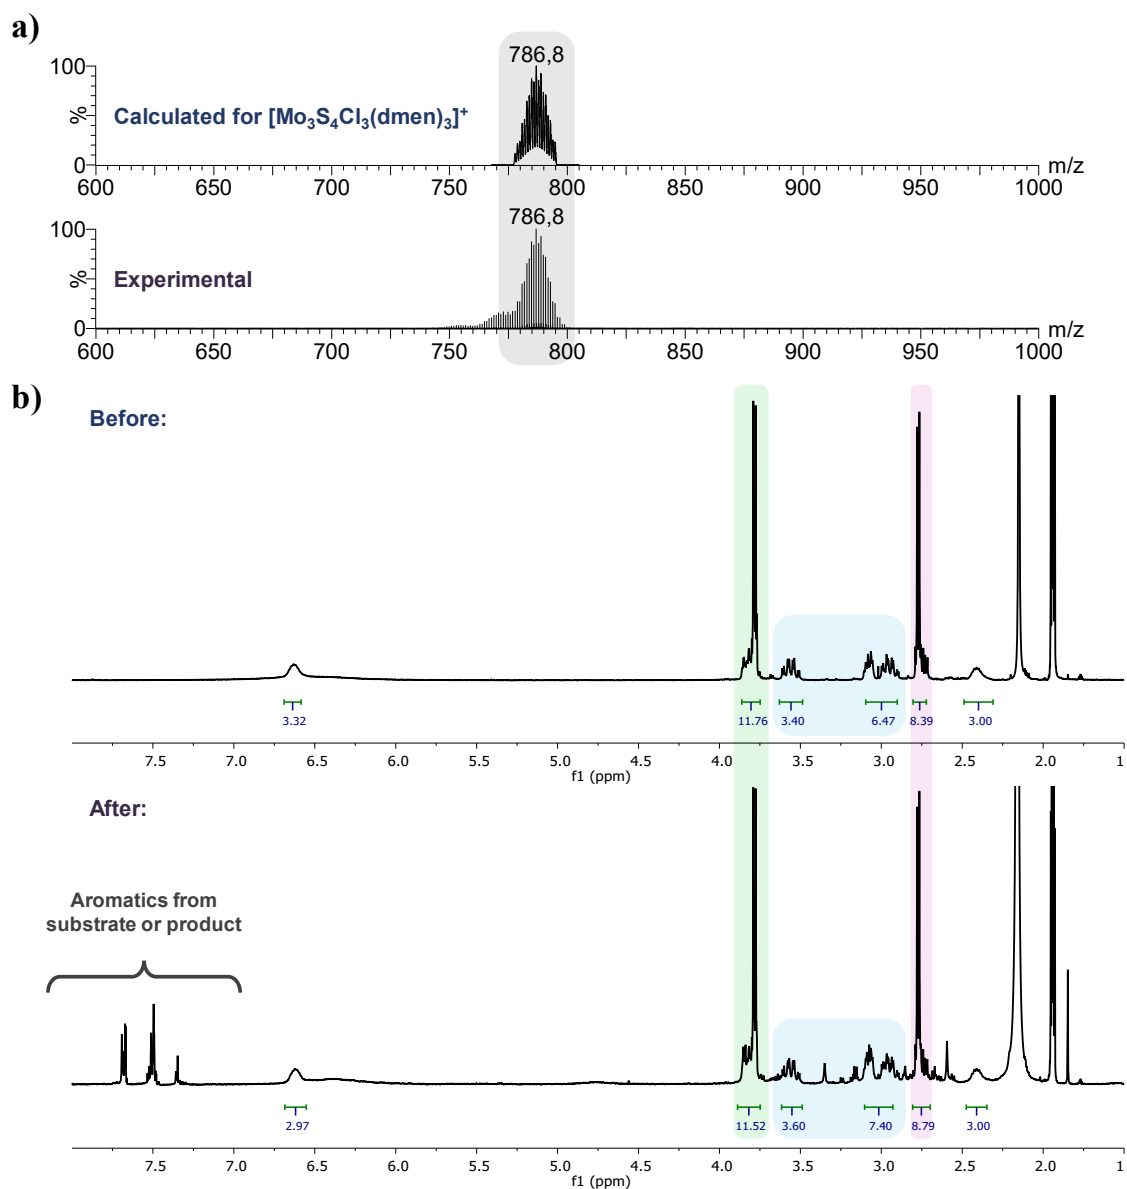

**Figure S2.** HRMS (ESI-TOF) spectrum of catalyst  $5^+$  after recycling experiments. Spectrum registered at 20 V in  $\text{CH}_3\text{CN}$  (a).  $^1\text{H-NMR}$  (400 MHz,  $\text{CD}_3\text{CN}$ ) spectra of catalyst  $5^+$  before and after recycling experiments.

## 6. Synthesis of sulfoxides

### 6.1 Synthesis of diaryl sulfoxides

#### Bis(4-trifluoromethylphenyl) sulfoxide (**1d**)

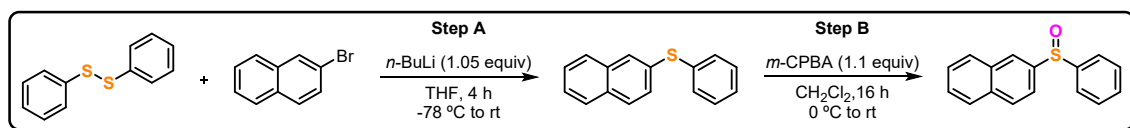

**Step A:** The synthesis of this compound was adapted from the literature.<sup>[2]</sup> A mixture of 4-trifluoromethylbenzenethiol (0.95 g, 5 mmol), 4-iodobenzotrifluoride (1.43 g, 5 mmol), *n*-Bu<sub>4</sub>NBr (0.18 g, 0.5 mmol) and NaOH (0.43 g, 10 mmol) and CuI (110.3 mg, 0.5 mmol) in toluene (6 mL) was stirred under reflux for 72 h. The reaction mixture was allowed to reach room temperature, then 10 mL of NH<sub>4</sub>Cl (sat. aqueous solution) were added. The aqueous phase was separated and extracted with EtOAc (3 x 10 mL), the combined organic phase was dried over anhydrous Na<sub>2</sub>SO<sub>4</sub> and concentrated under reduced pressure. The residue was purified by column chromatography on silica gel (Hexane) to give the corresponding sulfide as a white solid (520.0 mg, 31%). <sup>1</sup>H-NMR (300 MHz, CDCl<sub>3</sub>): δ = 7.62(d, J = 9.0 Hz, 4H), 6.48 (d, J = 9.0 Hz, 4H). <sup>13</sup>C-NMR (75 MHz, CDCl<sub>3</sub>): δ = 139.7, 131.1, 129.9 (q, J = 37.5 Hz), 125.8 (q, J = 3.7 Hz), 122.7 (q, J = 270.1 Hz). <sup>19</sup>F-NMR (282 MHz, CDCl<sub>3</sub>): δ = -62.8.

**Step B:** To a solution of bis(4-(trifluoromethyl)phenyl)sulfide (404.0 mg, 1.25 mmol) in CH<sub>2</sub>Cl<sub>2</sub> (2 mL) was added *m*-CPBA (300.9 mg, 1.38 mmol) slowly at 0 °C and the mixture was stirred at this temperature for 4 h. Then the mixture was warmed to room temperature and stirred overnight. After that, the mixture was quenched with 4 mL of NaHCO<sub>3</sub> (sat. aqueous solution). The aqueous layer was then extracted with CH<sub>2</sub>Cl<sub>2</sub> (3x10 mL). The combined organic phase was washed with brine, dried over anhydrous Na<sub>2</sub>SO<sub>4</sub> and concentrated under reduced pressure. The residue was purified by column chromatography on silica gel (Hexane:EtOAc = 9:1) to give the title compound **1d** as a white solid. (192.1 mg, 45%). <sup>1</sup>H-NMR (300 MHz, CDCl<sub>3</sub>): δ = 7.71(d, J = 8.8 Hz, 4H), 6.57 (d, J = 8.8 Hz, 4H). <sup>13</sup>C-NMR (75 MHz, CDCl<sub>3</sub>): δ = 144.5, 137.4, 134.0 (q, J = 32.4 Hz), 130.8 (q, J = 3.8 Hz), 128.7 (q, J = 270.2 Hz). <sup>19</sup>F-NMR (282 MHz, CDCl<sub>3</sub>): δ = -63.0.

### 3-(phenylsulfinyl)pyridine (**1l**)

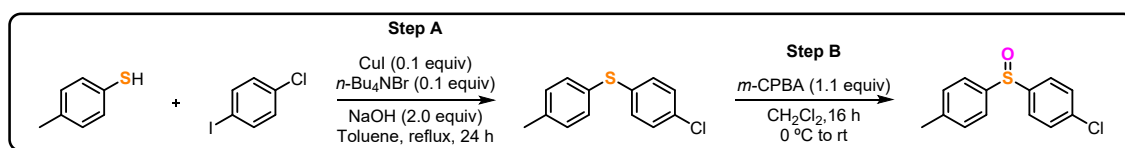

**Step A:** The synthesis of this compound was adapted from the literature.<sup>[3]</sup> A mixture of 3-bromopyridine (960 mg, 6.0 mmol), K<sub>2</sub>CO<sub>3</sub> (1.61 g, 12.0 mmol) and thiophenol (650.0 mg, 6.0 mmol) in DMSO (4 mL) was stirred at 110 °C for 72 h in a screw-capped tube. The reaction mixture was allowed to reach room temperature, then CH<sub>2</sub>Cl<sub>2</sub> (5 mL) and H<sub>2</sub>O (10 mL) were added. The aqueous phase was separated and extracted with CH<sub>2</sub>Cl<sub>2</sub> (3 x 5 mL), the combined organic phase was washed with H<sub>2</sub>O (3 x 5 mL), dried over anhydrous Na<sub>2</sub>SO<sub>4</sub> and concentrated under reduced pressure. The residue was purified by column chromatography on silica gel (Hexane:EtOAc = 9:1) to give the corresponding sulfide as a brown liquid (520.0 mg, 47%). <sup>1</sup>H-



**NMR** (300 MHz, CDCl<sub>3</sub>):  $\delta$  = 8.56 (m, 1H), 8.45 (d, J = 4.4 Hz, 1H), 7.59 (d, J = 8.0 Hz, 1H), 7.39-7.28 (m, 5H), 7.22-7.18 (m, 1H). **<sup>13</sup>C-NMR** (75 MHz, CDCl<sub>3</sub>):  $\delta$  = 151.17, 147.96, 138.00, 134.05, 133.72, 131.86, 129.61, 127.96, 123.99.

**Step B:** To a solution of 3-phenylthiopyridine (220.0 mg, 1.17 mmol) in CH<sub>2</sub>Cl<sub>2</sub> (2 mL) was added *m*-CPBA (279.6 mg, 1.29) slowly at 0 °C and the mixture was stirred at this temperature for 4 h. Then the mixture was warmed to room temperature and stirred overnight. After that, the mixture was quenched with 4 mL of NaHCO<sub>3</sub> (sat. aqueous solution). The aqueous layer was then extracted with CH<sub>2</sub>Cl<sub>2</sub> (3×10 mL). The combined organic phase was washed with brine, dried over anhydrous Na<sub>2</sub>SO<sub>4</sub> and concentrated under reduced pressure. The residue was purified by column chromatography on silica gel (Hexane:EtOAc = 9:1) to give the title compound **11** as a white solid. (187.5 mg, 79%). **<sup>1</sup>H-NMR** (300 MHz, CDCl<sub>3</sub>):  $\delta$  = 8.78 (d, J = 1.7 Hz, 1H), 8.66 (dd, J = 4.8 Hz, J = 1.6 Hz, 1H), 8.00-7.96 (m, 1H), 7.68-7.64 (m, 2H), 7.51-7.47 (m, 3H), 7.42-7.37 (m, 1H). **<sup>13</sup>C-NMR** (75 MHz, CDCl<sub>3</sub>):  $\delta$  = 151.98, 146.47, 144.60, 142.44, 132.44, 131.65, 129.67, 124.69, 124.30.

## 2-(phenylsulfinyl)naphthalene (1m)

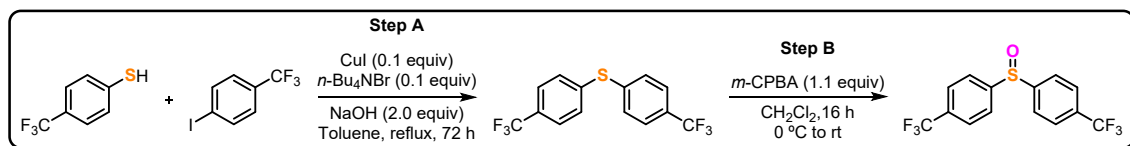

**Step A:** The synthesis of this compound was adapted from the literature.<sup>[2]</sup> To a solution of 2-bromonaphthalene (1.13 g, 5.0 mmol) in THF (28 mL) was added *n*-BuLi (2.5 M in hexane, 2.1 mL, 5.25 mmol) at -78 °C. The mixture was stirred for 30 min, then to a solution of phenyl disulfide (1.22 g, 5.0 mmol) in THF (10 mL) was added dropwise. After stirring for 30 min, the mixture was warmed to 0 °C and stirred for 1 h, then warmed to room temperature and stirred for 2.5 h. After that, the mixture was taken to dryness and the crude residue was dissolved in CH<sub>2</sub>Cl<sub>2</sub> (20 mL) and washed with brine. The aqueous layer was washed with CH<sub>2</sub>Cl<sub>2</sub> (20 mL) and the combined organic layers were dried over anhydrous Na<sub>2</sub>SO<sub>4</sub> and concentrated in vacuo. The residue was purified by column chromatography on silica gel (Hexane) to give the corresponding sulfide as a white solid (270.0 mg, 23%). **<sup>1</sup>H-NMR** (300 MHz, CDCl<sub>3</sub>):  $\delta$  = 8.00 (s, 1H), 7.92-7.81 (m, 3H), 7.59-7.53 (m, 5H), 7.45-7.37 (m, 3H). **<sup>13</sup>C-NMR** (75 MHz, CDCl<sub>3</sub>):  $\delta$  = 136.0, 133.8, 133.1, 132.3, 131.0, 129.9, 129.3, 128.9, 128.8, 127.8, 127.5, 127.1, 126.6, 126.2.

**Step B:** To a solution of 2-(phenylthio)naphthalene (270.0 mg, 1.14 mmol) in CH<sub>2</sub>Cl<sub>2</sub> (2 mL) was added *m*-CPBA (278.1 mg, 1.26 mmol) slowly at 0 °C and the mixture was stirred at this temperature for 4 h. Then the mixture was warmed to room temperature and stirred overnight. After that, the mixture was quenched with 4 mL of NaHCO<sub>3</sub> (sat. aqueous solution). The aqueous

layer was then extracted with CH<sub>2</sub>Cl<sub>2</sub> (3×10 mL). The combined organic phase was washed with brine, dried over Na<sub>2</sub>SO<sub>4</sub> and concentrated under reduced pressure. The residue was purified by column chromatography on silica gel (Hexane:EtOAc = 8:2) to give the title compound **1m** as a white solid. (239.3 mg, 83%). <sup>1</sup>H-NMR (300 MHz, CDCl<sub>3</sub>): δ = 8.29 (s, 1H), 7.89-7.65 (m, 5H), 7.50-7.33 (m, 6H). <sup>13</sup>C-NMR (75 MHz, CDCl<sub>3</sub>): δ = 145.3, 142.4, 134.2, 132.6, 130.9, 129.6, 129.2, 128.4, 127.9, 127.7, 125.1, 124.8, 124.8, 120.5.

### Bis(4-trifluoromethylphenyl) sulfoxide (**1n**)

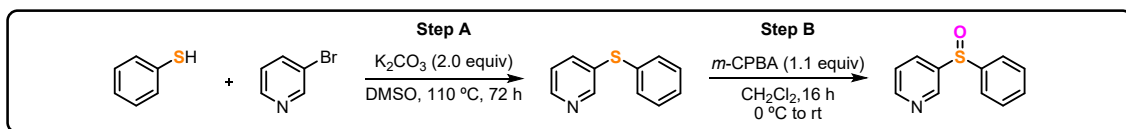

**Step A:** The synthesis of this compound was adapted from the literature.<sup>[2]</sup> A mixture of *p*-toluenethiol (2.03 g, 16 mmol), 1-chloro-4-iodobenzene (3.77 g, 16 mmol), *n*-Bu<sub>4</sub>NBr (0.53 g, 1.60 mmol) and NaOH (1.30 g, 32 mmol) and CuI (324.6 mg, 1.6 mmol) in toluene (11 mL) was stirred under reflux for 24 h. The reaction mixture was allowed to reach room temperature, then 10 mL of NH<sub>4</sub>Cl (sat. aqueous solution) were added. The aqueous phase was separated and extracted with EtOAc (3 x 10 mL), the combined organic phase was dried over anhydrous Na<sub>2</sub>SO<sub>4</sub> and concentrated under reduced pressure. The mixture was recrystallized from ethanol to give the corresponding sulfide as a white solid (1.79 g, 48%). <sup>1</sup>H-NMR (300 MHz, CDCl<sub>3</sub>): δ = 7.28-7.10 (m, 8H), 2.33 (s, 3H). <sup>13</sup>C-NMR (75 MHz, CDCl<sub>3</sub>): δ = 138.1, 136.0, 132.5, 132.3, 130.8, 130.6, 130.2, 129.1, 21.3.

**Step B:** To a solution of (4-chlorophenyl)(*p*-tolyl) sulfide (1.01 g, 4.06 mmol) in CH<sub>2</sub>Cl<sub>2</sub> (15 mL) was added *m*-CPBA (1.05 g, 4.47 mmol) slowly at 0 °C and the mixture was stirred at this temperature for 4 h. Then the mixture was warmed to room temperature and stirred overnight. After that, the mixture was quenched with 10 mL of NaHCO<sub>3</sub> (sat. aqueous solution). The aqueous layer was then extracted with CH<sub>2</sub>Cl<sub>2</sub> (3×10 mL). The combined organic phase was washed with brine, dried over anhydrous Na<sub>2</sub>SO<sub>4</sub> and concentrated under reduced pressure. The residue was purified by column chromatography on silica gel (Hexane:EtOAc = 9:1) to give the title compound **1n** as a white solid. (871.2 mg, 86%). <sup>1</sup>H-NMR (300 MHz, CDCl<sub>3</sub>): δ = 7.86-7.80 (m, 4H), 7.64 (d, J = 9.0 Hz, 2H), 7.50 (d, J = 9.0 Hz, 2H), 2.58 (s, 3H). <sup>13</sup>C-NMR (75 MHz, CDCl<sub>3</sub>): δ = 144.2, 141.8, 141.4, 136.5, 129.7, 129.0, 125.5, 124.4, 20.9.

## 6.2 Synthesis of thioaniso oxide derivatives

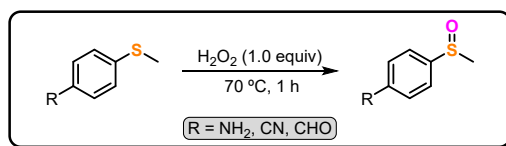

The procedure described in the literature was followed.<sup>[4]</sup> A mixture of the corresponding sulfide (2.0 mmol) and H<sub>2</sub>O<sub>2</sub> 30% (2.0 mmol, 200mL) were vigorously stirred at 70 °C for 1 h. Then the mixture was cooled to room temperature, extracted with CH<sub>2</sub>Cl<sub>2</sub> (3×10 mL), the combined organic phase was dried over anhydrous Na<sub>2</sub>SO<sub>4</sub> concentrated in vacuo. The residue was purified by column chromatography on silica gel to give the corresponding sulfoxide.

#### 4-(methylsulfinyl)aniline (**1t**)

The sulfoxide **1t** was prepared following the procedure for thioanisole oxide derivatives described above (CH<sub>2</sub>Cl<sub>2</sub> to CH<sub>2</sub>Cl<sub>2</sub>:Acetone = 9:1) and it was isolated as a brown solid (279.0 mg, 94%). <sup>1</sup>H-NMR (300 MHz, CDCl<sub>3</sub>): δ = 7.43 (d, J = 8.7 Hz, 2H), 6.73 (d, J = 8.7 Hz, 2H), 4.05 (brs, 2H), 2.66 (s, 3H). <sup>13</sup>C-NMR (75 MHz, CDCl<sub>3</sub>): δ = 149.7, 133.4, 125.8, 115.1, 43.9.

#### 4-methanesulfinylbenzonitrile (**1u**)

The sulfoxide **1u** was prepared following the procedure for thioanisole oxide derivatives described above (Hexane:EtOAc = 2:8) and it was isolated as a white solid (265.1 mg, 78%). <sup>1</sup>H-NMR (300 MHz, CDCl<sub>3</sub>): δ = 7.68 (q, J = 7.9 Hz, 4H), 2.64 (s, 3H). <sup>13</sup>C-NMR (75 MHz, CDCl<sub>3</sub>): δ = 151.2, 132.7, 124.1, 117.5, 114.2, 43.4.

#### 4-methylsulfinylbenzaldehyde (**1v**)

The sulfoxide **1v** was prepared following the procedure for thioanisole oxide derivatives described above (Hexane:EtOAc = 3:7) and it was isolated as a white solid (268.0 mg, 66%). <sup>1</sup>H-NMR (300 MHz, CDCl<sub>3</sub>): δ = 9.84 (s, 1H), 7.80 (d, J = 8.5 Hz, 2H), 7.60 (d, J = 8.3 Hz, 2H), 2.57 (s, 3H). <sup>13</sup>C-NMR (75 MHz, CDCl<sub>3</sub>): δ = 149.7, 133.4, 125.8, 115.1, 43.9.

### 7. Characterization data of isolated compounds

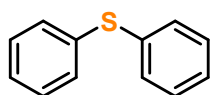

**Diphenyl sulfide (2a).** According to general procedure B, the desired product (**2a**, 52.4 mg, 95%) was isolated as a pale-yellow liquid (Pentane). <sup>1</sup>H-NMR (300 MHz, CD<sub>2</sub>Cl<sub>2</sub>): δ = 7.37-7.24 (m, 10H). <sup>13</sup>C-NMR (75 MHz, CD<sub>2</sub>Cl<sub>2</sub>): δ = 136.4, 131.6, 129.8, 127.7. **HRMS (ESI-TOF) m/z** [M-H]<sup>+</sup> Calc. for C<sub>12</sub>H<sub>11</sub>S: 187.0582. Found: 187.0587. **Elemental analysis** Calc. (%) for C<sub>12</sub>H<sub>10</sub>S: C 77.38, H 5.41, S 17.21. Found: C 76.96, H 5.02, S 17.12.

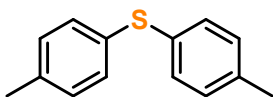

**Bis(4-methylphenyl) sulfide (2b).** According to general procedure B, the desired product (**2b**, 51.2 mg, 80%) was isolated as a white solid (Pentane).  $^1\text{H-NMR}$  (300 MHz,  $\text{CD}_2\text{Cl}_2$ ):  $\delta$  = 7.25 (d,  $J$  = 12.0 Hz, 4H), 7.13 (d,  $J$  = 12.0 Hz, 4H), 2.34 (s, 6H).  $^{13}\text{C-NMR}$  (75 MHz,  $\text{CD}_2\text{Cl}_2$ ):  $\delta$  = 137.7, 133.2, 131.6, 130.5, 21.4. **HRMS (ESI-TOF)**  $m/z$   $[\text{M-H}]^+$  Calc. for  $\text{C}_{14}\text{H}_{15}\text{S}$ : 215.0894. Found: 215.0816. **Elemental analysis** Calc. (%) for  $\text{C}_{14}\text{H}_{14}\text{S}$ : C 78.45, H 6.58, S 14.96. Found: C 78.34, H 6.34, S 14.70.

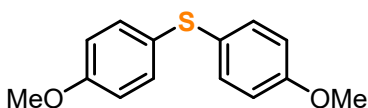

**Bis(4-methoxyphenyl) sulfide (2c).** According to general procedure B, the desired product (**2c**, 76.7 mg, 98%) was isolated as a white solid (Pentane:EtOAc = 9:1).  $^1\text{H-NMR}$  (300 MHz,  $\text{CD}_2\text{Cl}_2$ ):  $\delta$  = 7.32 (d,  $J$  = 9.0 Hz, 4H), 6.87 (d,  $J$  = 9.0 Hz, 4H), 3.79 (s, 6H).  $^{13}\text{C-NMR}$  (75 MHz,  $\text{CD}_2\text{Cl}_2$ ):  $\delta$  = 159.7, 133.3, 128.0, 115.3, 55.9. **HRMS (ESI-TOF)**  $m/z$   $[\text{M-H}]^+$  Calc. for  $\text{C}_{14}\text{H}_{15}\text{SO}_2$ : 247.0793. Found: 247.0795. **Elemental analysis** Calc. (%) for  $\text{C}_{14}\text{H}_{14}\text{SO}_2$ : C 68.26, H 5.73, S 13.02. Found: C 68.75, H 5.81, S 13.22.

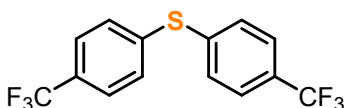

**Bis(4-(trifluoromethyl)phenyl)sulfide (2d).** According to general procedure B, the desired product (**2d**, 89.3 mg, 93%) was isolated as a white solid (Pentane).  $^1\text{H-NMR}$  (300 MHz,  $\text{CD}_2\text{Cl}_2$ ):  $\delta$  = 7.61 (d,  $J$  = 9.0 Hz, 4H), 6.48 (d,  $J$  = 9.0 Hz, 4H).  $^{13}\text{C-NMR}$  (75 MHz,  $\text{CD}_2\text{Cl}_2$ ):  $\delta$  = 140.3, 131.7, 129.6 (q,  $J$  = 37.5 Hz), 126.9 (q,  $J$  = 3.8 Hz), 124.7 (q,  $J$  = 270.0 Hz).  $^{19}\text{F-NMR}$  (282 MHz,  $\text{CD}_2\text{Cl}_2$ ):  $\delta$  = -63.0. **HRMS (ESI-TOF)**  $m/z$   $[\text{M-H}]^+$  Calc. for  $\text{C}_{14}\text{H}_9\text{SF}_6$ : 323.0329. Found: 323.0318. **Elemental analysis** Calc. (%) for  $\text{C}_{14}\text{H}_8\text{SF}_6$ : C 52.18, H 2.50, S 9.95. Found: C 52.18, H 2.71, S 10.09.

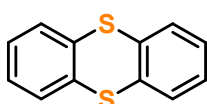

**Thianthrene (2e).** According to general procedure B, the desired product (**2e**, 46.6 mg, 75%) was isolated as a white solid (Pentane).  $^1\text{H-NMR}$  (300 MHz,  $\text{CD}_2\text{Cl}_2$ ):  $\delta$  = 7.52-7.46 (m, 4H), 7.29-7.23 (m, 4H).  $^{13}\text{C-NMR}$  (75 MHz,  $\text{CD}_2\text{Cl}_2$ ):  $\delta$  = 136.1, 129.2, 128.3. **HRMS (ESI-TOF)**  $m/z$   $[\text{M-H}]^+$  Calc. for  $\text{C}_{12}\text{H}_9\text{S}_2$ : 217.0146. Found: 217.0141. **Elemental analysis** Calc. (%) for  $\text{C}_{12}\text{H}_8\text{S}_2$ : C 66.63, H 3.73, S 29.65. Found: C 67.00, H 3.79, S 29.54.

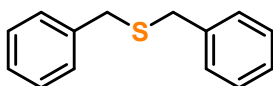

**Bis(4-methoxyphenyl) sulfide (2f).** According to general procedure B, the desired product (**2f**, 56.6 mg, 90%) was isolated as a white solid (Pentane).  $^1\text{H-NMR}$  (300 MHz,  $\text{CD}_2\text{Cl}_2$ ):  $\delta$  = 7.38-7.24 (m, 10H), 3.65 (s, 4H).  $^{13}\text{C-NMR}$  (75 MHz,  $\text{CD}_2\text{Cl}_2$ ):  $\delta$  = 139.0, 129.5, 129.0, 127.5, 36.3. **HRMS (ESI-TOF)**  $m/z$   $[\text{M-H}]^+$  Calc. for  $\text{C}_{14}\text{H}_{15}\text{S}$ : 215.0894. Found: 215.0889. **Elemental analysis** Calc. (%) for  $\text{C}_{14}\text{H}_{14}\text{S}$ : C 78.45, H 6.58, S 14.96. Found: C 77.23, H 6.54, S 14.45.

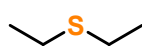 **Diethyl sulfide (2h).** According to general procedure B, the desired product (**2h**, 27.2 mg, 94%) was isolated as a colorless liquid (Pentane). **<sup>1</sup>H-NMR** (300 MHz, CD<sub>2</sub>Cl<sub>2</sub>): δ = 2.53 (q, J = 7.4 Hz, 4H), 1.22 (t, J = 7.4 Hz, 6H). **<sup>13</sup>C-NMR** (75 MHz, CD<sub>2</sub>Cl<sub>2</sub>): δ = 25.9, 15.7. **HRMS (ESI-TOF) *m/z* [M-H]<sup>+</sup>** Calc. for C<sub>4</sub>H<sub>11</sub>S: 91.0581. Found: 91.0579. **Elemental analysis** Calc. (%) for C<sub>4</sub>H<sub>10</sub>S: C 53.27, H 11.18, S 35.55. Found: C 54.12, H 11.13, S 36.75.

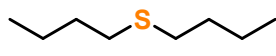 **Dibutyl sulfide (2i).** According to general procedure B, the desired product (**2i**, 44.9 mg, 98%) was isolated as a colorless liquid (Pentane). **<sup>1</sup>H-NMR** (300 MHz, CD<sub>2</sub>Cl<sub>2</sub>): δ = 2.49 (t, J = 7.3 Hz, 4H), 1.55 (m, 4H), 1.40 (m, 4H), 0.91 (t, J = 7.3 Hz, 6H). **<sup>13</sup>C-NMR** (75 MHz, CD<sub>2</sub>Cl<sub>2</sub>): δ = 32.5, 32.3, 22.6, 14.1. **HRMS (ESI-TOF) *m/z* [M-H]<sup>+</sup>** Calc. for C<sub>8</sub>H<sub>19</sub>S: 147.1207. Found: 147.1212. **Elemental analysis** Calc. (%) for C<sub>8</sub>H<sub>18</sub>S: C 65.68, H 12.40, S 21.92. Found: C 67.38, H 11.35, S 20.77.

 **Tetrahydrothiophene (2j).** According to general procedure B, the desired product (**2j**, 25.6 mg, 96%) was isolated as a colorless liquid (Pentane). **<sup>1</sup>H-NMR** (300 MHz, CD<sub>2</sub>Cl<sub>2</sub>): δ = 2.79 (m, 4H), 1.91 (m, 4H). **<sup>13</sup>C-NMR** (75 MHz, CD<sub>2</sub>Cl<sub>2</sub>): δ = 32.2, 31.6. **HRMS (ESI-TOF) *m/z* [M-H]<sup>+</sup>** Calc. for C<sub>4</sub>H<sub>8</sub>S: 89.0425. Found: 89.0264. **Elemental analysis** Calc. (%) for C<sub>4</sub>H<sub>8</sub>S: C 54.49, H 9.15, S 36.37. Found: C 55.47, H 9.73, S 35.98.

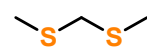 **Bis(methylthio)methane (2k).** According to general procedure B, the desired product (**2k**, 37.2 mg, 92%) was isolated as a colorless liquid (Pentane). **<sup>1</sup>H-NMR** (300 MHz, CD<sub>2</sub>Cl<sub>2</sub>): δ = 3.63 (s, 2H), 2.14 (s, 6H). **<sup>13</sup>C-NMR** (75 MHz, CD<sub>2</sub>Cl<sub>2</sub>): δ = 40.6, 14.7. **HRMS (ESI-TOF) *m/z* [M-H]<sup>+</sup>** Calc. for C<sub>3</sub>H<sub>9</sub>S<sub>2</sub>: 109.0146. Found: 109.0142. **Elemental analysis** Calc. (%) for C<sub>3</sub>H<sub>8</sub>S<sub>2</sub>: C 33.29, H 1.01, S 59.25. Found: C 32.98, H 1.24, S 59.07.

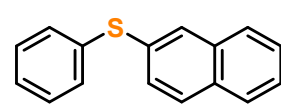 **2-(phenylthio)naphthalene (2l).** According to general procedure B, the desired product (**2l**, 66.3 mg, 92%) was isolated as a white solid (Pentane). **<sup>1</sup>H-NMR** (300 MHz, CD<sub>2</sub>Cl<sub>2</sub>): δ = 7.88-7.75 (m, 4H), 7.54-7.27 (m, 8H). **<sup>13</sup>C-NMR** (75 MHz, CD<sub>2</sub>Cl<sub>2</sub>): δ = 136.3, 134.4, 133.7, 132.9, 131.6, 130.3, 129.8, 129.4, 129.2, 128.3, 127.9, 127.7, 127.2, 126.8. **HRMS (ESI-TOF) *m/z* [M-H]<sup>+</sup>** Calc. for C<sub>16</sub>H<sub>13</sub>S: 237.0738. Found: 237.0745. **Elemental analysis** Calc. (%) for C<sub>16</sub>H<sub>12</sub>S: C 82.05, H 4.94, S 13.53. Found: C 81.31, H 5.12, S 13.57.

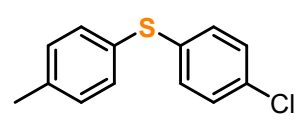 **(4-chlor-phenyl)(*p*-tolyl) sulfide (2m).** According to general procedure B, the desired product (**2m**, 68.7 mg, 97%) was isolated as a white solid (Pentane). **<sup>1</sup>H-NMR** (300 MHz, CD<sub>2</sub>Cl<sub>2</sub>): δ = 7.33-7.17 (m, 8H), 2.36 (s, 3H). **<sup>13</sup>C-NMR** (75 MHz, CD<sub>2</sub>Cl<sub>2</sub>): δ = 138.9, 136.7, 133.1, 132.8, 131.4, 131.2, 130.8, 129.7, 21.4. **HRMS (ESI-TOF) *m/z* [M-H]<sup>+</sup>** Calc. for C<sub>13</sub>H<sub>12</sub>SCl: 235.0348. Found:

235.0341. **Elemental analysis** Calc. (%) for  $C_{13}H_{11}S$ : C 66.52, H 4.72, S 13.66. Found: C 67.11, H 4.67, S 13.61.

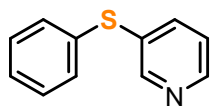

**3-phenylthiopyridine (2n).** According to general procedure B, the desired product (**2n**, 32.3 mg, 55%) was isolated as a yellow oil (Pentane:EtOAc = 9:1).  **$^1H$ -NMR** (300 MHz,  $CD_2Cl_2$ ):  $\delta$  = 8.54 (m, 1H), 8.45 (d,  $J$  = 6.0 Hz, 1H), 7.62 (d,  $J$  = 9.0 Hz, 1H), 7.41-7.30 (m, 5H), 7.25-7.20 (m, 1H).  **$^{13}C$ -NMR** (75 MHz,  $CD_2Cl_2$ ):  $\delta$  = 151.72, 148.52, 138.54, 134.75, 133.91, 132.14, 130.02, 128.32, 124.44. **HRMS (ESI-TOF)**  $m/z$   $[M-H]^+$  Calc. for  $C_{11}H_{10}SN$ : 188.0534. Found: 188.0534. **Elemental analysis** Calc. (%) for  $C_{11}H_9SN$ : C 70.55, H 4.84, S 17.12, N 7.48. Found: C 71.42, H 4.61, S 16.99, N 7.29

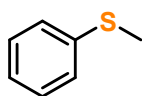

**Thioanisole (2o).** According to general procedure B, the desired product (**2o**, 42.1 mg, 96%) was isolated as a pale-yellow liquid (Pentane).  **$^1H$ -NMR** (300 MHz,  $CD_2Cl_2$ ):  $\delta$  = 7.33-7.27 (m, 4H), 7.18-7.14 (m, 1H), 2.49 (s, 3H).  **$^{13}C$ -NMR** (75 MHz,  $CD_2Cl_2$ ):  $\delta$  = 139.2, 129.4, 127.0, 125.5, 16.1. **HRMS (ESI-TOF)**  $m/z$   $[M-H]^+$  Calc. for  $C_7H_6S$ : 125.0425. Found: 125.0442. **Elemental analysis** Calc. (%) for  $C_7H_8S$ : C 67.69, H 6.49, S 25.82. Found: C 67.31, H 6.54, S 24.79.

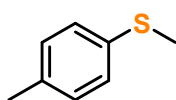

**4-methylthioanisole (2p).** According to general procedure B, the desired product (**2p**, 42.3 mg, 98%) was isolated as a yellow liquid (Pentane).  **$^1H$ -NMR** (300 MHz,  $CD_2Cl_2$ ):  $\delta$  = 7.18 (d,  $J$  = 8.4 Hz, 2H), 7.12 (d,  $J$  = 8.1 Hz, 2H), 2.46 (s, 3H), 2.32 (s, 3H).  **$^{13}C$ -NMR** (75 MHz,  $CD_2Cl_2$ ):  $\delta$  = 135.6, 135.4, 130.1, 127.6, 21.2, 16.7. **HRMS (ESI-TOF)**  $m/z$   $[M-H]^+$  Calc. for  $C_8H_{11}S$ : 139.0582. Found: 139.0581. **Elemental analysis** Calc. (%) for  $C_7H_{10}S$ : C 66.61, H 7.99, S 25.40. Found: C 66.39, H 7.63, S 26.01.

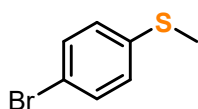

**4-bromothioanisole (2q).** According to general procedure B, the desired product (**2q**, 55.2 mg, 83%) was isolated as a white solid (Pentane).  **$^1H$ -NMR** (300 MHz,  $CD_2Cl_2$ ):  $\delta$  = 7.41 (d,  $J$  = 8.7 Hz, 2H), 7.12 (d,  $J$  = 8.7 Hz, 2H), 2.46 (s, 3H).  **$^{13}C$ -NMR** (75 MHz,  $CD_2Cl_2$ ):  $\delta$  = 135.6, 132.3, 128.5, 118.4, 16.1. **HRMS (ESI-TOF)**  $m/z$   $[M-H]^+$  Calc. for  $C_7H_8SBr$ : 204.9530. Found: 204.9522. **Elemental analysis** Calc. (%) for  $C_7H_7SBr$ : C 41.40, H 3.47, S 15.79. Found: C 41.85, H 3.10, S 15.51.

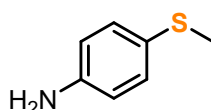

**4-(methylthio)aniline (2r).** According to general procedure B, the desired product (**2r**, 38.5 mg, 95%) was isolated as a brown oil (Pentane:EtOAc = 4:1).  **$^1H$ -NMR** (300 MHz,  $CD_2Cl_2$ ):  $\delta$  = 7.16 (d,  $J$  = 6.5 Hz, 2H), 6.63 (d,  $J$  = 6.5 Hz, 2H), 3.72 (brs, 2H), 2.40 (s, 3H).  **$^{13}C$ -NMR** (75 MHz,  $CD_2Cl_2$ ):  $\delta$  = 146.0, 131.4, 126.0, 116.0, 19.0. **HRMS (ESI-TOF)**  $m/z$   $[M-H]^+$  Calc. for  $C_7H_{10}SN$ : 139.0582. Found: 139.0581. **Elemental analysis** Calc. (%) for  $C_7H_9SN$ : C 60.39, H 6.52, S 23.03, N 10.06. Found: C 61.08, H 5.84, S 23.03, N 10.15.

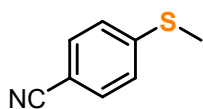

**4-cyanothioanisole (2s).** According to general procedure B, the desired product (**2s**, 40.4 mg, 89%) was isolated as white solid (Pentane:EtOAc = 9:1). **<sup>1</sup>H-NMR** (300 MHz, CD<sub>2</sub>Cl<sub>2</sub>): δ = 7.53(d, J = 8.8 Hz, 2H), 7.27 (d, J = 8.7 Hz, 2H), 2.50 (s, 3H). **<sup>13</sup>C-NMR** (75 MHz, CD<sub>2</sub>Cl<sub>2</sub>): δ = 146.7, 132.6, 125.9, 119.4, 108.1, 15.0. **HRMS (ESI-TOF) *m/z* [M-H]<sup>+</sup>** Calc. for C<sub>8</sub>H<sub>8</sub>SN: 150.0378. Found: 150.0377. **Elemental analysis** Calc. (%) for C<sub>8</sub>H<sub>7</sub>SN: C 64.40, H 4.73, S 21.49, N 9.39. Found: C 63.99, H 4.65, S 21.09, N 9.35.

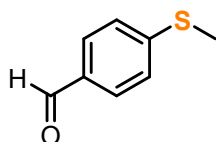

**4-(methylthio)benzaldehyde (2t).** According to general procedure B, the desired product (**2t**, 43.1 mg, 95%) was isolated as yellow liquid (Pentane:EtOAc = 9:1). **<sup>1</sup>H-NMR** (300 MHz, CD<sub>2</sub>Cl<sub>2</sub>): δ = 9.90 (s, 1H), 7.75 (d, J = 8.6 Hz, 2H), 7.33 (d, J = 8.4 Hz, 2H), 2.53 (s, 3H). **<sup>13</sup>C-NMR** (75 MHz, CD<sub>2</sub>Cl<sub>2</sub>): δ = 191.5, 148.4, 135.6, 130.3, 125.6, 15.0. **HRMS (ESI-TOF) *m/z* [M-H]<sup>+</sup>** Calc. for C<sub>8</sub>H<sub>9</sub>SO: 153.0374. Found: 153.0374. **Elemental analysis** Calc. (%) for C<sub>8</sub>H<sub>8</sub>SO: C 63.13, H 5.30, S 21.07. Found: C 62.87, H 5.27, S 20.89.

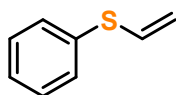

**Phenyl vinyl sulfide (2w).** According to general procedure B, the desired product (**2w**, 18.4 mg, 49%) was isolated as an orange oil (Pentane). **<sup>1</sup>H-NMR** (300 MHz, CD<sub>2</sub>Cl<sub>2</sub>): δ = 7.41-7.25 (m, 5H), 6.58 (dd, J = 9.6 Hz, J = 16.6 Hz, 1H), 5.39 (d, J = 3.6 Hz, 1H), 5.34 (d, J = 10.7 Hz, 1H). **<sup>13</sup>C-NMR** (75 MHz, CD<sub>2</sub>Cl<sub>2</sub>): δ = 134.9, 132.4, 130.9, 129.7, 127.7, 115.9. **HRMS (ESI-TOF) *m/z* [M-H]<sup>+</sup>** Calc. for C<sub>8</sub>H<sub>8</sub>S: 137.0425. Found: 137.0422. **Elemental analysis** Calc. (%) for C<sub>8</sub>H<sub>8</sub>S: C 70.54, H 5.92, S 23.54. Found: C 71.15, H 5.22, S 23.68.

## 8. $^1\text{H}$ and $^{13}\text{C}$ NMR spectra of isolated compounds

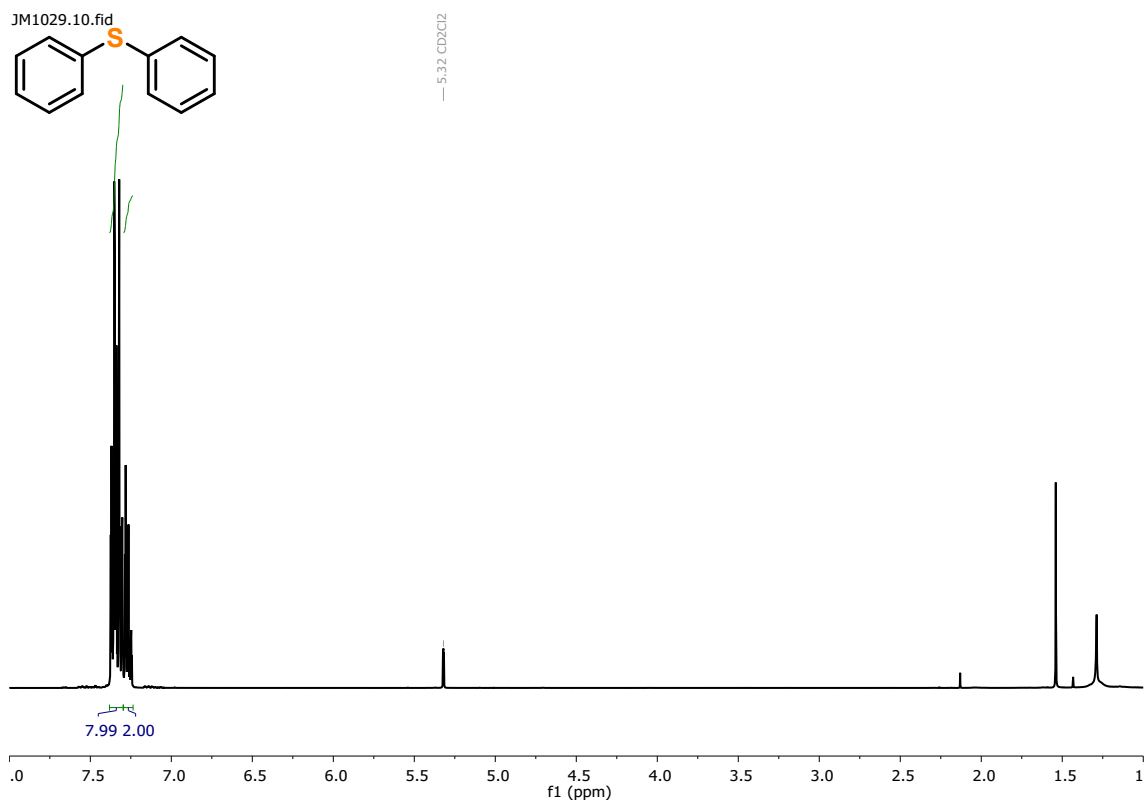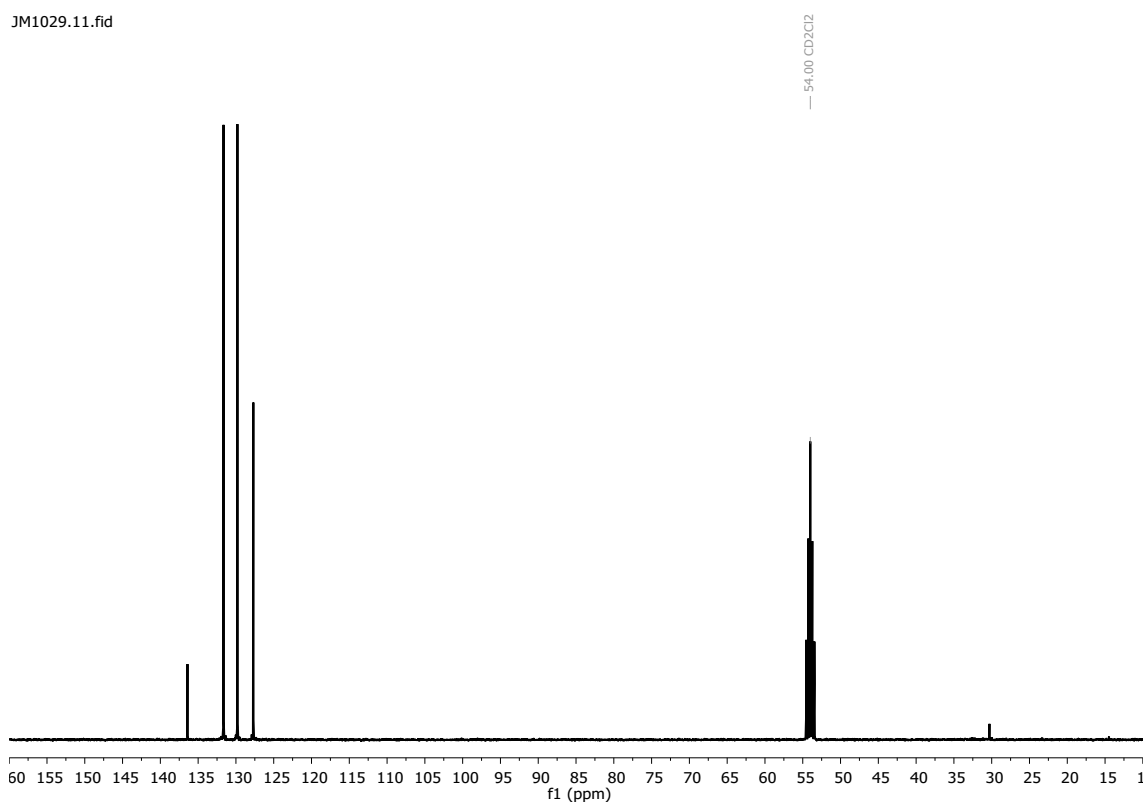



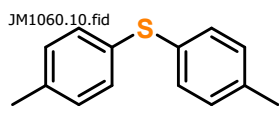

— 5.32 CD2Cl2

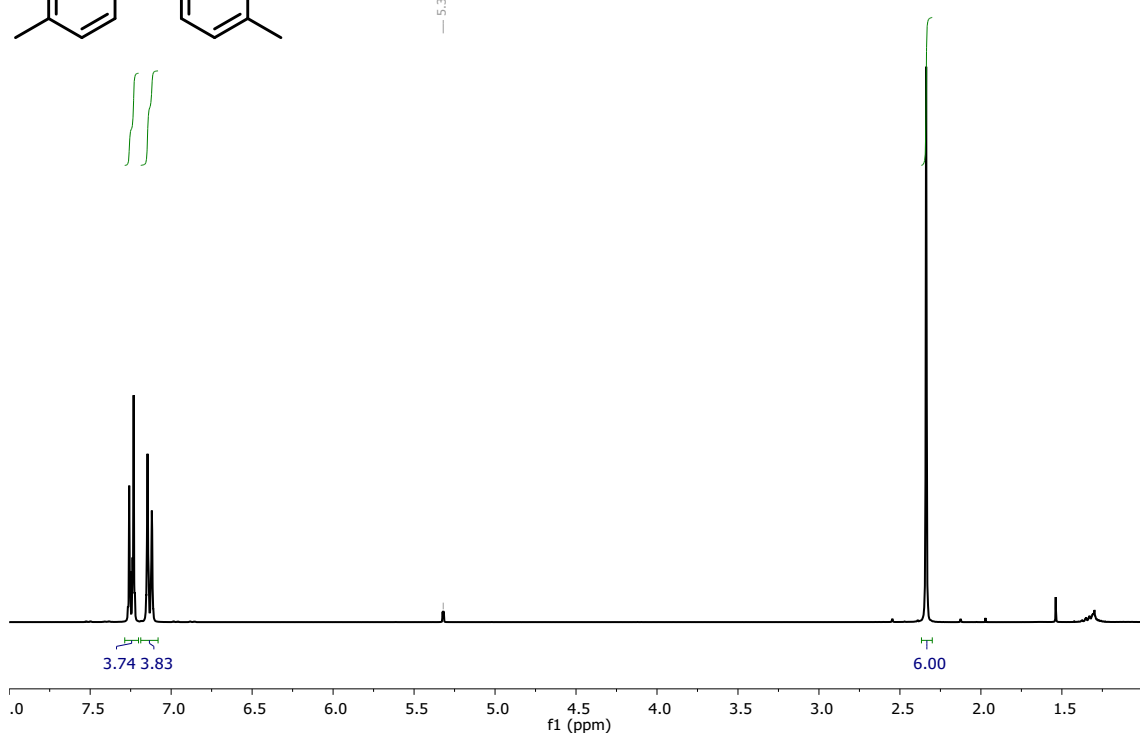

JM1060.11.fid

— 54.00 CD2Cl2

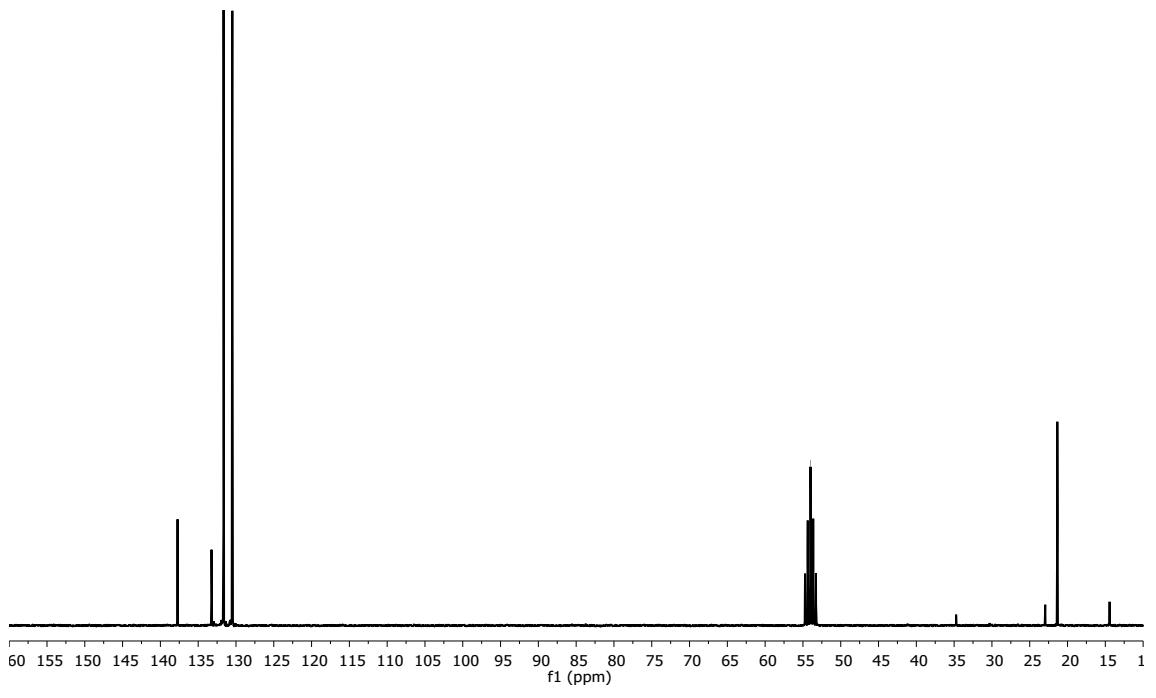

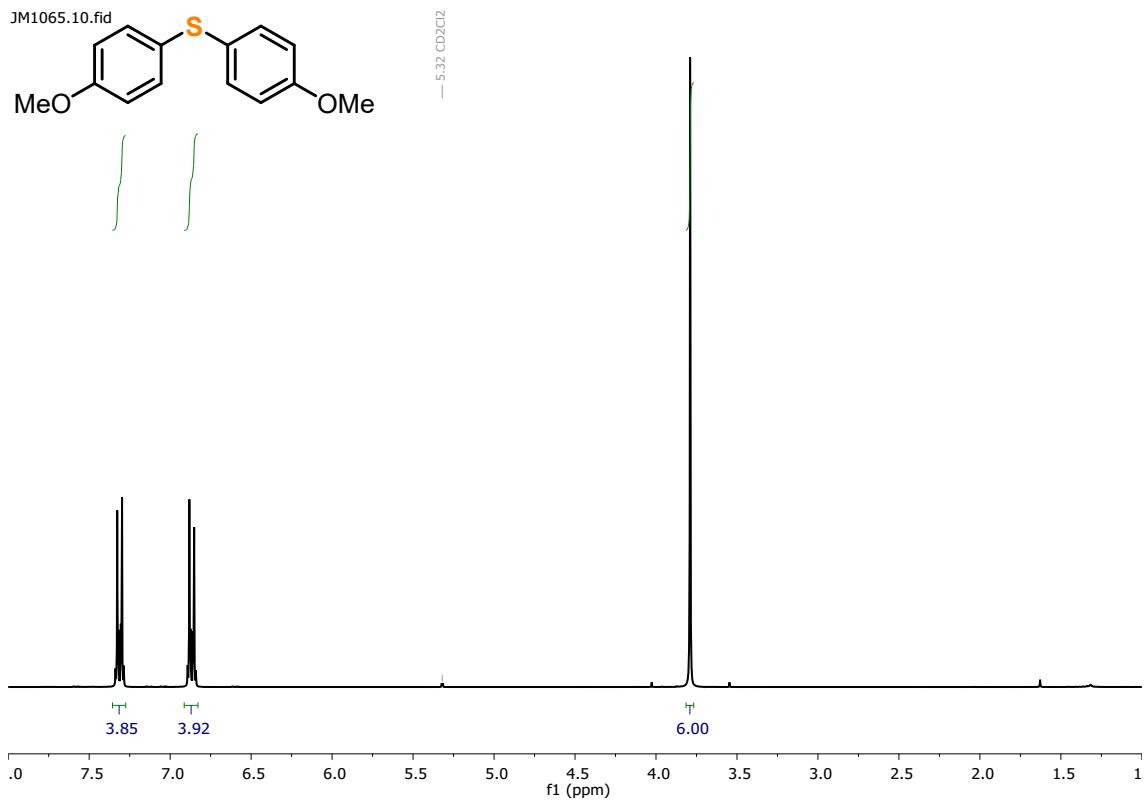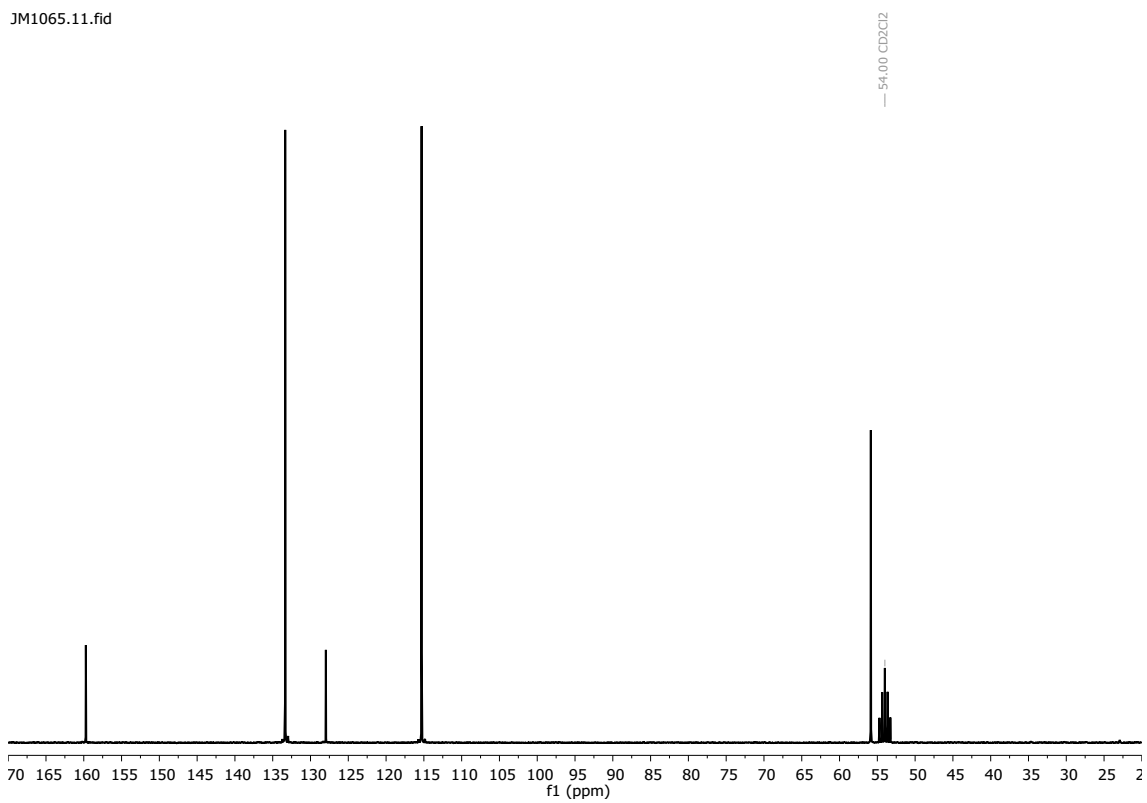

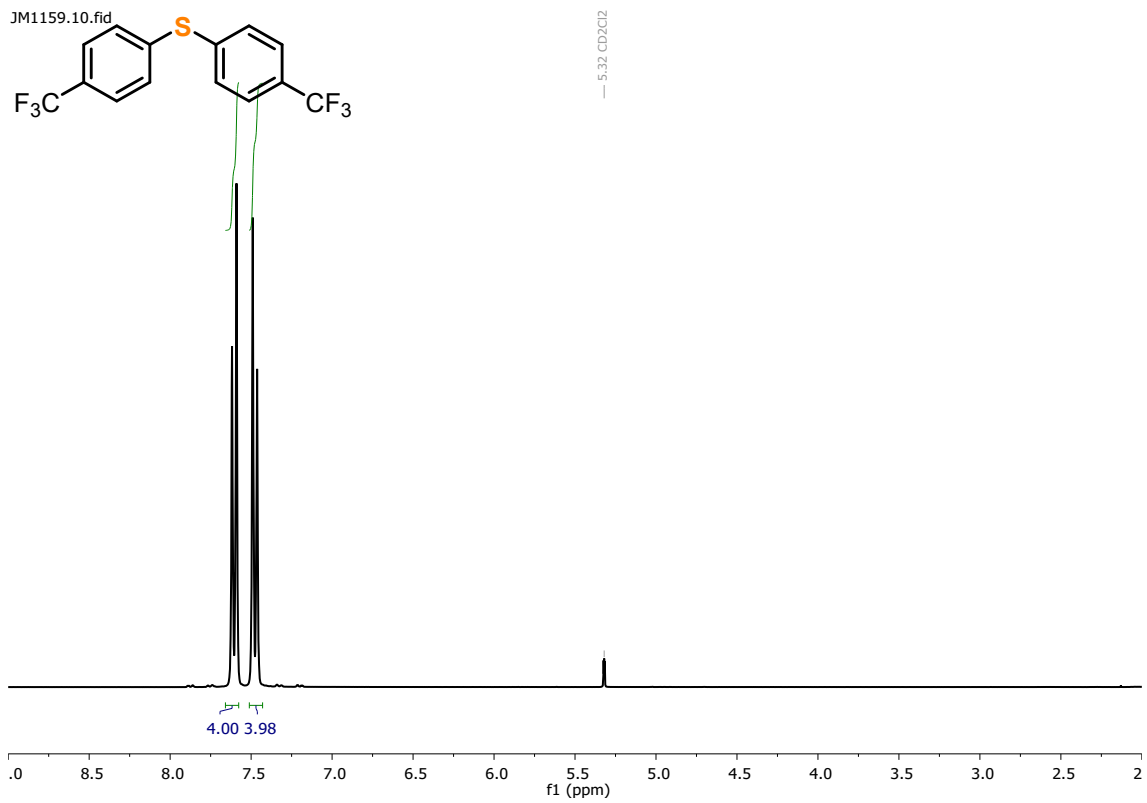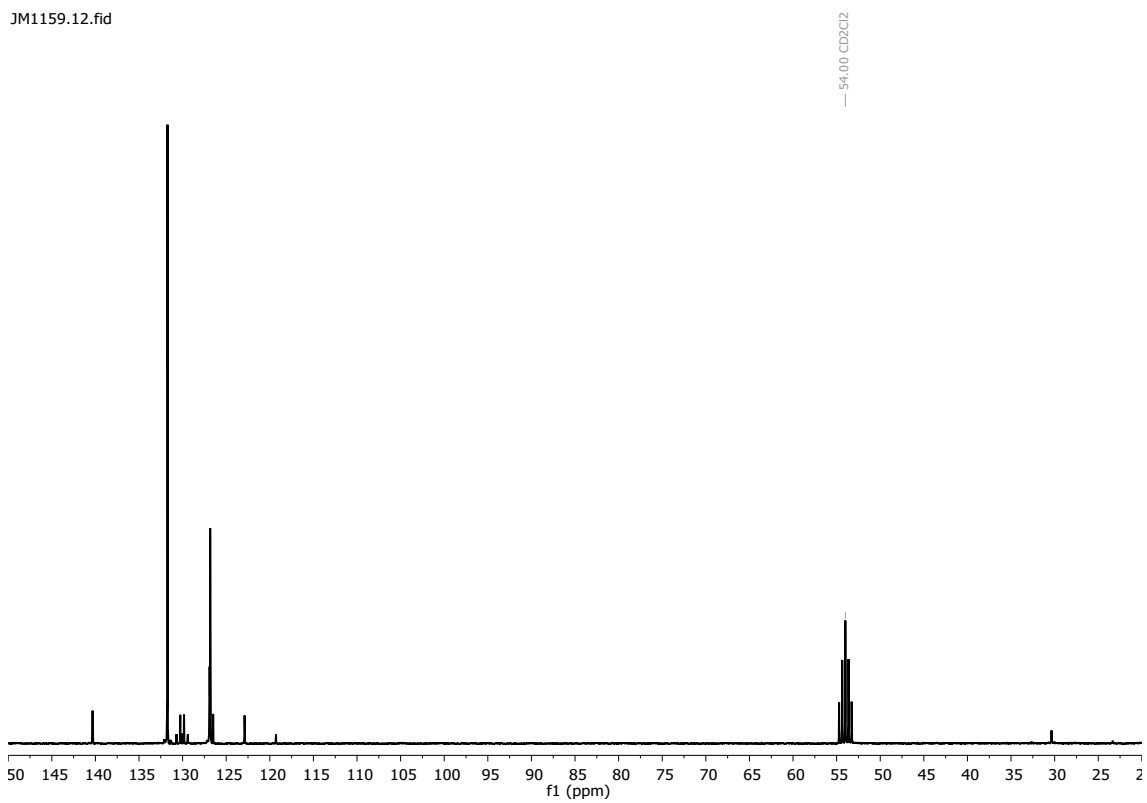

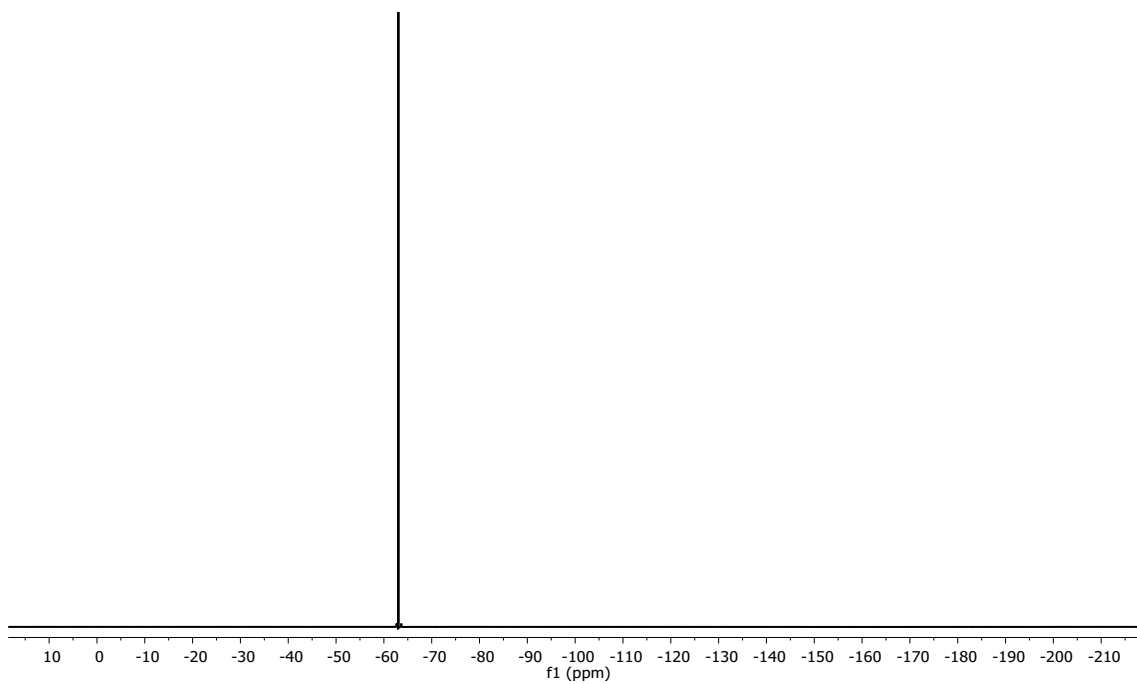

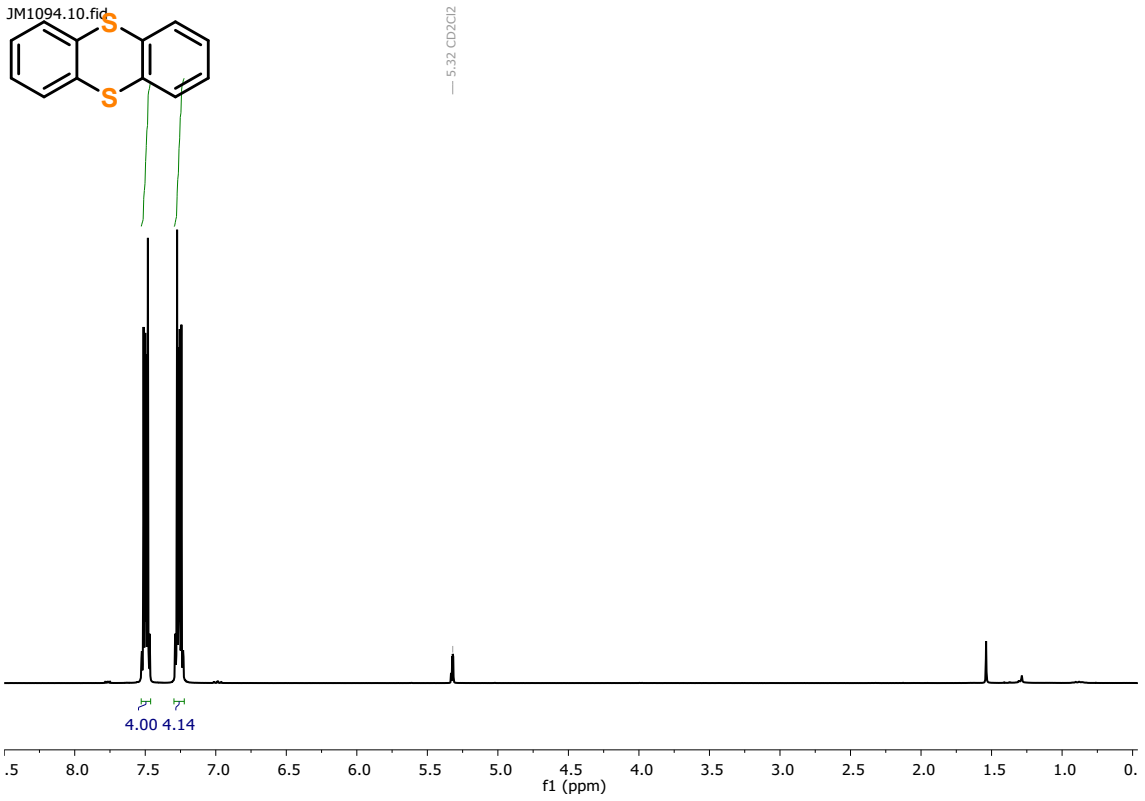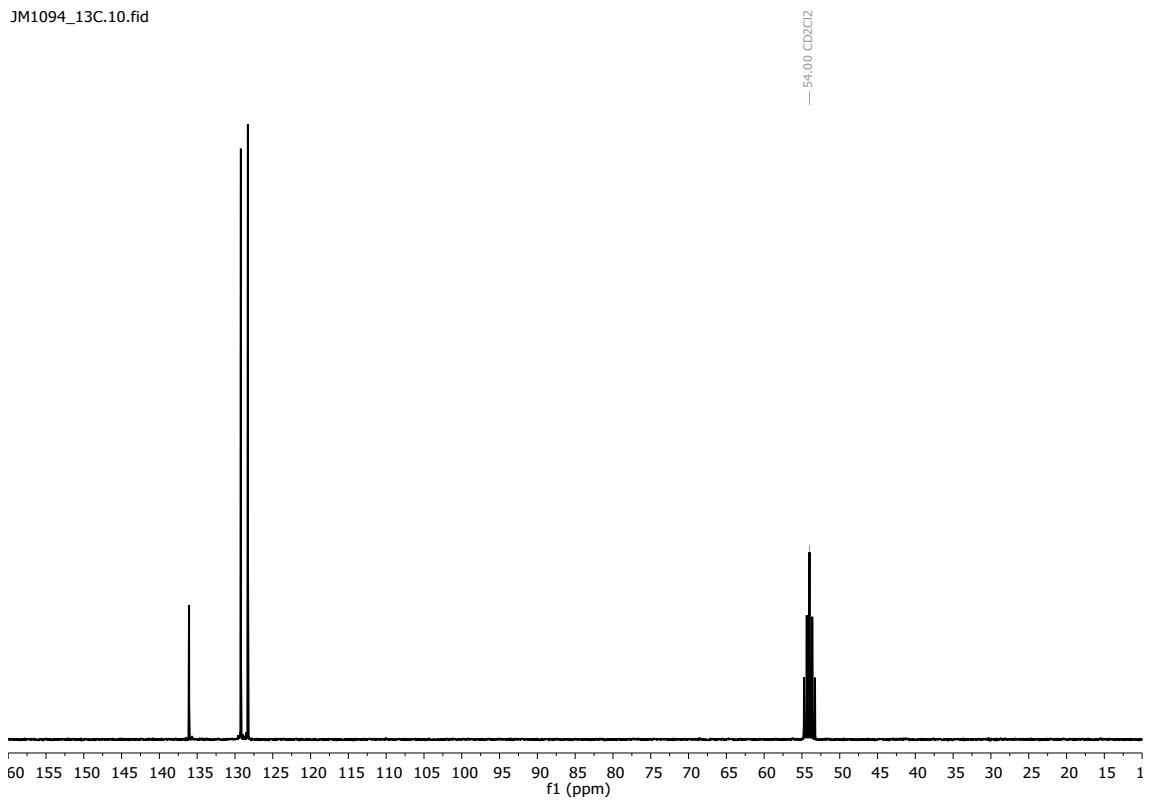

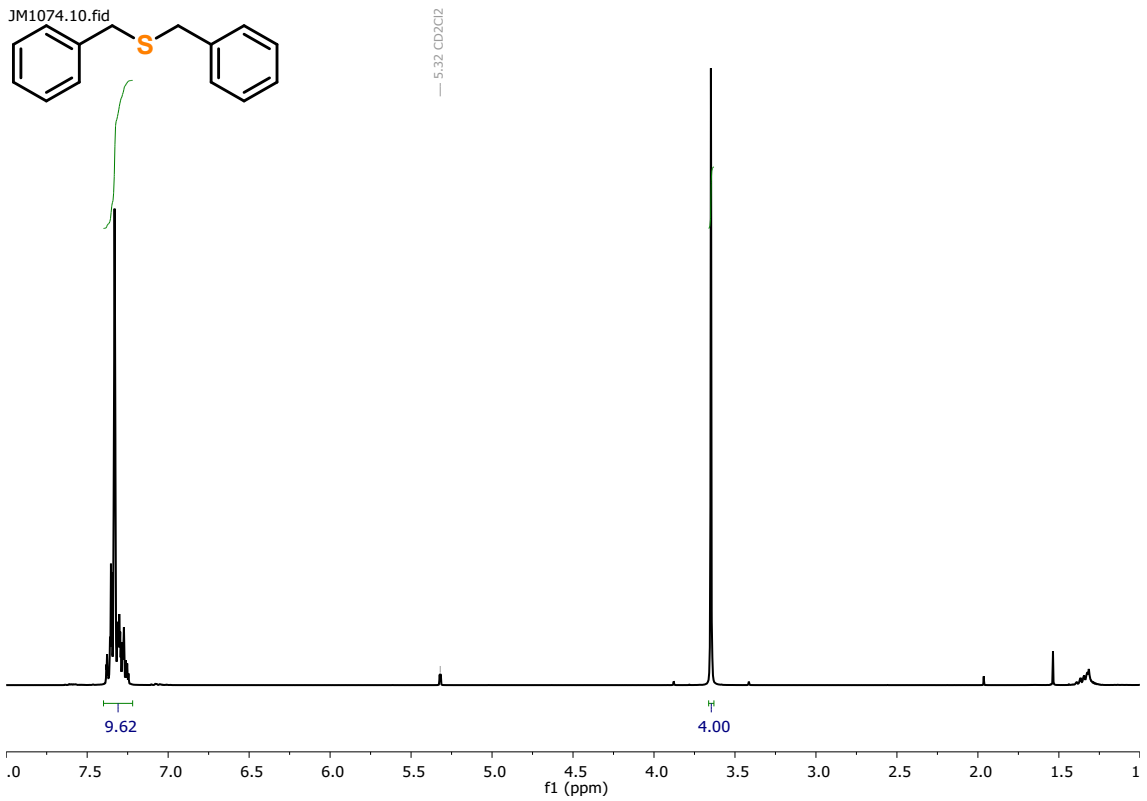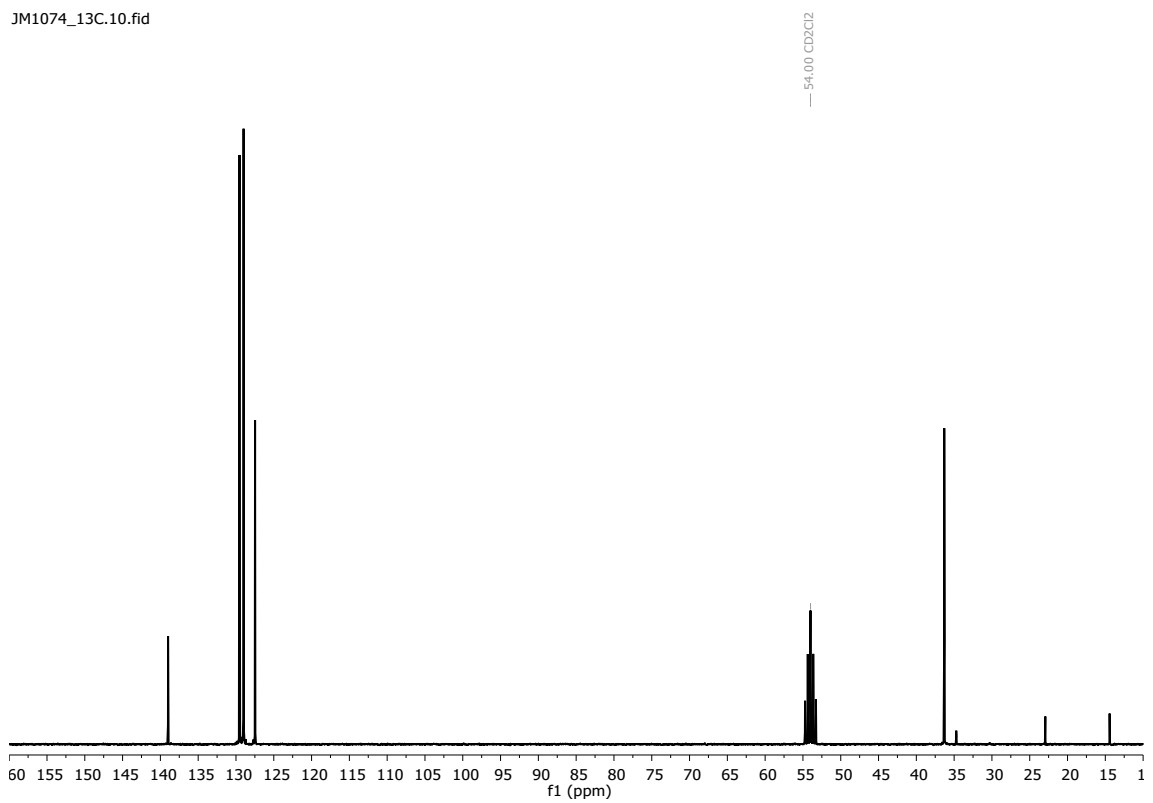

JM1072B.10.fid

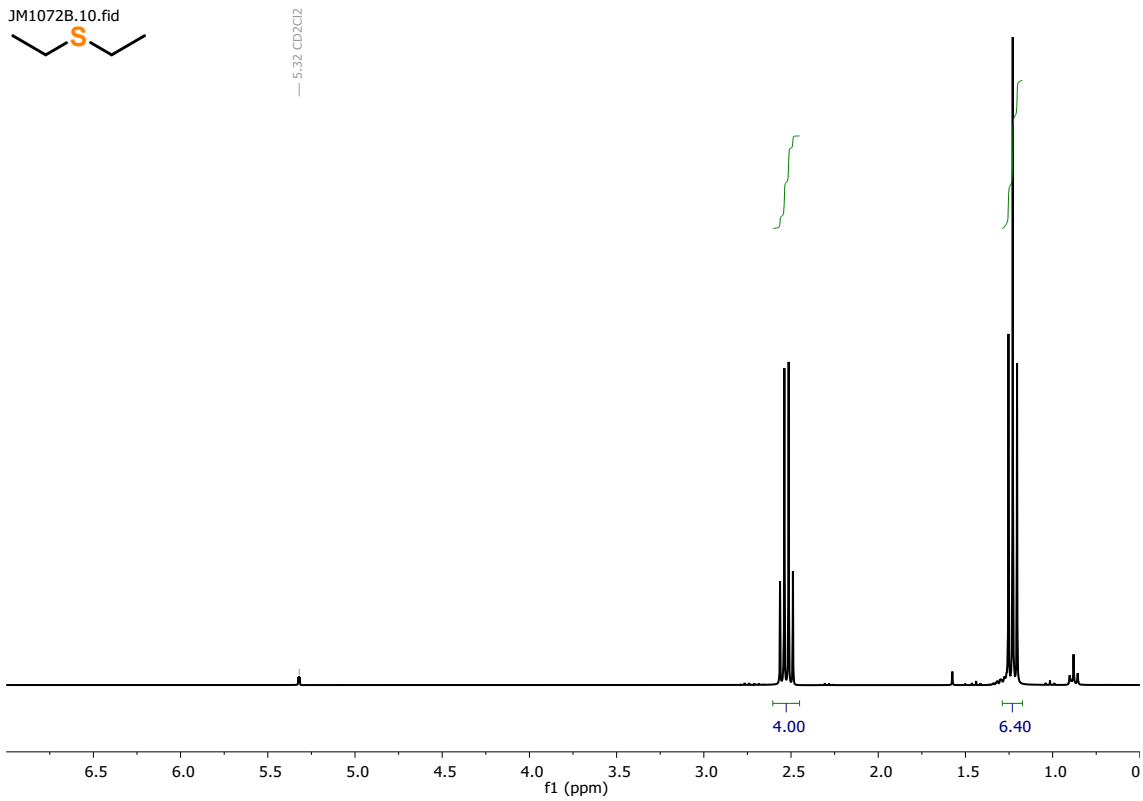

JM1072B.20.fid

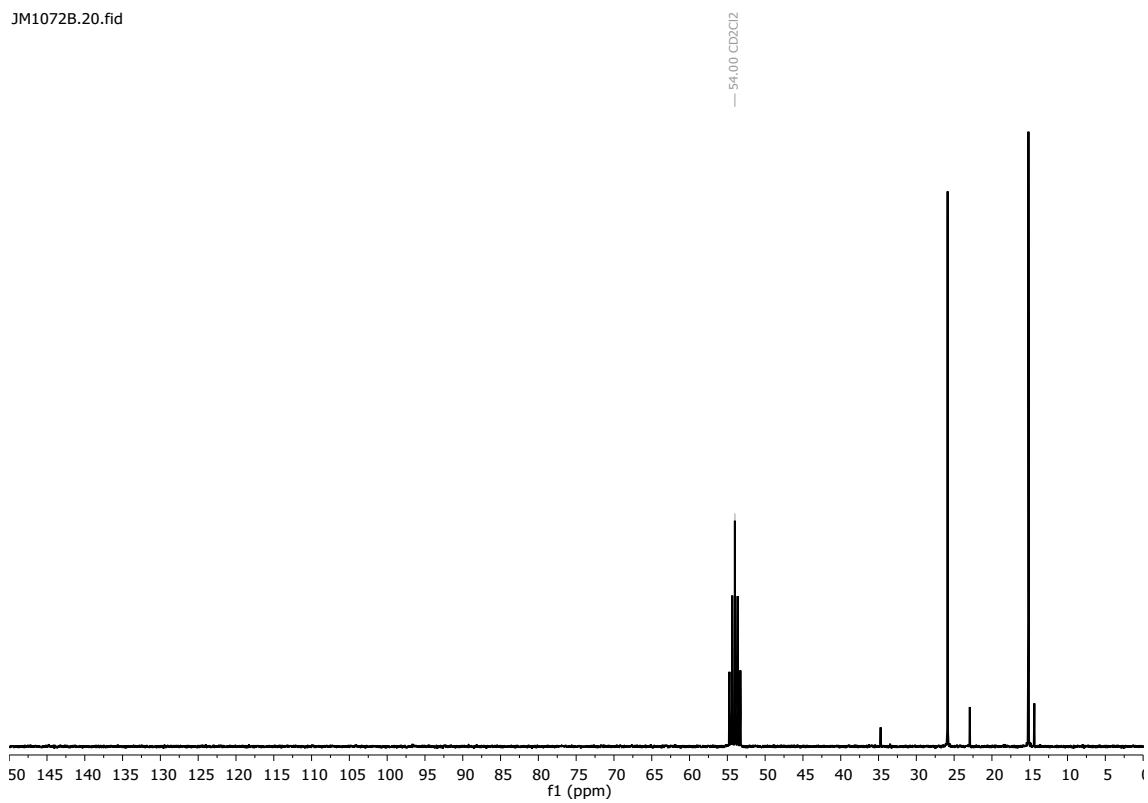

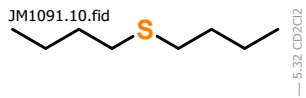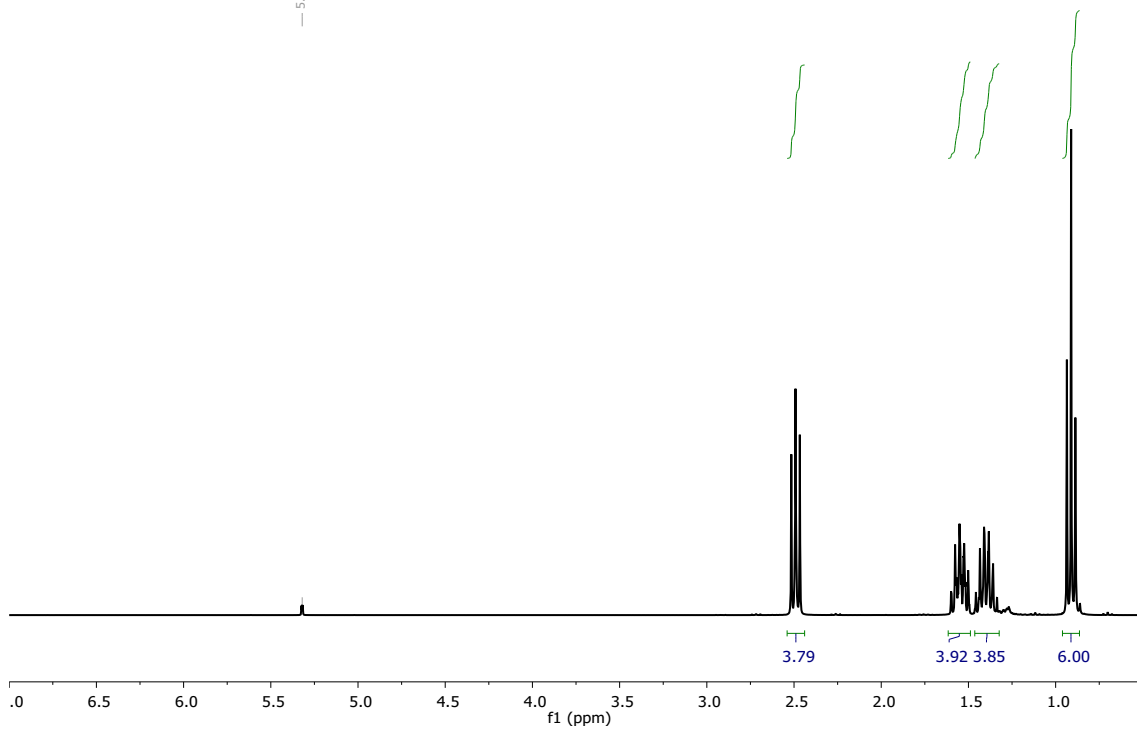

JM1091\_13C.10.fid

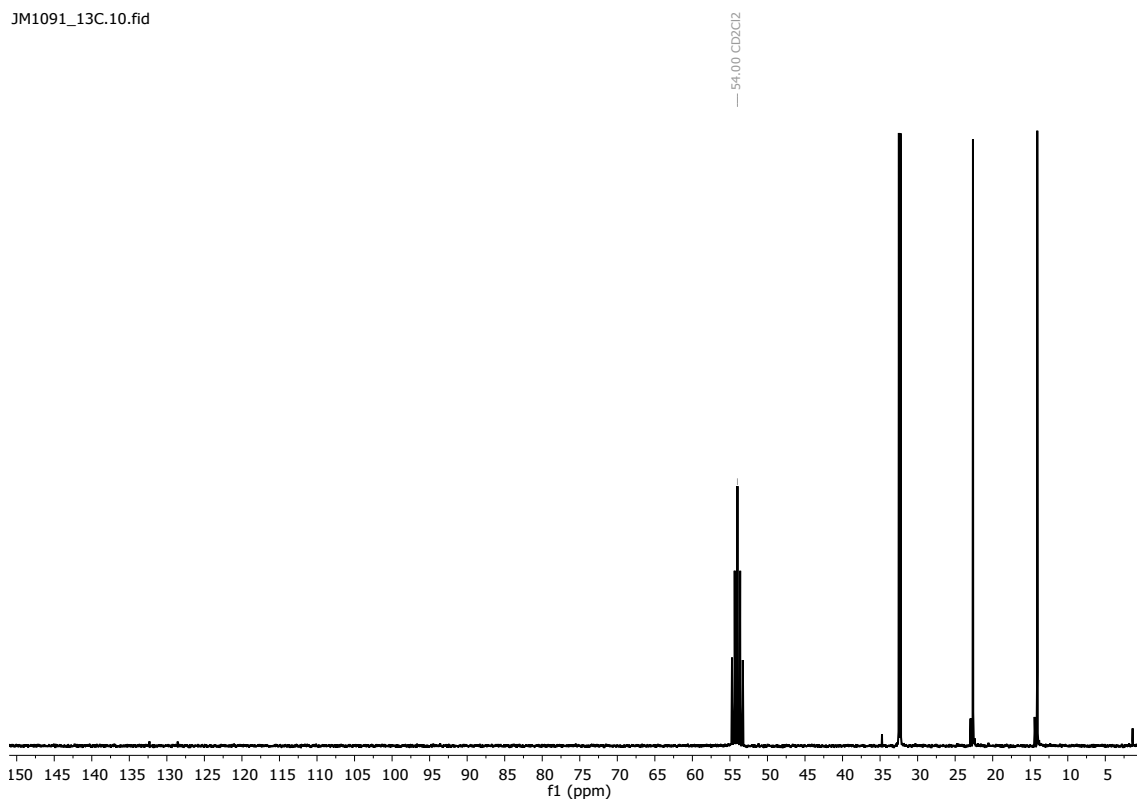



JM1073B.10.fid

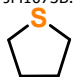

— 5.32 CD2Cl2

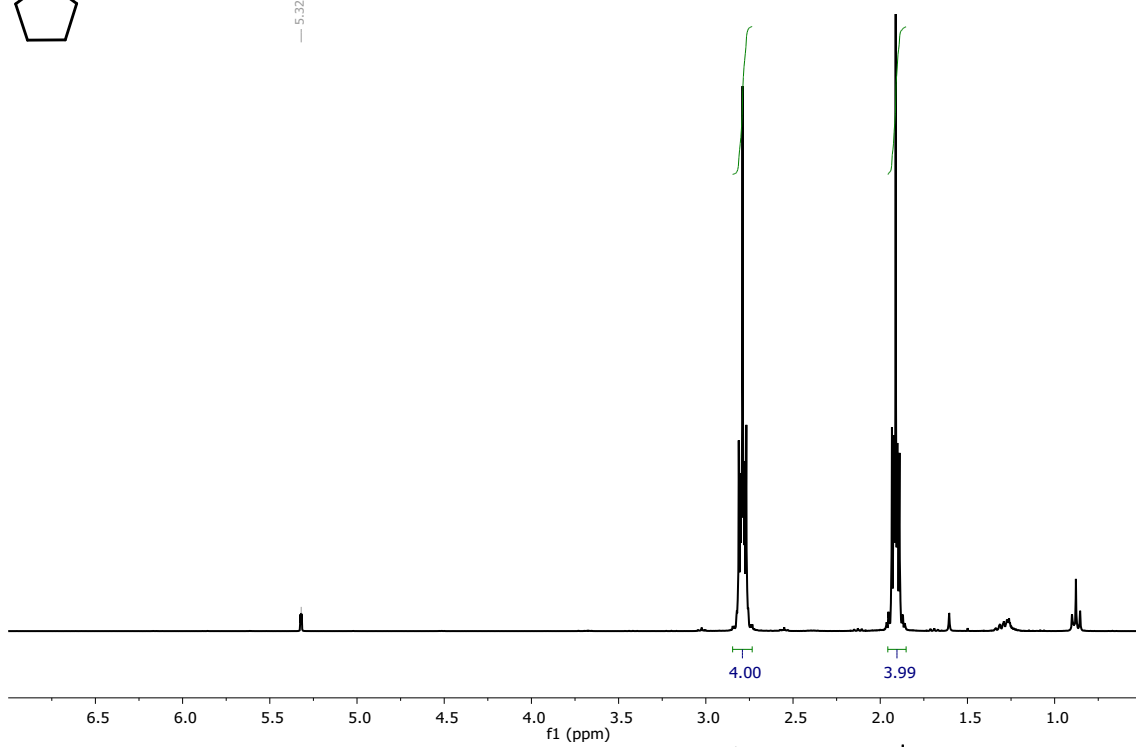

JM1073B.11.fid

— 54.00 CD2Cl2

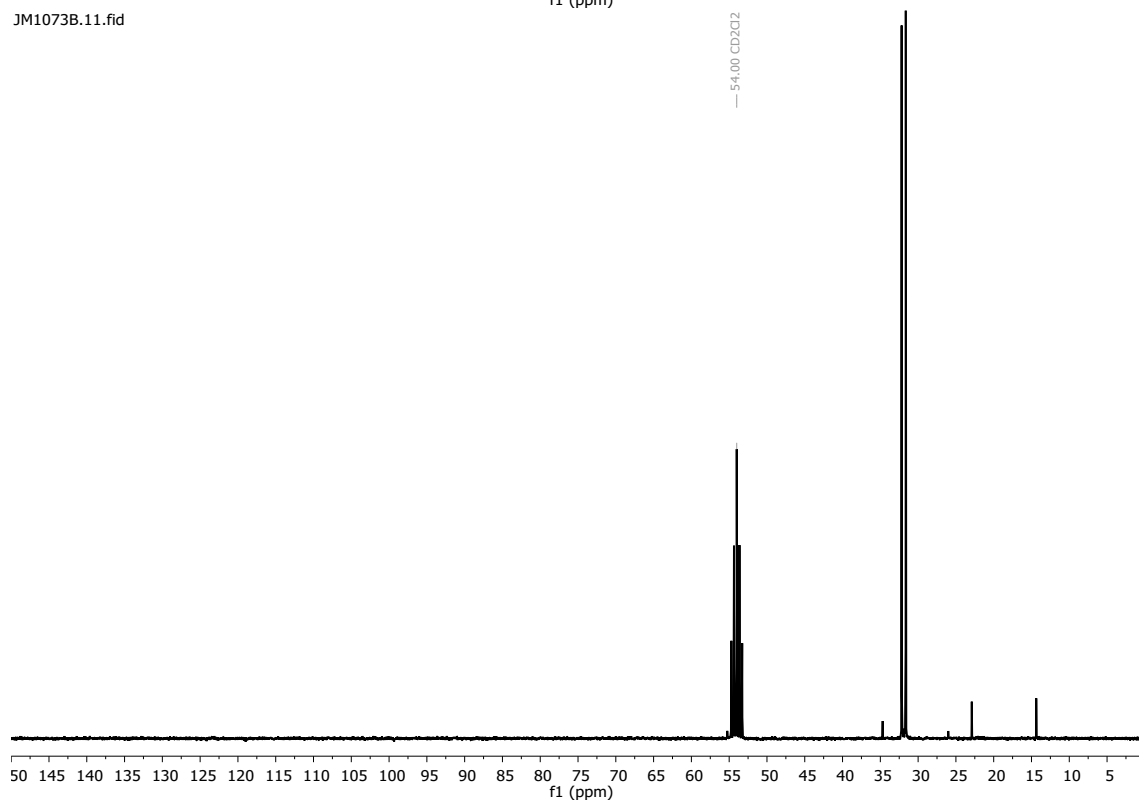

JM1143.10.fid

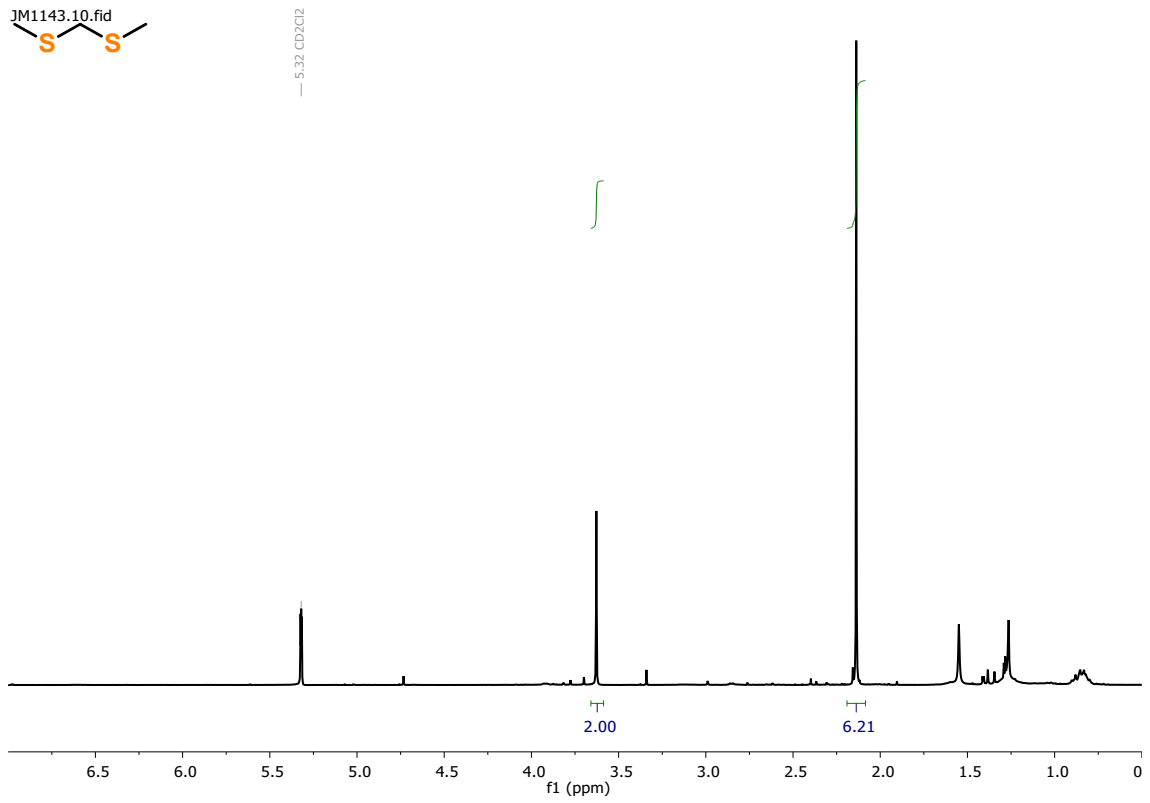

JM1143.11.fid

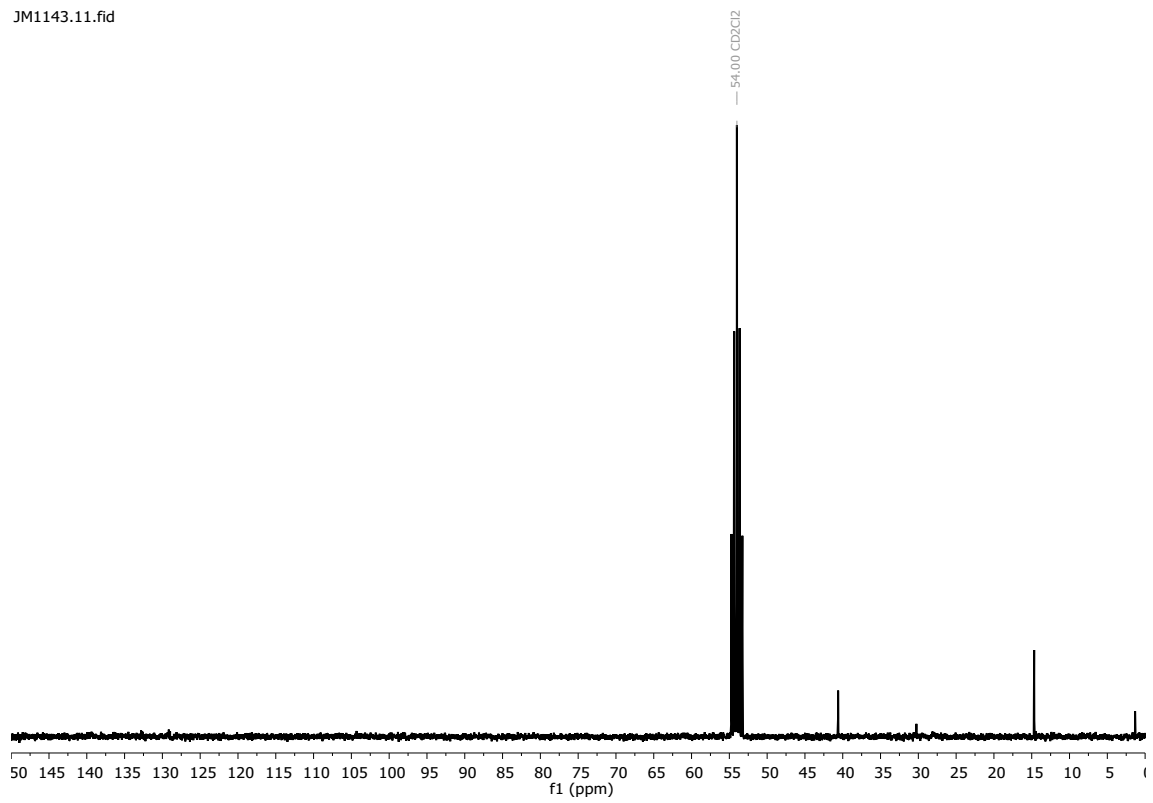

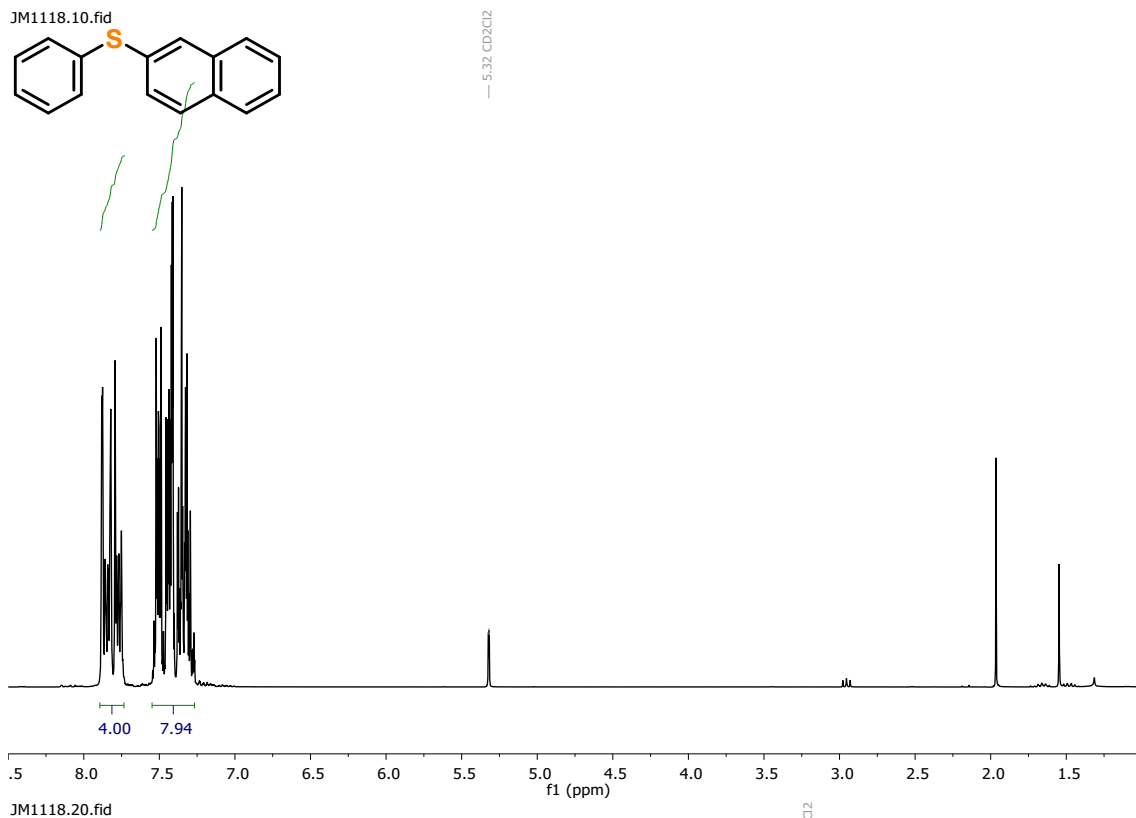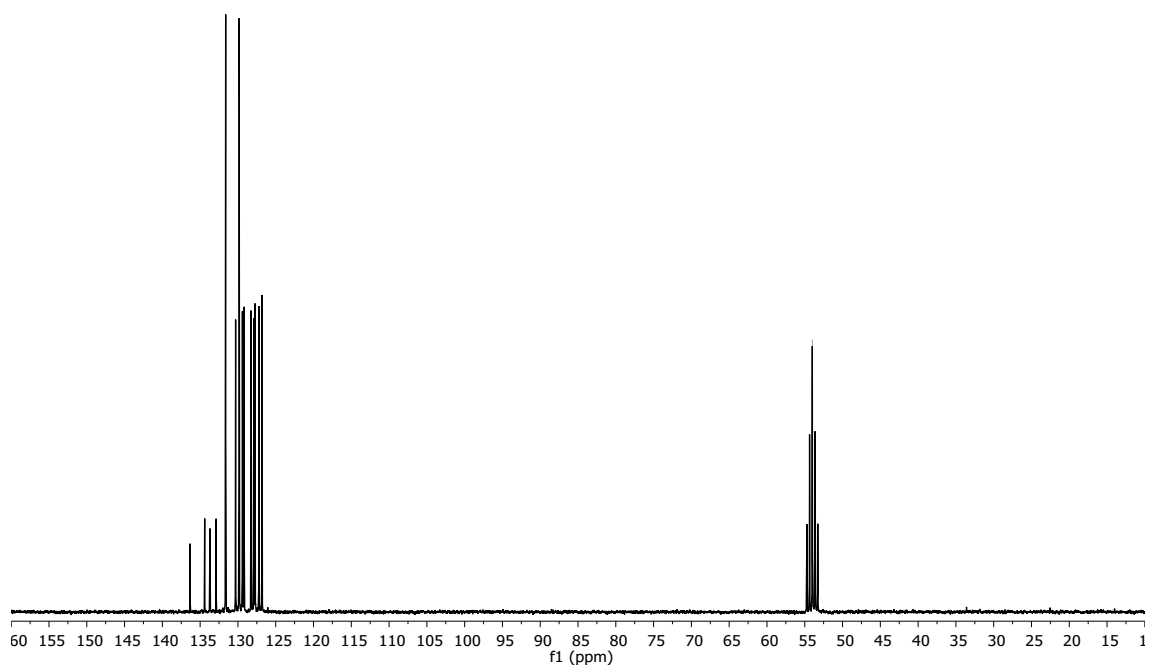

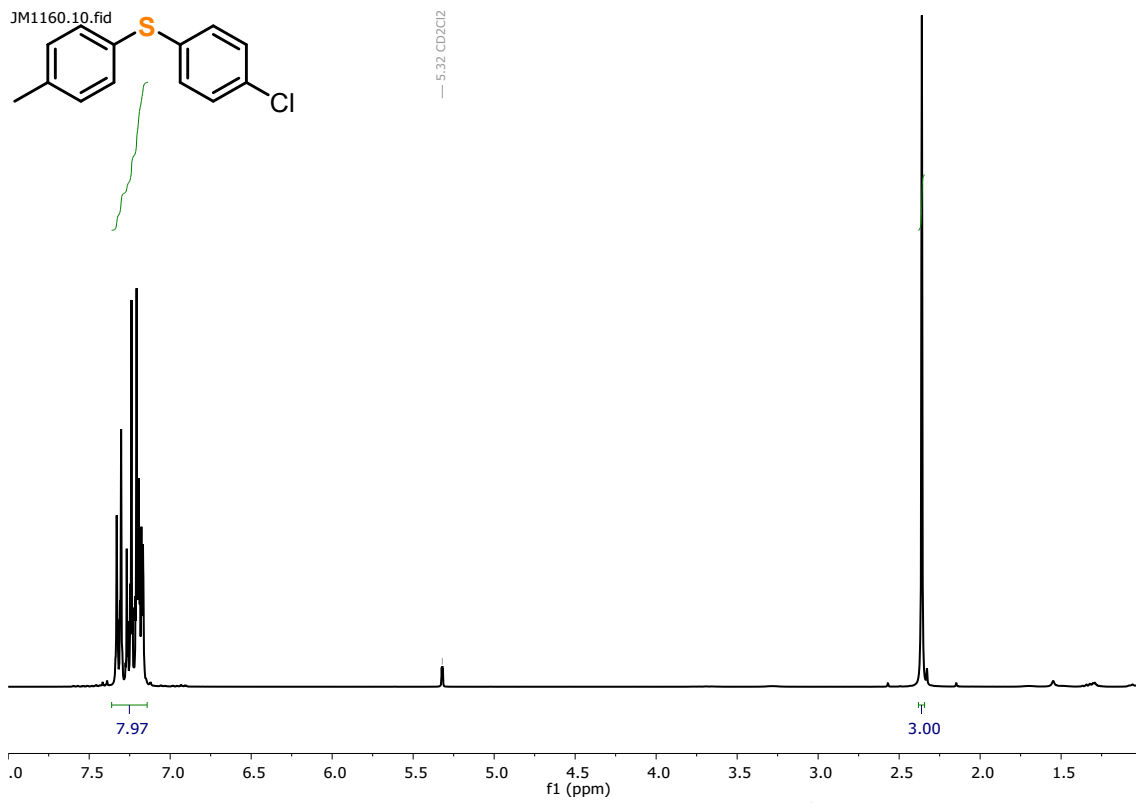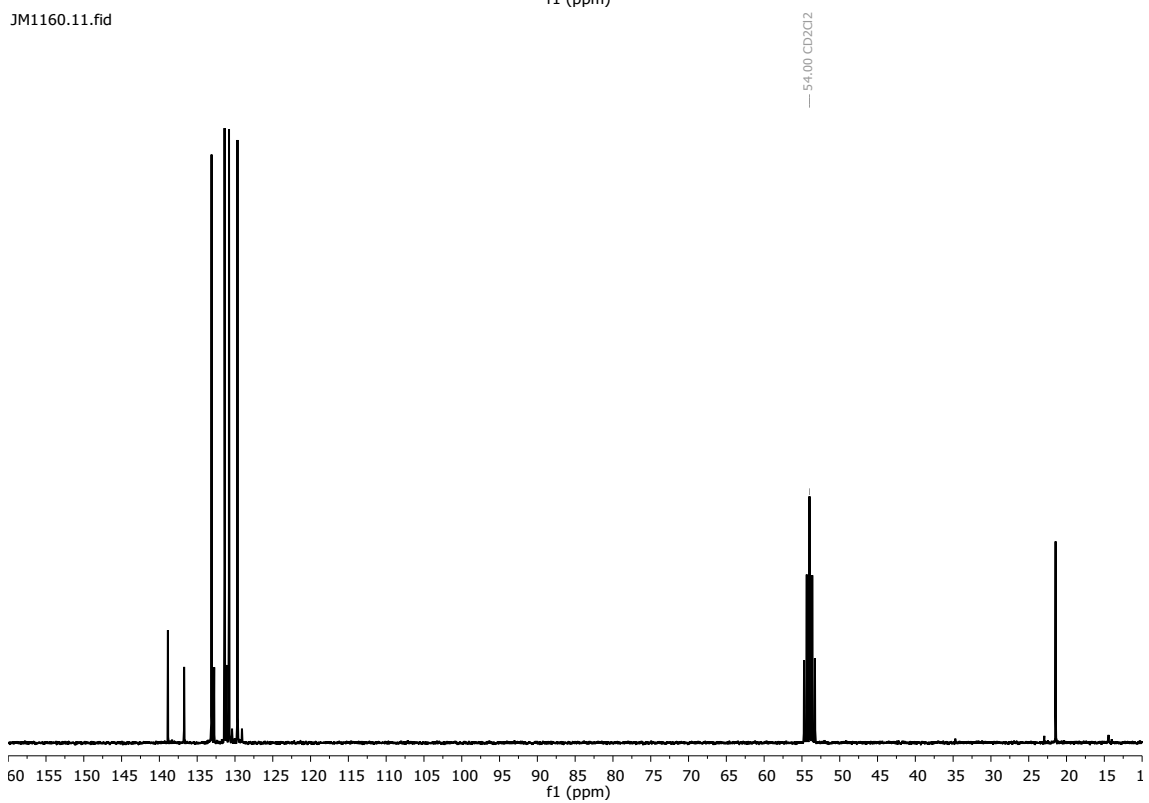

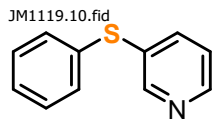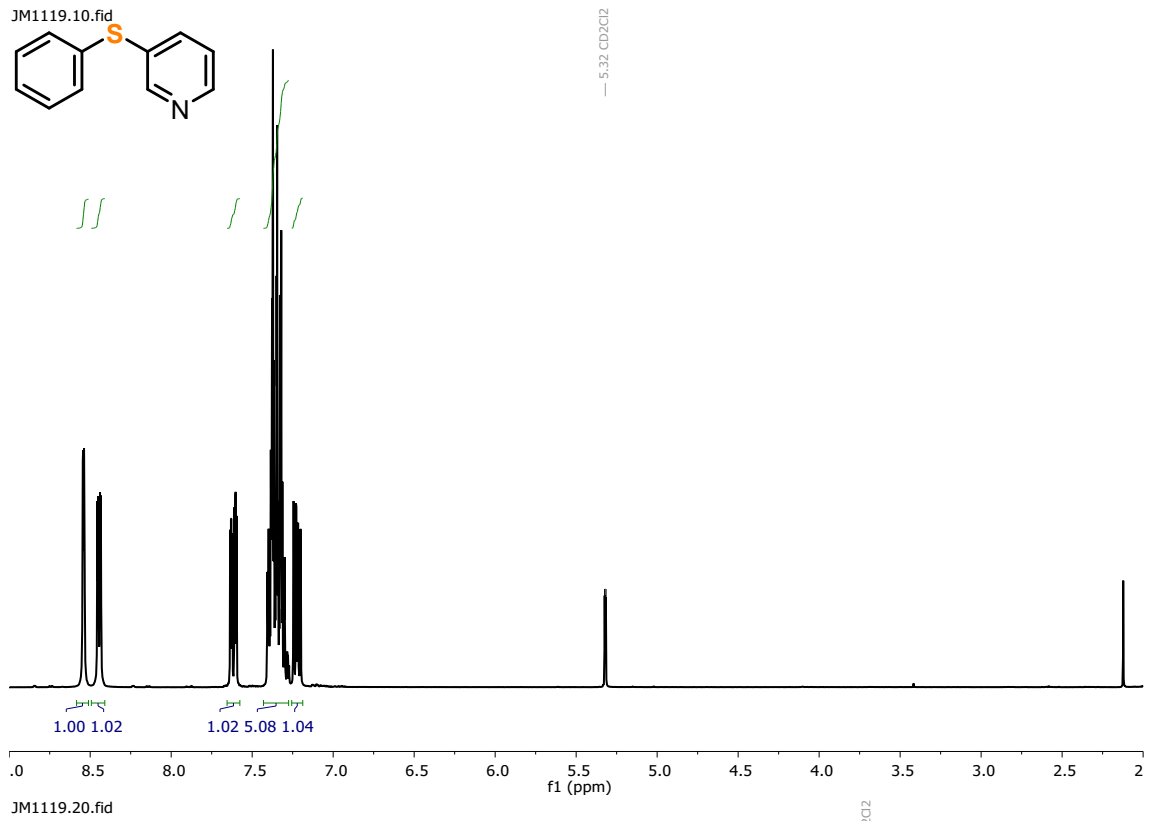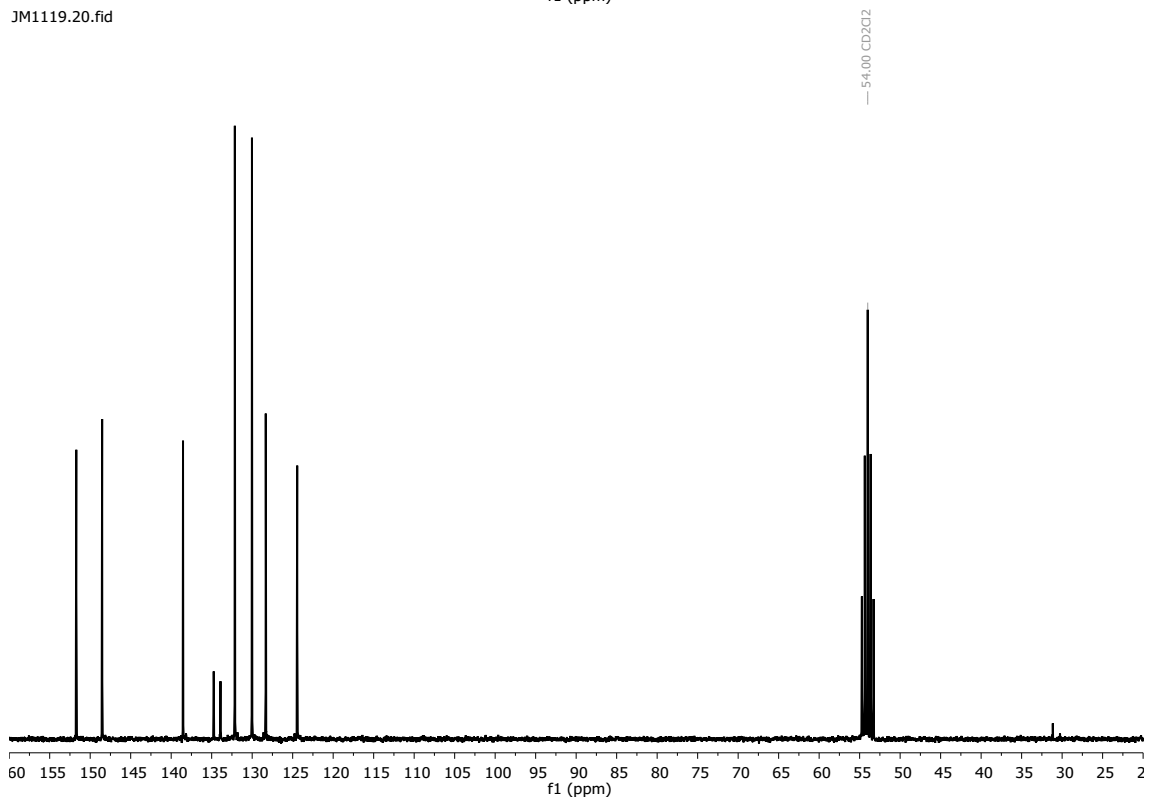

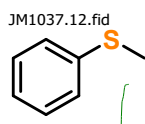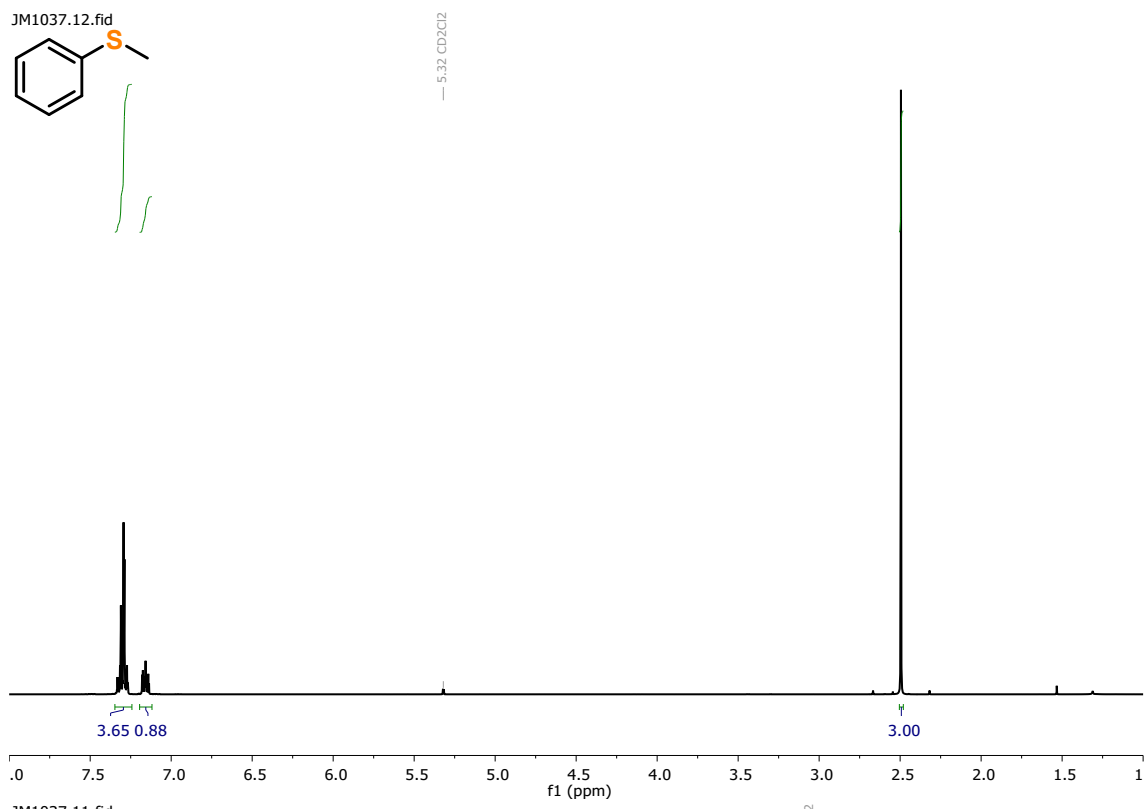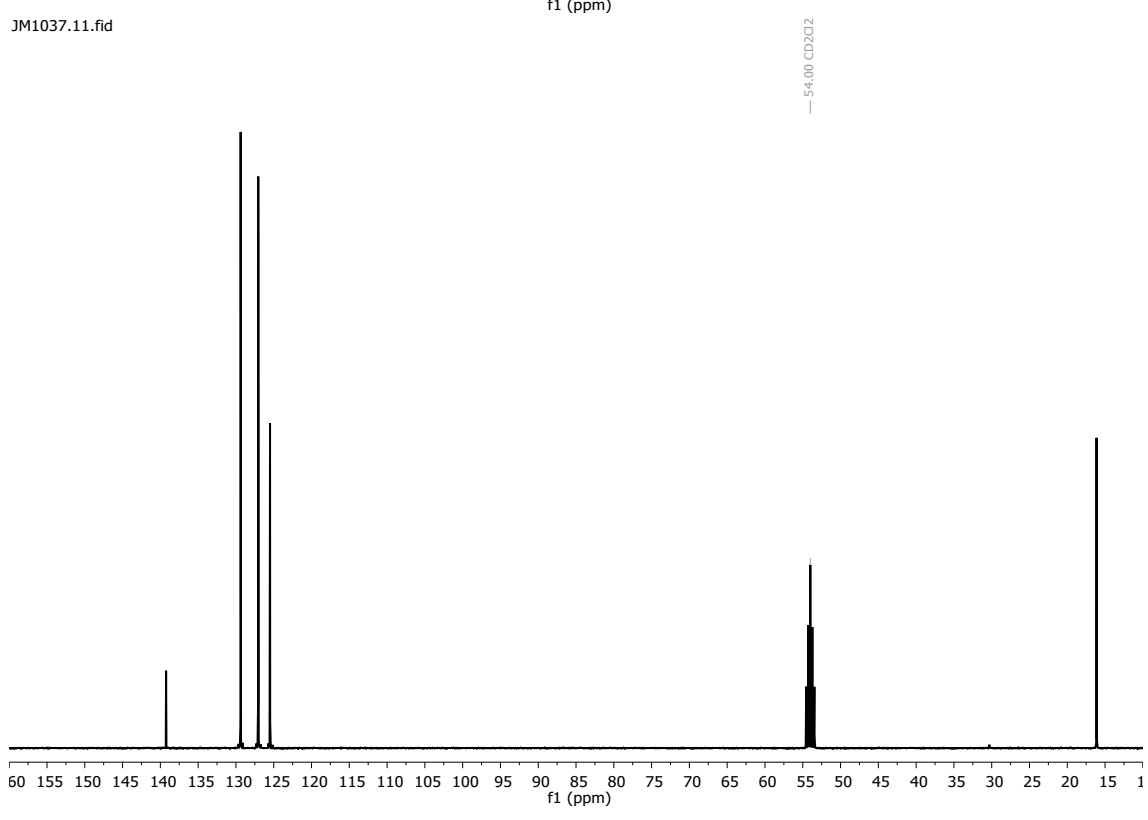

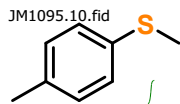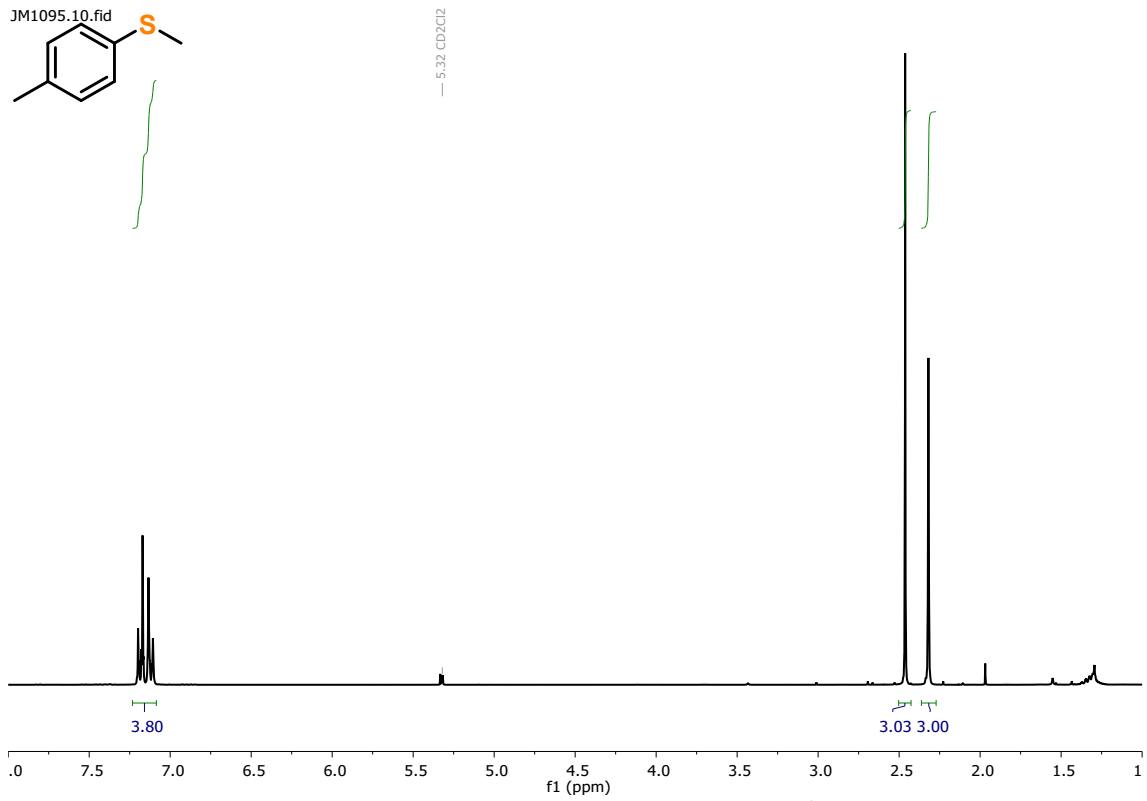

JM1095\_13C.10.fid

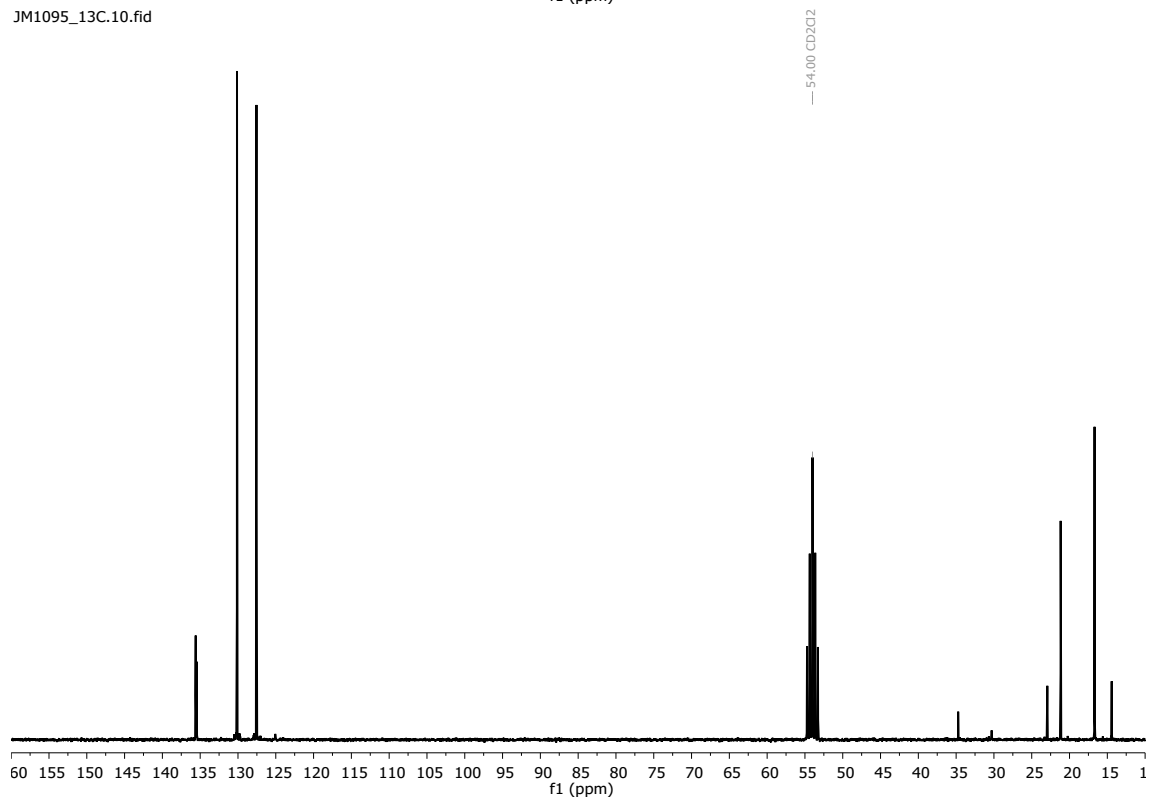

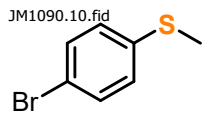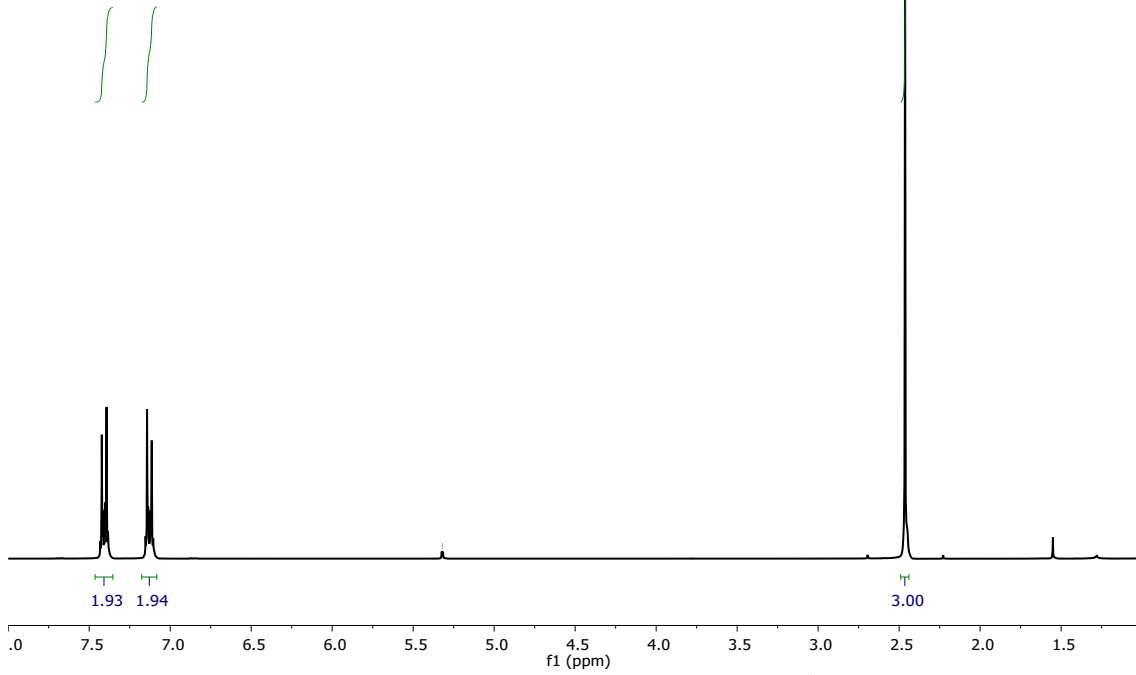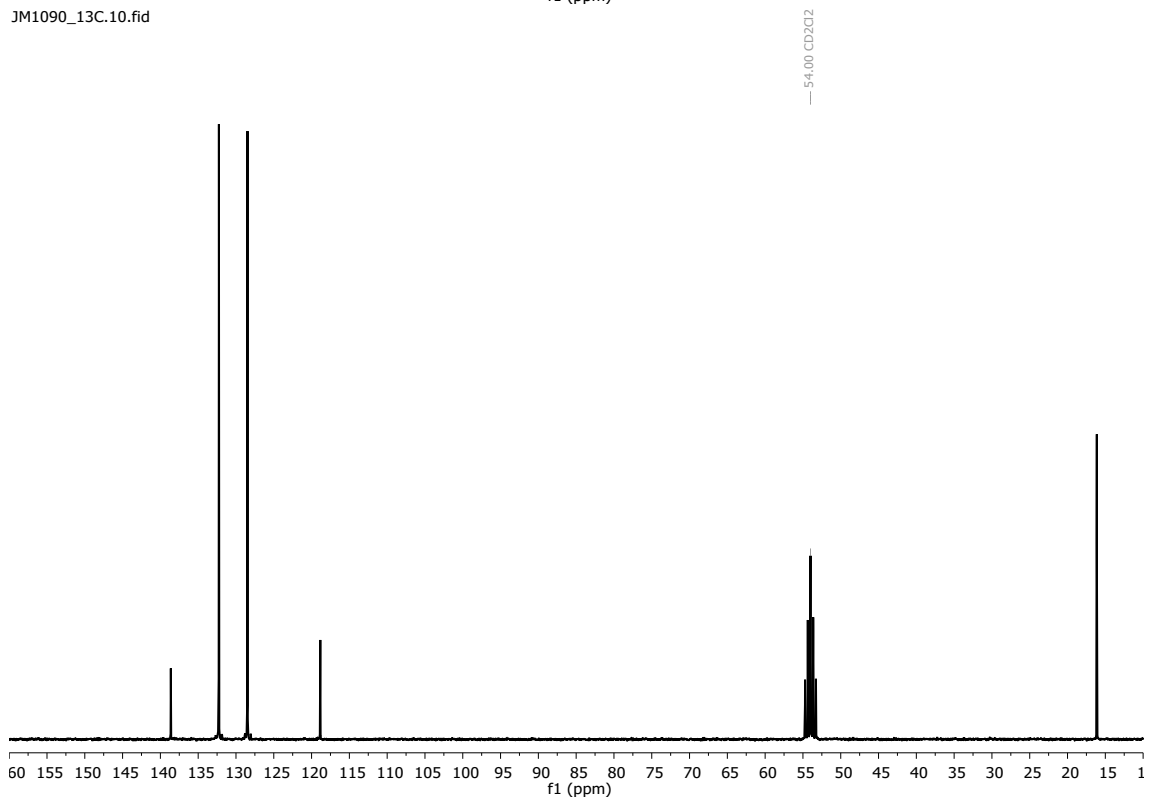



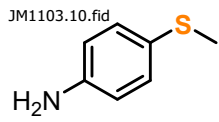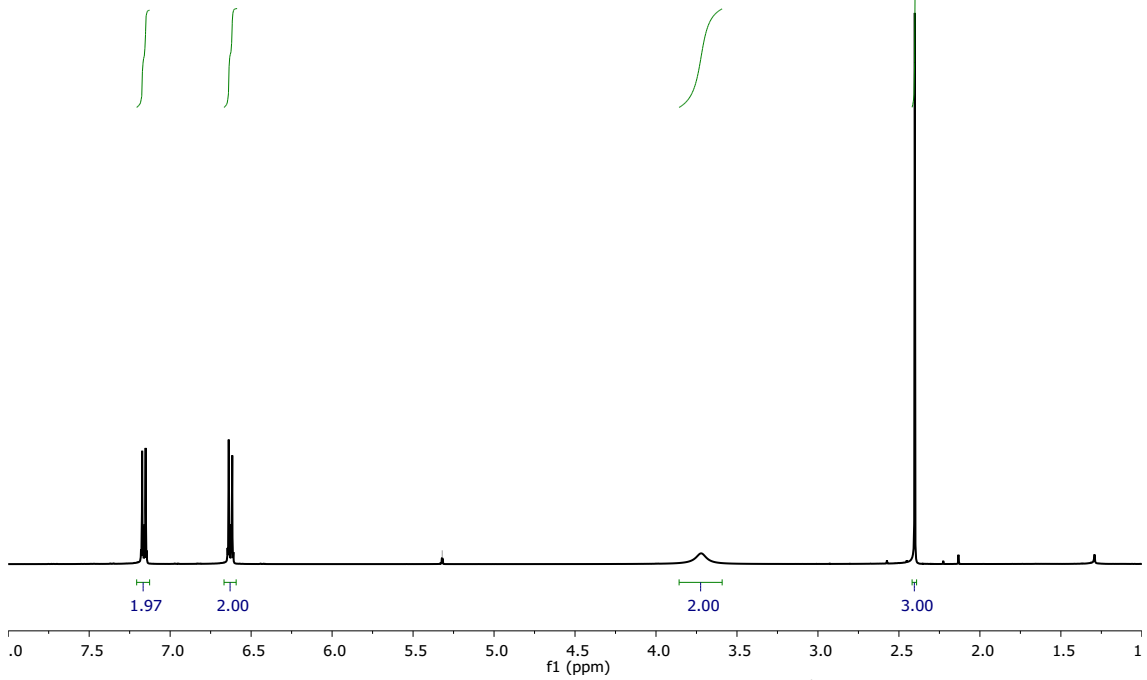

JM1103.11.fid

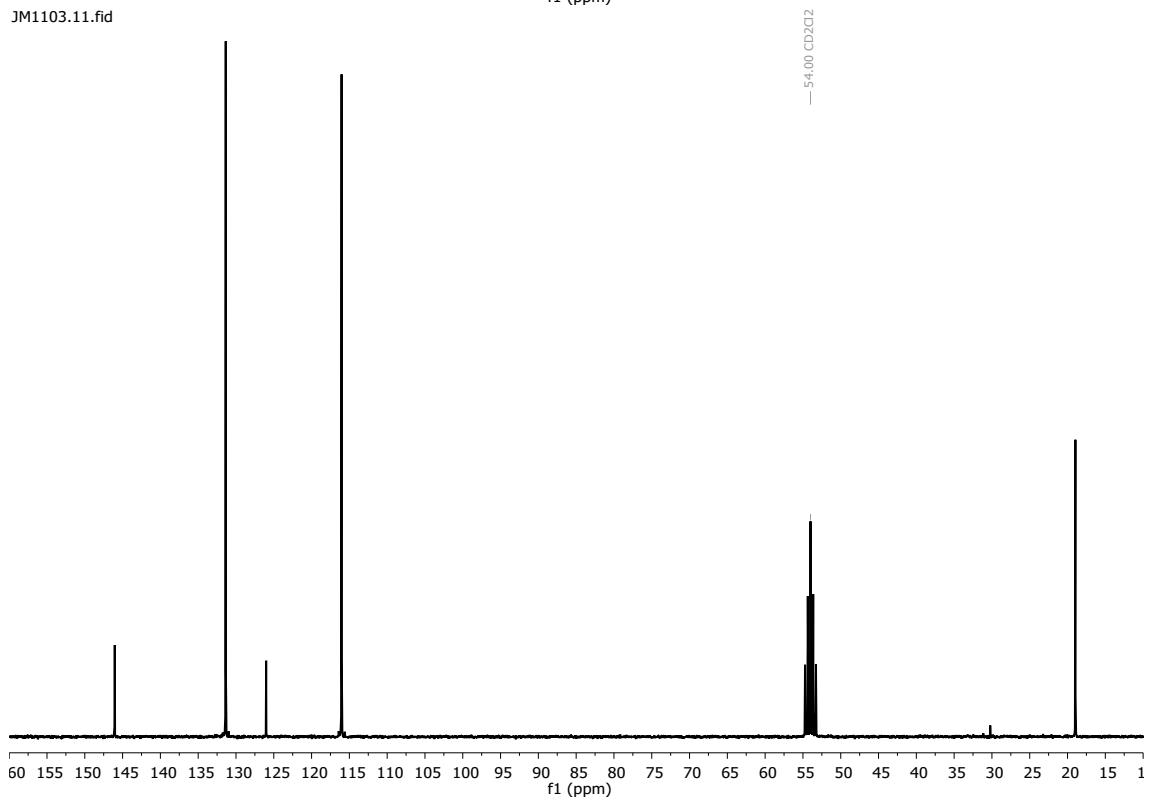

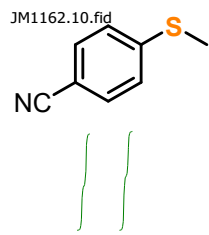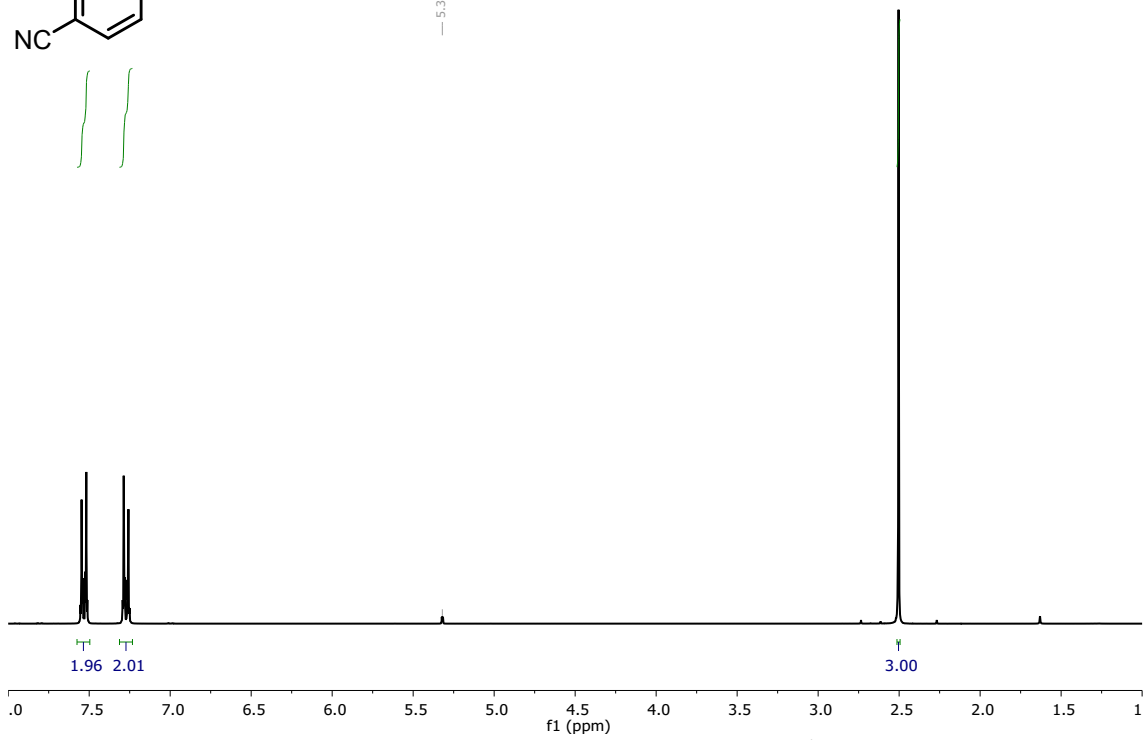

JM1162.11.fid

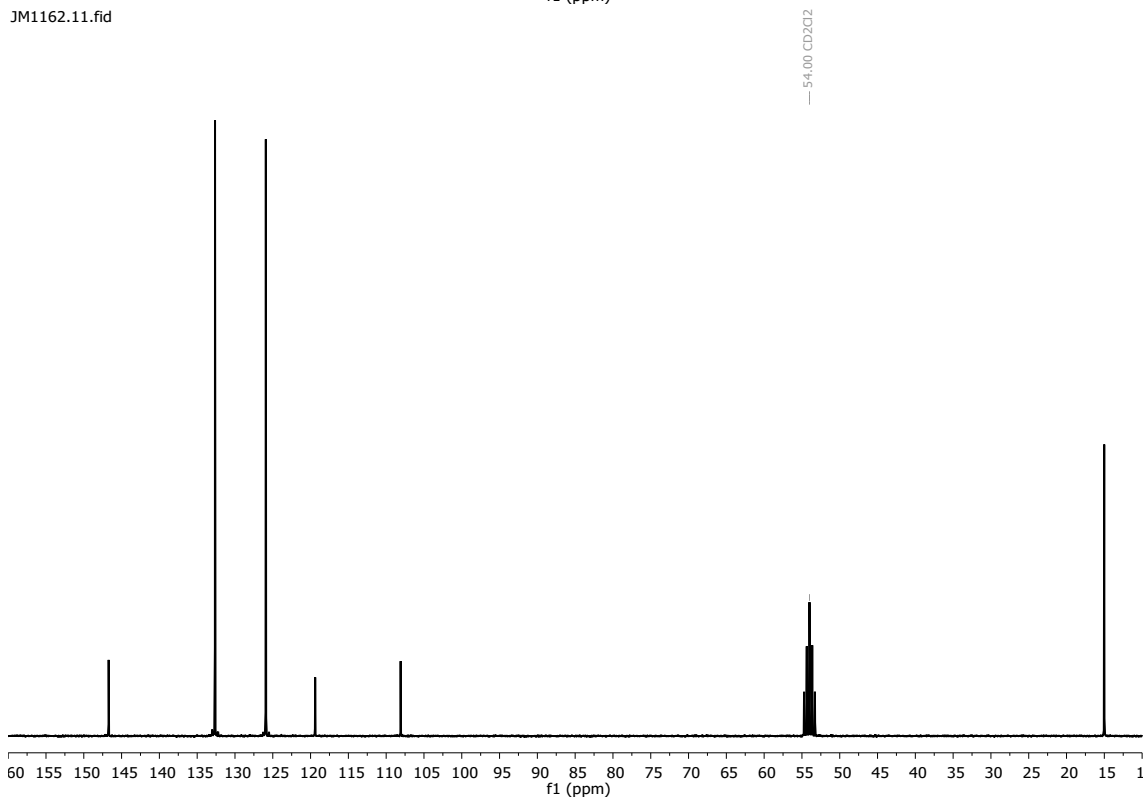

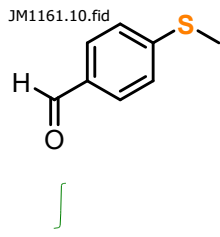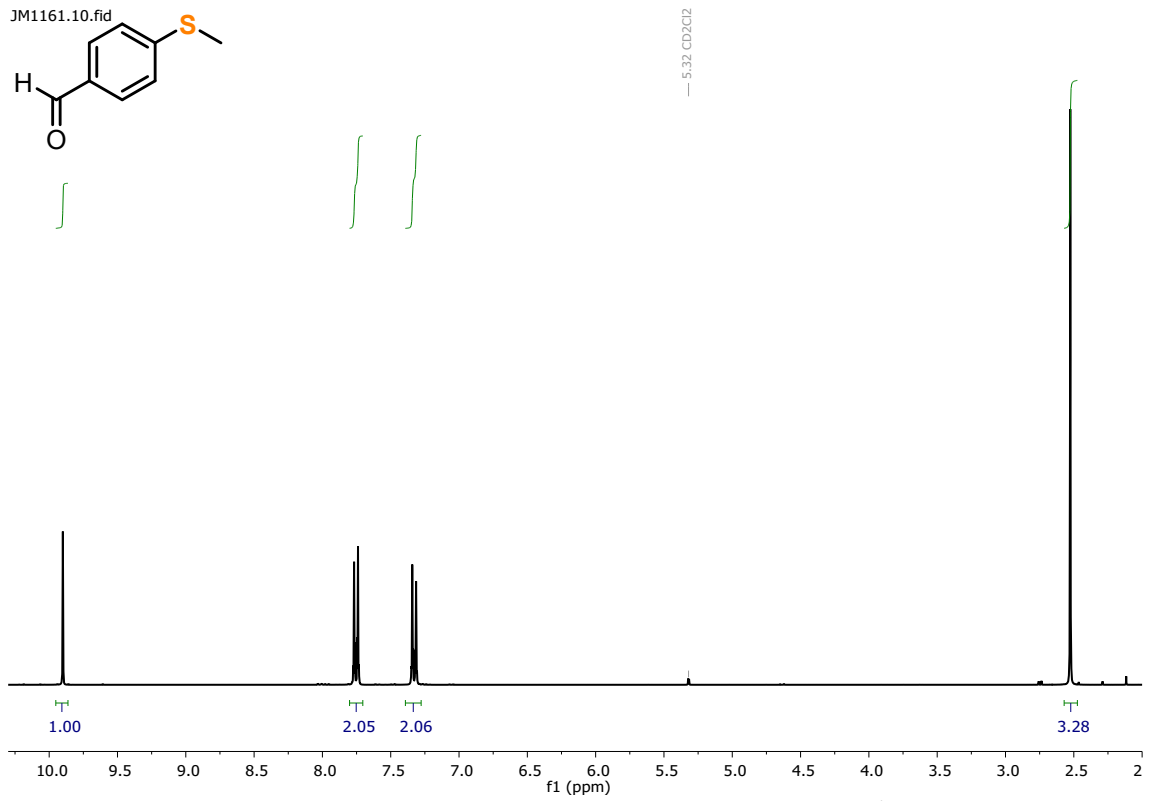

JM1161.11.fid

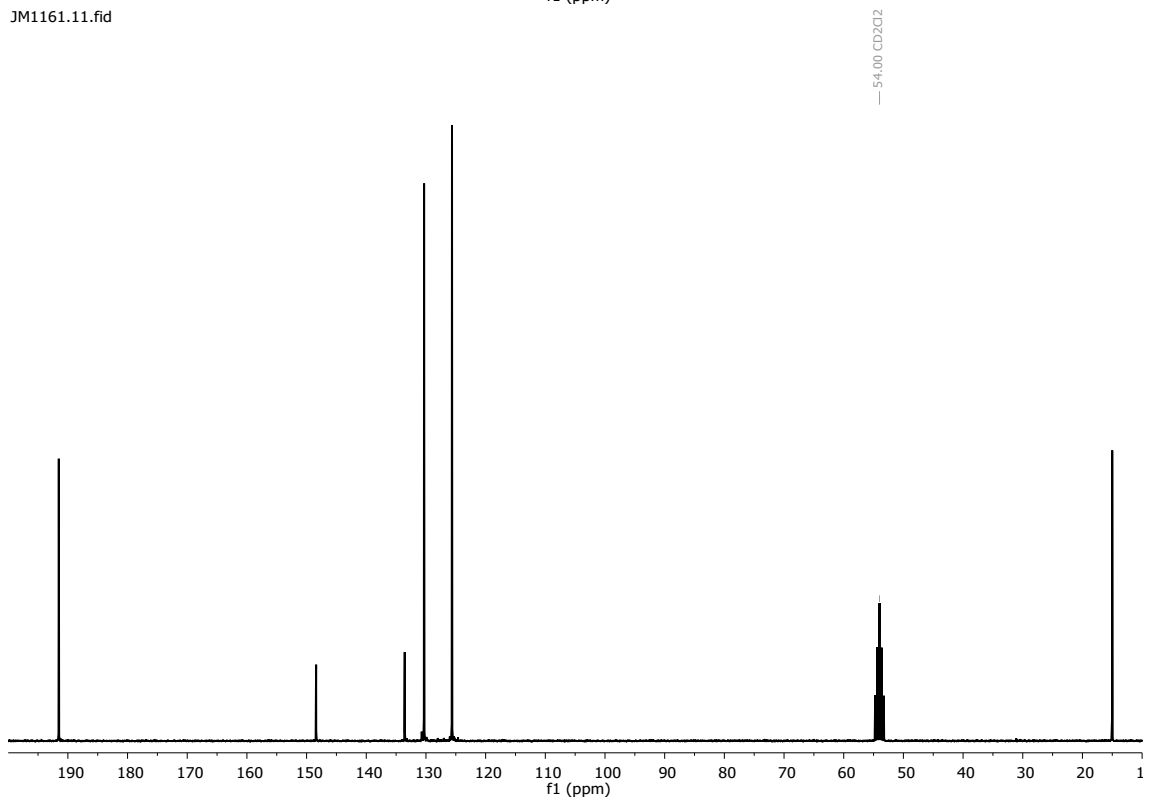

JM1077.10.fid

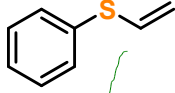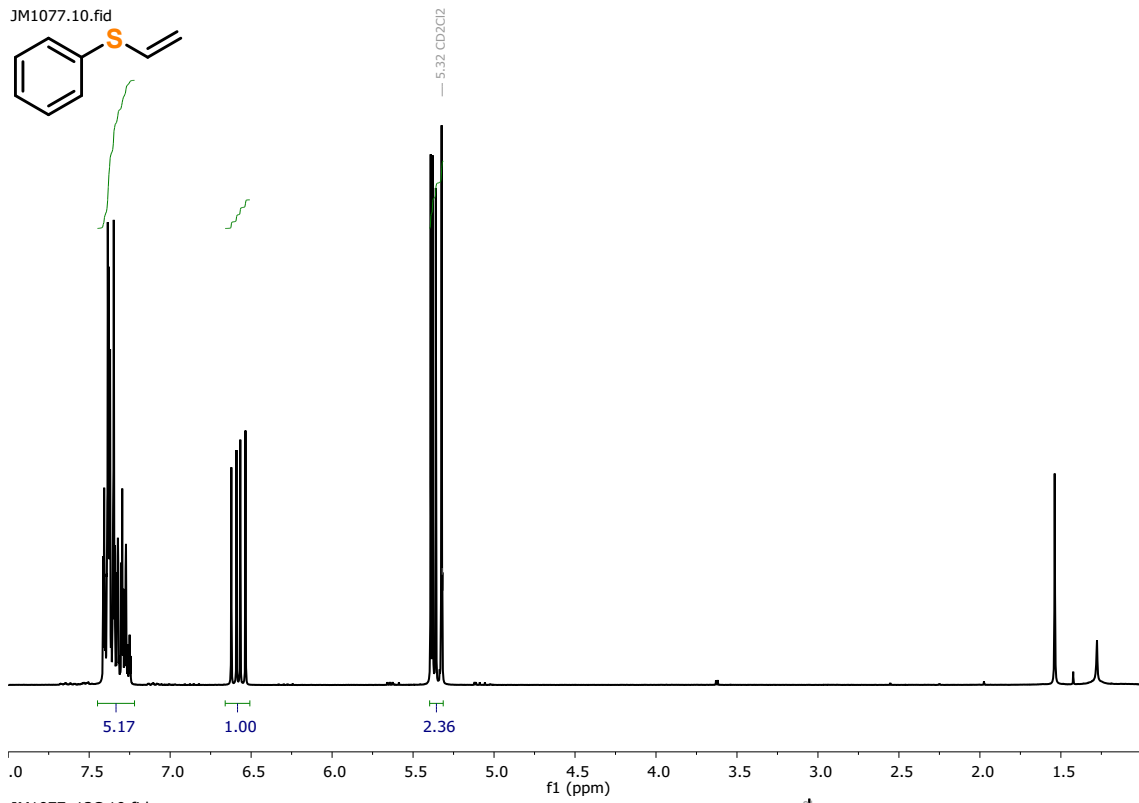

JM1077\_13C.10.fid

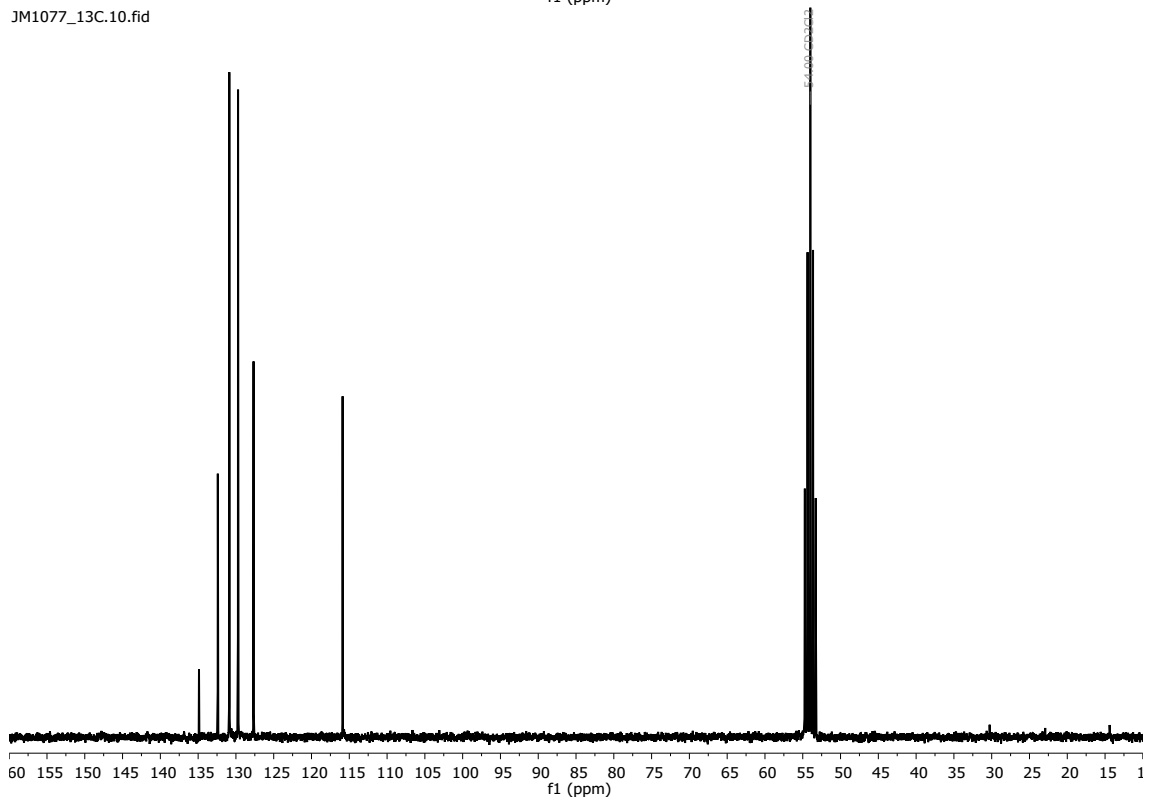

## 9. Mechanistic experiments

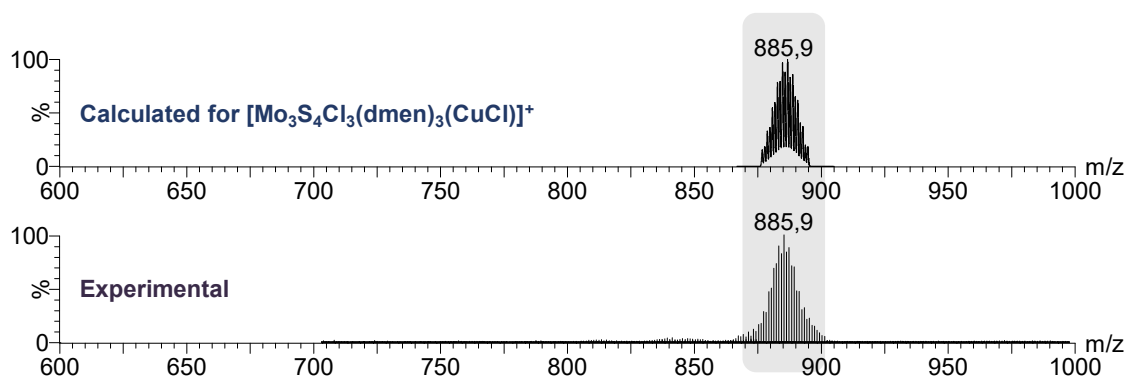

**Figure S3.** HRMS (ESI-TOF) spectra of catalyst **5**<sup>+</sup> after diphenyl sulfoxide hydrogenation in the presence of CuCl. Spectrum registered at 20 V in CH<sub>3</sub>CN.

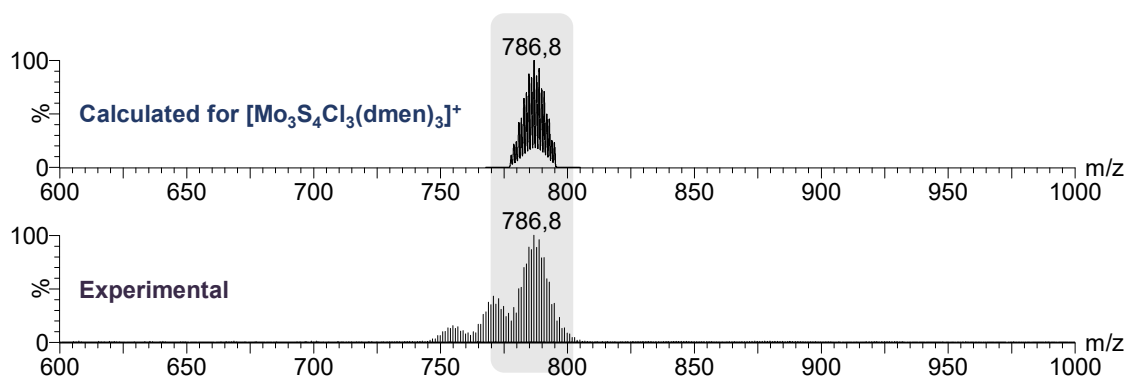

**Figure S4.** HRMS (ESI-TOF) spectra of catalyst **5**<sup>+</sup> after diphenyl sulfoxide hydrogenation in the presence of Et<sub>3</sub>N. Spectrum registered at 20 V in CH<sub>3</sub>CN.

## 10. Computational details

Density functional theory (DFT) calculations were performed with Gaussian 09 (Revision D.01) and Gaussian 16 (Revision C.02).<sup>[5,6]</sup> Geometry optimizations were carried out at the BP86/BS1 level (using Gaussian 09),<sup>[7,8]</sup> or PBE0-D3/BS1 level (using Gaussian 16),<sup>[9]</sup> where Mo and S atoms were described using the SDD relativistic ECP and associated basis set,<sup>[10]</sup> added polarization functions for the latter ( $\zeta = 0.503$ ),<sup>[11]</sup> and the remaining atoms were described with the 6-31G(d,p) basis set (BS1).<sup>[12,13]</sup> Solvent effects (acetonitrile,  $\epsilon = 35.688$ ) were included self-consistently in these optimizations through the PCM method.<sup>[14,15]</sup> All stationary points were characterized at this level of theory by analytical frequency calculations as either minima (all positive eigenvalues) or transition states (one imaginary eigenvalue). Then, intrinsic reaction coordinate (IRC) calculations and subsequent geometry optimizations were used to confirm the minima linked by each transition state. The frequency calculations were also used to obtain the

thermochemistry corrections (zero-point, thermal, and entropic energies) at the experimental temperature (323.15 K) and at the standard 1 atm pressure, on the basis of the IGRRHO (ideal gas/rigid rotor/harmonic oscillator) approach. However, these pressures and temperatures employed do not correspond to the 1 M concentration of the standard state used for species reacting in solution. Therefore, corrections ( $2.1042 \text{ kcal}\cdot\text{mol}^{-1}$ ) were applied to all Gibbs values to change the standard state to 1 M at 323.15 K. This correction has been calculated using the formula  $RT\ln(V_m) = 2.1042 \text{ kcal}\cdot\text{mol}^{-1}$ , where  $V_m = 26.5 \text{ L}\cdot\text{mol}^{-1}$  and corresponds to the molar volume of an ideal gas at 1 atm and 323.15 K.

In addition, single-point dispersion corrections were computed using Grimme's D3 (zero damping) parameter set when BP86/BS1 level was used.<sup>[16]</sup> Thus, the Gibbs energies in acetonitrile ( $G_{\text{solv}}$ ) shown in the text were obtained adding to the potential energies in acetonitrile calculated at BP86/BS1, the Gibbs contribution at the BP86/BS1 level, the dispersion correction, and the standard state correction. When PBE0-D3/BS1 level was employed, Grimme's D3 (zero damping) dispersion corrections were implemented during the optimizations. Finally, the three-dimensional (3D) structures shown in the text were depicted using VESTA software.<sup>[17]</sup>

### 10.1 Absolute energy of computed species

**Table S5.** Electronic energies (E) computed with BP86/BS1(PCM) including solvent effects, correction to Gibbs Free energies (G corr.) at the same level of theory and Grimme's D3 dispersion correction (single-point calculations). Gibbs Free energies ( $G_{\text{solv}}$ ) obtained as the sum of the three previous columns. All values are given in Hartrees.

| Species                                      | $E_{\text{solv}}$ (PCM) | $G_{\text{corr}}$ (PCM) | D3 <sub>corr</sub> (0) | $G_{\text{solv}}$ (PCM,D3) |
|----------------------------------------------|-------------------------|-------------------------|------------------------|----------------------------|
| <b>Reagents and products</b>                 |                         |                         |                        |                            |
| <b>1a</b>                                    | -548.6975               | 0.1352                  | -0.0242                | -548.5866                  |
| <b>2a</b>                                    | -473.5165               | 0.1356                  | -0.0207                | -473.4015                  |
| <b>H<sub>2</sub></b>                         | -1.1766                 | -0.0029                 | 0.0000                 | -1.1794                    |
| <b>H<sub>2</sub>O</b>                        | -76.4246                | 0.0006                  | 0.0000                 | -76.4241                   |
| <b>Cluster species and transition states</b> |                         |                         |                        |                            |
| <b>5<sup>+</sup></b>                         | -2434.5020              | 0.4435                  | -0.1576                | -2434.5370                 |
| <b>TS1</b>                                   | -2435.6523              | 0.4555                  | -0.1631                | -2435.6830                 |
| <b>I1</b>                                    | -2435.6596              | 0.4589                  | -0.1641                | -2435.6870                 |
| <b>RC1</b>                                   | -2984.3638              | 0.6126                  | -0.2009                | -2983.9521                 |
| <b>TS2</b>                                   | -2984.3621              | 0.6116                  | -0.2030                | -2983.9535                 |
| <b>I2</b>                                    | -2984.3670              | 0.6141                  | -0.2008                | -2983.9537                 |
| <b>TS3</b>                                   | -2984.3662              | 0.6152                  | -0.2025                | -2983.9535                 |

**Table S6.** Electronic energies (E) computed with PBE0-D3/BS1(PCM) including solvent effects, correction to Gibbs Free energies (G corr.) at the same level of theory. Gibbs Free energies ( $G_{\text{solv}}$ ) correspond to the sum of the two previous columns. All values are given in Hartrees.

| Species                                      | $E_{\text{solv}}$ (PCM,D3) | $G_{\text{corr}}$ (PCM,D3) | $G_{\text{solv}}$ (PCM,D3) |
|----------------------------------------------|----------------------------|----------------------------|----------------------------|
| <b>Reagents and products</b>                 |                            |                            |                            |
| <b>1a</b>                                    | -548.0678                  | 0.1431                     | -547.9247                  |
| <b>2a</b>                                    | -472.9677                  | 0.1400                     | -472.8276                  |
| <b>H<sub>2</sub></b>                         | -1.1672                    | -0.0026                    | -1.1698                    |
| <b>H<sub>2</sub>O</b>                        | -76.3428                   | 0.0015                     | -76.3413                   |
| <b>Cluster species and transition states</b> |                            |                            |                            |
| <b>5<sup>+</sup></b>                         | -2432.6212                 | 0.4691                     | -2432.1521                 |
| <b>TS1</b>                                   | -2433.76573                | 0.4814                     | -2433.2843                 |
| <b>I1</b>                                    | -2433.7808                 | 0.4852                     | -2433.2956                 |
| <b>RC1</b>                                   | -2981.8744                 | 0.6505                     | -2981.2239                 |
| <b>TS2</b>                                   | -2981.8688                 | 0.6480                     | -2981.2208                 |
| <b>I2</b>                                    | -2981.8726                 | 0.6526                     | -2981.2200                 |
| <b>TS3</b>                                   | -2981.8588                 | 0.6498                     | -2981.2090                 |

**Table S7.** Gibbs Free and potential energy values calculated with different functionals. All values are given in kcal·mol<sup>-1</sup>.

| Stationary Point | $\Delta G$ (kcal·mol <sup>-1</sup> ) |       | $\Delta E$ (kcal·mol <sup>-1</sup> ) |       |
|------------------|--------------------------------------|-------|--------------------------------------|-------|
|                  | PBE0-D3 <sup>[a]</sup>               | BP86  | PBE0-D3                              | BP86  |
| <b>TS1</b>       | 21.5                                 | 20.3  | 14.2                                 | 16.5  |
| <b>I1</b>        | 14.4                                 | 17.1  | 4.7                                  | 12.0  |
| <b>RC1</b>       | 10.0                                 | 14.6  | -11.4                                | 7.7   |
| <b>TS2</b>       | 12.0                                 | 13.8  | -7.9                                 | 8.8   |
| <b>I2</b>        | 12.5                                 | 13.7  | -10.3                                | 5.7   |
| <b>TS3</b>       | 19.4                                 | 13.8  | -1.7                                 | 6.2   |
| <b>Products</b>  | -46.7                                | -37.4 | -47.4                                | -42.0 |

<sup>[a]</sup>Values used in the main text

## 10.2 Analysis of electronic properties of the system

**Table S8.** Energies of the **I1** and **I2** intermediates in different electronic spin states. Electronic energies (E) computed with PBE0-D3/BS1(PCM), correction to Gibbs Free energies (G corr.) at

the same level of theory. Gibbs Free energies ( $G_{\text{solv}}$ ) correspond to the sum of the two previous columns. All values are given in Hartrees.

| <b>Electronic configuration</b> | <b><math>E_{\text{solv}}</math> (PCM,D3)</b> | <b><math>G_{\text{corr}}</math> (PCM,D3)</b> | <b><math>G_{\text{solv}}</math> (PCM,D3)</b> |
|---------------------------------|----------------------------------------------|----------------------------------------------|----------------------------------------------|
| <b>Species: TS1</b>             |                                              |                                              |                                              |
| Singlet                         | -2433.7657                                   | 0.4814                                       | -2433.2843                                   |
| Triplet                         | -2433.7353                                   | 0.4771                                       | -2433.2582                                   |
| <b>Species: I1</b>              |                                              |                                              |                                              |
| Singlet                         | -2433.7808                                   | 0.4852                                       | -2433.2956                                   |
| Triplet                         | -2433.7754                                   | 0.4831                                       | -2433.2923                                   |
| <b>Species: I2</b>              |                                              |                                              |                                              |
| Singlet                         | -2981.8726                                   | 0.6526                                       | -2981.2200                                   |
| Triplet                         | -2981.8739                                   | 0.6592                                       | -2981.2147                                   |

### 10.3 Hydrogen transfer analysis

**Table S9.** Study of the charge distribution by an analysis of the Mulliken charges for **I1** and **I2** at the PBE0-D3/BS1(PCM) theory level. Highlighted hydrogen atoms (in red) are the corresponding to the hydrogenation process.

| <b>I1</b>   |                      | <b>I2</b>   |                      |
|-------------|----------------------|-------------|----------------------|
| <b>Atom</b> | <b>Atomic charge</b> | <b>Atom</b> | <b>Atomic charge</b> |
| Mo 1        | 0.01                 | Mo 1        | -0.11                |
| Mo 2        | -0.12                | Mo 2        | 0.01                 |
| S 3         | 0.15                 | S 3         | 0.10                 |
| Mo 4        | -0.08                | Mo 4        | -0.04                |
| Cl 5        | -0.34                | Cl 5        | -0.40                |
| N 6         | -0.58                | N 6         | -0.59                |
| C 7         | -0.14                | C 7         | -0.14                |
| C 8         | -0.14                | C 8         | -0.14                |
| N 9         | -0.61                | N 9         | -0.59                |
| C 10        | -0.26                | C 10        | -0.26                |
| C 11        | -0.26                | C 11        | -0.25                |
| Cl 12       | -0.35                | Cl 12       | -0.41                |
| S 13        | -0.11                | S 13        | -0.11                |
| N 14        | -0.58                | N 14        | -0.58                |
| C 15        | -0.26                | C 15        | -0.26                |
| N 16        | -0.60                | N 16        | -0.59                |
| C 17        | -0.26                | C 17        | -0.26                |
| C 18        | -0.14                | C 18        | -0.14                |
| C 19        | -0.14                | C 19        | -0.14                |
| N 20        | -0.59                | N 20        | -0.58                |
| C 21        | -0.14                | C 21        | -0.14                |



|             |             |      |       |
|-------------|-------------|------|-------|
| C 22        | -0.14       | C 22 | -0.14 |
| N 23        | -0.59       | N 23 | -0.59 |
| C 24        | -0.26       | C 24 | -0.26 |
| C125        | -0.37       | C125 | -0.38 |
| C 26        | -0.27       | C 26 | -0.25 |
| H 27        | 0.37        | H 27 | 0.37  |
| H 28        | 0.37        | H 28 | 0.38  |
| H 29        | 0.37        | H 29 | 0.37  |
| H 30        | 0.37        | H 30 | 0.37  |
| H 31        | 0.37        | H 31 | 0.37  |
| H 32        | 0.38        | H 32 | 0.37  |
| H 33        | 0.20        | H 33 | 0.19  |
| H 34        | 0.17        | H 34 | 0.16  |
| H 35        | 0.19        | H 35 | 0.19  |
| H 36        | 0.20        | H 36 | 0.20  |
| H 37        | 0.19        | H 37 | 0.18  |
| H 38        | 0.21        | H 38 | 0.20  |
| H 39        | 0.19        | H 39 | 0.18  |
| H 40        | 0.20        | H 40 | 0.19  |
| H 41        | 0.16        | H 41 | 0.16  |
| H 42        | 0.20        | H 42 | 0.19  |
| H 43        | 0.20        | H 43 | 0.19  |
| H 44        | 0.17        | H 44 | 0.17  |
| H 45        | 0.19        | H 45 | 0.18  |
| H 46        | 0.19        | H 46 | 0.18  |
| H 47        | 0.20        | H 47 | 0.20  |
| H 48        | 0.19        | H 48 | 0.18  |
| H 49        | 0.21        | H 49 | 0.20  |
| H 50        | 0.20        | H 50 | 0.20  |
| H 51        | 0.16        | H 51 | 0.16  |
| H 52        | 0.20        | H 52 | 0.19  |
| H 53        | 0.19        | H 53 | 0.19  |
| H 54        | 0.17        | H 54 | 0.16  |
| H 55        | 0.20        | H 55 | 0.18  |
| H 56        | 0.21        | H 56 | 0.20  |
| H 57        | 0.19        | H 57 | 0.18  |
| H 58        | 0.21        | H 58 | 0.20  |
| H 59        | 0.19        | H 59 | 0.18  |
| H 60        | 0.20        | H 60 | 0.19  |
| H 61        | 0.17        | H 61 | 0.15  |
| H 62        | 0.20        | H 62 | 0.19  |
| S 63        | -0.03       | S 63 | -0.35 |
| <b>H 64</b> | <b>0.13</b> | S 64 | -0.20 |
| S 65        | -0.04       | C 65 | -0.12 |
| <b>H 66</b> | <b>0.13</b> | C 66 | -0.09 |
|             |             | C 67 | -0.11 |
|             |             | C 68 | -0.13 |
|             |             | H 69 | 0.20  |
|             |             | C 70 | -0.13 |

|             |             |
|-------------|-------------|
| H 71        | 0.20        |
| C 72        | -0.11       |
| H 73        | 0.18        |
| H 74        | 0.18        |
| H 75        | 0.18        |
| C 76        | -0.09       |
| C 77        | -0.12       |
| C 78        | -0.11       |
| C 79        | -0.13       |
| H 80        | 0.19        |
| C 81        | -0.14       |
| H 82        | 0.19        |
| C 83        | -0.12       |
| H 84        | 0.18        |
| H 85        | 0.18        |
| H 86        | 0.17        |
| S 87        | 0.59        |
| O 88        | -0.50       |
| <b>H 89</b> | <b>0.37</b> |
| <b>H 90</b> | <b>0.12</b> |

**Procedure:** Fragment analysis was performed by treating the organic and inorganic components of **I2** separately. The energies associated with the three possible hydrogen transfer pathways (proton transfer, hydride transfer and hydrogen atom transfer) were obtained as the sum of the energies of the organic and inorganic fragments (see Table S10). These energies were determined using single-point calculations, modifying the charge and multiplicity of the fragments according to each transfer possibility. Thus, the closest energy value to the optimized result (**I2** = 12.5 kcal·mol<sup>-1</sup>) suggests which transfer pathway is involved in the process.

**Table S10.** Study of the character of the transferred hydrogen atom to the sulfoxide substrate in intermediate **I2**. Electronic energies (E) computed with single-point PBE0-D3/BS1(PCM) calculations on the optimized **I2** geometry of the corresponding fragment, correction to Gibbs Free energies (G corr.) at the same level of theory. Gibbs Free energies obtained as the sum of the two previous columns. All values are given in Hartrees

| Fragment                | E <sub>solv</sub> (PCM,D3) | G <sub>corr</sub> (PCM,D3) | G <sub>solv</sub> (PCM,D3) |
|-------------------------|----------------------------|----------------------------|----------------------------|
| <b>Proton transfer</b>  |                            |                            |                            |
| Inorganic               | -2433.3408                 | 0.4748                     | -2432.8659                 |
| Organic                 | -548.4956                  | 0.1556                     | -548.3400                  |
| <b>Total</b>            | <b>-2981.8364</b>          | <b>0.6304</b>              | <b>-2981.2059</b>          |
| <b>Hydride transfer</b> |                            |                            |                            |
| Inorganic               | -2432.9795                 | 0.4755                     | -2432.5040                 |
| Organic                 | -548.6356                  | 0.1512                     | -548.4845                  |

|                                     |            |        |            |
|-------------------------------------|------------|--------|------------|
| <b>Total</b>                        | -2981.6151 | 0.6272 | -2980.9885 |
| <b>Hydrogen atom transfer (HAT)</b> |            |        |            |
| Inorganic                           | -2433.1897 | 0.4753 | -2432.7144 |
| Organic                             | -548.5930  | 0.1531 | -548.4399  |
| <b>Total</b>                        | -2981.7827 | 0.6284 | -2982.1543 |

#### 10.4 3D views of the cluster units

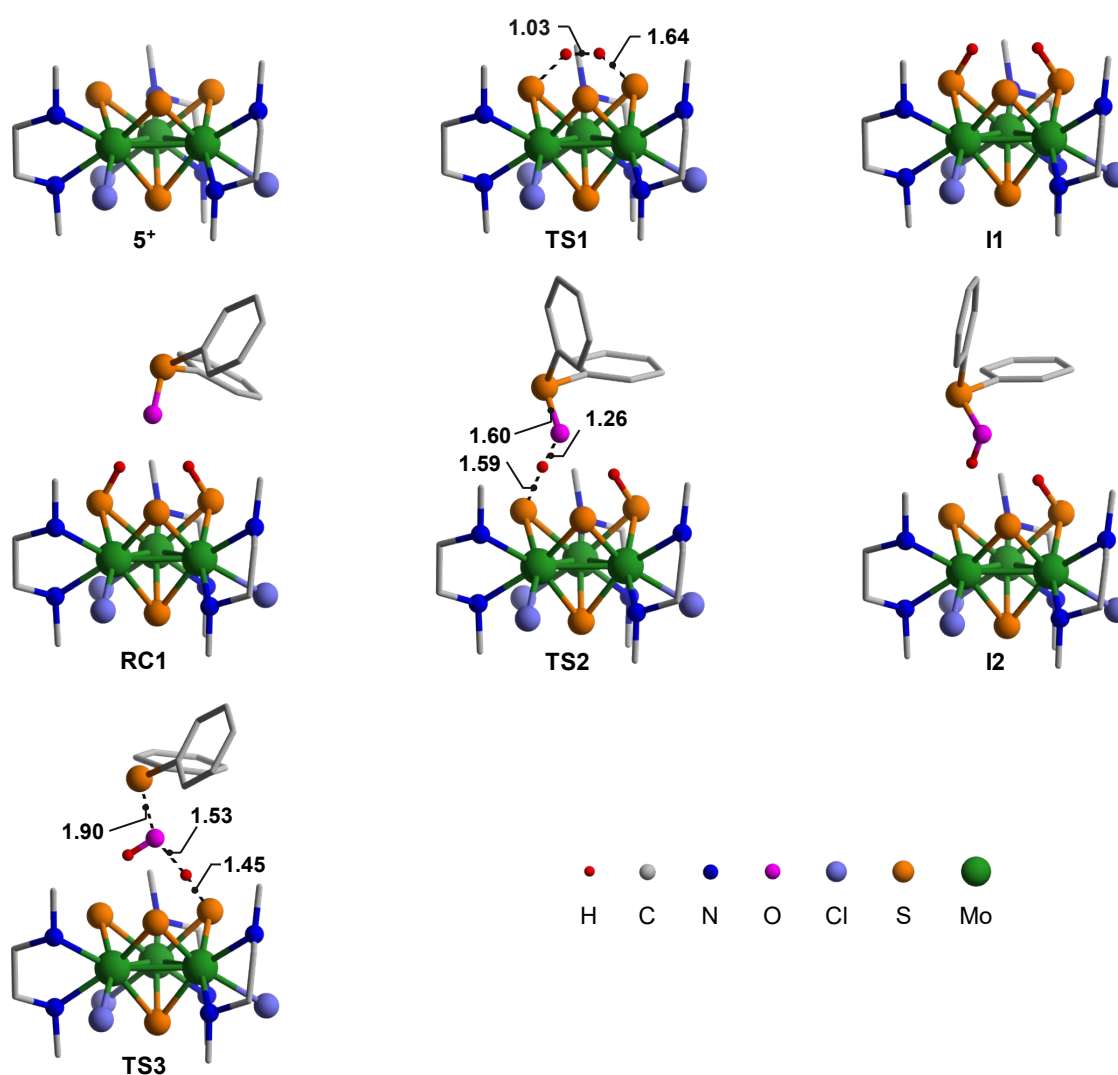

**Figure S5.** Optimized structures of intermediates and transition states for the Gibbs energy profile represented in Figure 5. Selected distances are given in Å.

#### 10.5 Cartesian coordinates of the optimized structures

### 10.5.1 Optimized with BP86 functional

Stationary point: H<sub>2</sub>

|   | x       | y      | z       |
|---|---------|--------|---------|
| H | 0.1433  | 2.5505 | -0.0642 |
| H | -0.6076 | 2.5505 | -0.0642 |

Stationary point: H<sub>2</sub>O

|   | x       | y      | z       |
|---|---------|--------|---------|
| O | -1.5137 | 2.5201 | -0.0642 |
| H | -0.5409 | 2.5795 | -0.0642 |
| H | -1.7824 | 3.4568 | -0.0642 |

Stationary point: Diphenyl sulfoxide (1a)

|   | x       | y       | z       |
|---|---------|---------|---------|
| C | -5.4007 | 1.9985  | 1.2796  |
| C | -4.2912 | 1.7537  | 0.4520  |
| C | -3.2027 | 2.6370  | 0.5105  |
| C | -3.2028 | 3.7639  | 1.3421  |
| C | -4.3187 | 3.9993  | 2.1615  |
| C | -5.4132 | 3.1162  | 2.1328  |
| H | -6.2590 | 1.3197  | 1.2494  |
| H | -4.2822 | 0.8921  | -0.2244 |
| H | -2.3390 | 4.4370  | 1.3224  |
| H | -4.3354 | 4.8738  | 2.8202  |
| H | -6.2830 | 3.3048  | 2.7699  |
| S | -1.7439 | 2.3826  | -0.5978 |
| O | -0.9693 | 3.7249  | -0.5828 |
| C | -0.7990 | 1.2479  | 0.5165  |
| C | -1.0330 | -0.1349 | 0.4706  |
| C | 0.1855  | 1.8085  | 1.3400  |
| C | -0.2717 | -0.9736 | 1.3028  |
| H | -1.7902 | -0.5570 | -0.1991 |
| C | 0.9419  | 0.9593  | 2.1641  |
| H | 0.3469  | 2.8913  | 1.3119  |
| C | 0.7111  | -0.4281 | 2.1478  |
| H | -0.4414 | -2.0548 | 1.2825  |
| H | 1.7137  | 1.3805  | 2.8166  |
| H | 1.3050  | -1.0876 | 2.7885  |

Stationary point: Diphenyl sulfide (2a)

|  | x | y | z |
|--|---|---|---|
|--|---|---|---|

|   |         |         |         |
|---|---------|---------|---------|
| C | -4.9927 | 1.9597  | 0.2844  |
| C | -3.5955 | 2.0727  | 0.3429  |
| C | -3.0078 | 3.0388  | 1.1861  |
| C | -3.8229 | 3.8963  | 1.9524  |
| C | -5.2215 | 3.7913  | 1.8664  |
| C | -5.8099 | 2.8205  | 1.0394  |
| H | -5.4442 | 1.2035  | -0.3662 |
| H | -2.9611 | 1.4135  | -0.2569 |
| H | -3.3639 | 4.6349  | 2.6174  |
| H | -5.8494 | 4.4612  | 2.4628  |
| H | -6.8995 | 2.7327  | 0.9835  |
| S | -1.2204 | 3.2955  | 1.2474  |
| C | -0.5518 | 1.6194  | 1.3382  |
| C | -1.1099 | 0.6341  | 2.1790  |
| C | 0.6136  | 1.3362  | 0.5970  |
| C | -0.5096 | -0.6314 | 2.2603  |
| H | -2.0099 | 0.8575  | 2.7597  |
| C | 1.2204  | 0.0736  | 0.7054  |
| H | 1.0380  | 2.0974  | -0.0657 |
| C | 0.6589  | -0.9148 | 1.5303  |
| H | -0.9512 | -1.3949 | 2.9091  |
| H | 2.1258  | -0.1395 | 0.1278  |
| H | 1.1270  | -1.9015 | 1.6036  |

**Stationary point: Cluster 5<sup>+</sup>**

|    | x       | y       | z       |
|----|---------|---------|---------|
| S  | -0.1981 | -2.0645 | -0.1981 |
| Mo | -1.3812 | -0.4173 | 0.9655  |
| S  | 0.3388  | 1.1371  | 1.1042  |
| Mo | -0.9242 | 1.7297  | -0.7705 |
| S  | -2.9345 | 0.4677  | -0.6011 |
| Mo | -1.3479 | -0.8348 | -1.8024 |
| Cl | -2.5618 | -0.1931 | -3.9256 |
| N  | 0.5197  | 3.4924  | -1.1184 |
| C  | 0.2565  | 4.0870  | -2.4657 |
| C  | -1.2413 | 4.2302  | -2.6889 |
| N  | -1.9391 | 2.9200  | -2.4993 |
| C  | -3.4182 | 3.1181  | -2.5194 |
| C  | 1.9843  | 3.3405  | -0.8859 |
| Cl | -2.0509 | 3.5502  | 0.5826  |
| S  | 0.3806  | 0.6391  | -2.3525 |
| N  | -0.4590 | -2.3540 | -3.2939 |
| C  | 1.0156  | -2.5181 | -3.4383 |
| N  | -2.9476 | -2.5395 | -1.8593 |
| C  | -4.4043 | -2.2161 | -1.8705 |
| C  | -1.1208 | -3.6814 | -3.1008 |

|    |         |         |         |
|----|---------|---------|---------|
| C  | -2.6236 | -3.4976 | -2.9621 |
| N  | -0.5015 | -1.2292 | 2.9392  |
| C  | -0.7833 | -0.2556 | 4.0390  |
| C  | -2.2268 | 0.2148  | 3.9568  |
| N  | -2.5246 | 0.7898  | 2.6081  |
| C  | -3.9867 | 1.0568  | 2.4750  |
| Cl | -3.1284 | -2.1355 | 1.5999  |
| C  | 0.9073  | -1.7110 | 3.0084  |
| H  | -0.8180 | -1.9569 | -4.1770 |
| H  | -2.7611 | -3.0026 | -0.9548 |
| H  | -1.1190 | -2.0446 | 3.0840  |
| H  | -2.0540 | 1.7063  | 2.5266  |
| H  | 0.1567  | 4.1529  | -0.4122 |
| H  | -1.7178 | 2.3082  | -3.3020 |
| H  | 1.4648  | -1.5541 | -3.7133 |
| H  | 1.2430  | -3.2644 | -4.2196 |
| H  | 1.4405  | -2.8530 | -2.4804 |
| H  | -0.6871 | -4.1411 | -2.1967 |
| H  | -0.9017 | -4.3454 | -3.9571 |
| H  | -3.0453 | -3.0753 | -3.8896 |
| H  | -3.1127 | -4.4712 | -2.7788 |
| H  | -4.6616 | -1.6894 | -0.9418 |
| H  | -4.9988 | -3.1444 | -1.9386 |
| H  | -4.6204 | -1.5735 | -2.7362 |
| H  | 1.0569  | -2.5067 | 2.2660  |
| H  | 1.1295  | -2.1022 | 4.0167  |
| H  | 1.5889  | -0.8771 | 2.7838  |
| H  | -0.5948 | -0.7245 | 5.0223  |
| H  | -0.0822 | 0.5883  | 3.9249  |
| H  | -2.4326 | 0.9615  | 4.7446  |
| H  | -2.9163 | -0.6334 | 4.1038  |
| H  | -4.1583 | 1.6739  | 1.5829  |
| H  | -4.3564 | 1.5953  | 3.3655  |
| H  | -4.5162 | 0.0983  | 2.3743  |
| H  | 2.1575  | 3.0145  | 0.1488  |
| H  | 2.5020  | 4.3000  | -1.0604 |
| H  | 2.3850  | 2.5807  | -1.5730 |
| H  | 0.7106  | 3.4201  | -3.2183 |
| H  | 0.7448  | 5.0753  | -2.5494 |
| H  | -1.6733 | 4.9329  | -1.9566 |
| H  | -1.4410 | 4.6270  | -3.7004 |
| H  | -3.9093 | 2.1395  | -2.6042 |
| H  | -3.7052 | 3.7453  | -3.3818 |
| H  | -3.7242 | 3.6091  | -1.5845 |

Stationary point: TS1

|    | x       | y       | z       |
|----|---------|---------|---------|
| Mo | -1.4185 | -0.4307 | 0.9462  |
| Mo | -0.9366 | 1.6957  | -0.7986 |
| S  | -2.9804 | 0.4810  | -0.5948 |
| Mo | -1.3630 | -0.7798 | -1.8072 |
| Cl | -2.5437 | -0.1344 | -3.9241 |
| N  | 0.5274  | 3.4574  | -1.1502 |
| C  | 0.2555  | 4.0452  | -2.4965 |
| C  | -1.2434 | 4.2044  | -2.6914 |
| N  | -1.9530 | 2.9029  | -2.4781 |
| C  | -3.4285 | 3.1283  | -2.4554 |
| C  | 1.9930  | 3.3164  | -0.9215 |
| Cl | -1.9391 | 3.4968  | 0.6771  |
| S  | 0.4740  | 0.5897  | -2.2872 |
| N  | -0.4658 | -2.3167 | -3.3013 |
| C  | 1.0041  | -2.4664 | -3.4910 |
| N  | -2.9331 | -2.5098 | -1.8267 |
| C  | -4.3930 | -2.1997 | -1.8529 |
| C  | -1.0999 | -3.6483 | -3.0603 |
| C  | -2.6032 | -3.4869 | -2.9103 |
| N  | -0.5490 | -1.2362 | 2.9451  |
| C  | -0.8078 | -0.2320 | 4.0206  |
| C  | -2.2486 | 0.2412  | 3.9364  |
| N  | -2.5529 | 0.7849  | 2.5768  |
| C  | -4.0221 | 1.0161  | 2.4471  |
| Cl | -3.0915 | -2.2334 | 1.5392  |
| C  | 0.8405  | -1.7648 | 3.0425  |
| H  | -0.8559 | -1.9421 | -4.1810 |
| H  | -2.7548 | -2.9535 | -0.9087 |
| H  | -1.1935 | -2.0290 | 3.0995  |
| H  | -2.1064 | 1.7128  | 2.4780  |
| H  | 0.1647  | 4.1178  | -0.4434 |
| H  | -1.7633 | 2.2845  | -3.2863 |
| H  | 1.4324  | -1.5043 | -3.8022 |
| H  | 1.2148  | -3.2286 | -4.2619 |
| H  | 1.4658  | -2.7758 | -2.5414 |
| H  | -0.6485 | -4.0723 | -2.1470 |
| H  | -0.8779 | -4.3362 | -3.8970 |
| H  | -3.0391 | -3.0922 | -3.8440 |
| H  | -3.0753 | -4.4642 | -2.7032 |
| H  | -4.6627 | -1.6665 | -0.9318 |
| H  | -4.9801 | -3.1331 | -1.9182 |
| H  | -4.6064 | -1.5661 | -2.7263 |
| H  | 0.9721  | -2.5838 | 2.3222  |
| H  | 1.0368  | -2.1407 | 4.0620  |
| H  | 1.5567  | -0.9611 | 2.8142  |
| H  | -0.6129 | -0.6755 | 5.0145  |

|   |         |         |         |
|---|---------|---------|---------|
| H | -0.1014 | 0.6032  | 3.8774  |
| H | -2.4511 | 1.0034  | 4.7101  |
| H | -2.9362 | -0.6049 | 4.1061  |
| H | -4.2130 | 1.6262  | 1.5543  |
| H | -4.4048 | 1.5460  | 3.3377  |
| H | -4.5288 | 0.0450  | 2.3475  |
| H | 2.1713  | 2.9945  | 0.1139  |
| H | 2.5030  | 4.2796  | -1.0986 |
| H | 2.3984  | 2.5587  | -1.6083 |
| H | 0.6877  | 3.3659  | -3.2509 |
| H | 0.7536  | 5.0273  | -2.5966 |
| H | -1.6525 | 4.9163  | -1.9542 |
| H | -1.4621 | 4.5969  | -3.7004 |
| H | -3.9405 | 2.1612  | -2.5443 |
| H | -3.7265 | 3.7782  | -3.2969 |
| H | -3.6992 | 3.6056  | -1.5022 |
| S | 0.4531  | 0.9877  | 1.0133  |
| H | 1.4158  | 0.0100  | 0.1669  |
| S | -0.0367 | -1.9501 | -0.2021 |
| H | 1.2555  | -0.9834 | -0.2555 |

**Stationary point: I1**

|    | x       | y       | z       |
|----|---------|---------|---------|
| Mo | -1.4126 | -0.4311 | 0.9571  |
| Mo | -0.9327 | 1.6856  | -0.7879 |
| S  | -2.9791 | 0.4808  | -0.5757 |
| Mo | -1.3581 | -0.7716 | -1.7885 |
| Cl | -2.5210 | -0.0865 | -3.9016 |
| N  | 0.5201  | 3.4602  | -1.1690 |
| C  | 0.2421  | 4.0118  | -2.5281 |
| C  | -1.2576 | 4.1670  | -2.7129 |
| N  | -1.9653 | 2.8713  | -2.4618 |
| C  | -3.4388 | 3.1057  | -2.4214 |
| C  | 1.9866  | 3.3445  | -0.9358 |
| Cl | -1.9048 | 3.4800  | 0.7154  |
| S  | 0.5253  | 0.5688  | -2.2447 |
| N  | -0.4756 | -2.3014 | -3.3096 |
| C  | 0.9905  | -2.4673 | -3.5112 |
| N  | -2.9383 | -2.4928 | -1.8293 |
| C  | -4.3962 | -2.1723 | -1.8421 |
| C  | -1.1249 | -3.6297 | -3.0942 |
| C  | -2.6250 | -3.4531 | -2.9327 |
| N  | -0.5596 | -1.2304 | 2.9703  |
| C  | -0.8399 | -0.2290 | 4.0422  |
| C  | -2.2802 | 0.2377  | 3.9321  |
| N  | -2.5620 | 0.7836  | 2.5679  |



|    |         |         |         |
|----|---------|---------|---------|
| C  | -4.0308 | 1.0106  | 2.4221  |
| Cl | -3.0558 | -2.2653 | 1.5125  |
| C  | 0.8301  | -1.7531 | 3.0913  |
| H  | -0.8641 | -1.9043 | -4.1799 |
| H  | -2.7610 | -2.9560 | -0.9202 |
| H  | -1.2023 | -2.0266 | 3.1148  |
| H  | -2.1202 | 1.7155  | 2.4812  |
| H  | 0.1486  | 4.1323  | -0.4780 |
| H  | -1.7904 | 2.2352  | -3.2614 |
| H  | 1.4311  | -1.5031 | -3.7978 |
| H  | 1.1865  | -3.2118 | -4.3031 |
| H  | 1.4539  | -2.8103 | -2.5738 |
| H  | -0.6739 | -4.0794 | -2.1932 |
| H  | -0.9165 | -4.3020 | -3.9470 |
| H  | -3.0611 | -3.0356 | -3.8565 |
| H  | -3.1078 | -4.4286 | -2.7423 |
| H  | -4.6577 | -1.6530 | -0.9110 |
| H  | -4.9907 | -3.1001 | -1.9208 |
| H  | -4.6093 | -1.5222 | -2.7034 |
| H  | 0.9788  | -2.5695 | 2.3714  |
| H  | 1.0094  | -2.1314 | 4.1131  |
| H  | 1.5471  | -0.9456 | 2.8797  |
| H  | -0.6607 | -0.6727 | 5.0390  |
| H  | -0.1344 | 0.6093  | 3.9132  |
| H  | -2.5011 | 0.9972  | 4.7034  |
| H  | -2.9672 | -0.6119 | 4.0867  |
| H  | -4.2138 | 1.6269  | 1.5321  |
| H  | -4.4257 | 1.5326  | 3.3121  |
| H  | -4.5331 | 0.0386  | 2.3096  |
| H  | 2.1689  | 3.0664  | 0.1116  |
| H  | 2.4859  | 4.3061  | -1.1494 |
| H  | 2.3996  | 2.5657  | -1.5937 |
| H  | 0.6670  | 3.3102  | -3.2662 |
| H  | 0.7402  | 4.9905  | -2.6585 |
| H  | -1.6592 | 4.8969  | -1.9892 |
| H  | -1.4875 | 4.5349  | -3.7285 |
| H  | -3.9584 | 2.1414  | -2.4933 |
| H  | -3.7443 | 3.7485  | -3.2658 |
| H  | -3.6935 | 3.5949  | -1.4697 |
| S  | 0.4811  | 1.0428  | 1.0795  |
| H  | 1.4820  | 0.3309  | 0.4028  |
| S  | -0.0432 | -2.0403 | -0.1822 |
| H  | 1.2014  | -1.4118 | -0.3334 |

**Stationary point: RC1**

|  | x | y | z |
|--|---|---|---|
|--|---|---|---|

|    |         |         |         |
|----|---------|---------|---------|
| Mo | -1.5123 | -0.8546 | 0.9395  |
| Mo | -0.9551 | 1.7588  | 0.1898  |
| S  | -3.0894 | 0.7232  | 0.1062  |
| Mo | -1.7412 | -0.1655 | -1.6439 |
| Cl | -2.8448 | 1.4653  | -3.2543 |
| N  | 0.6195  | 3.4654  | 0.3362  |
| C  | 0.3095  | 4.4975  | -0.6966 |
| C  | -1.1766 | 4.8068  | -0.6647 |
| N  | -1.9853 | 3.5616  | -0.8425 |
| C  | -3.4187 | 3.8634  | -0.5538 |
| C  | 2.0815  | 3.1877  | 0.3816  |
| Cl | -1.6322 | 2.8983  | 2.3475  |
| S  | 0.2606  | 1.2041  | -1.8180 |
| N  | -1.1789 | -1.0768 | -3.7132 |
| C  | 0.2361  | -1.3048 | -4.1165 |
| N  | -3.5480 | -1.5040 | -2.1555 |
| C  | -4.9389 | -1.0237 | -1.9088 |
| C  | -1.9944 | -2.3091 | -3.9195 |
| C  | -3.4404 | -2.0221 | -3.5554 |
| N  | -0.5984 | -2.4910 | 2.3242  |
| C  | -0.6410 | -2.0104 | 3.7378  |
| C  | -2.0004 | -1.4012 | 4.0356  |
| N  | -2.3215 | -0.3071 | 3.0685  |
| C  | -3.7396 | 0.1204  | 3.2477  |
| Cl | -3.3852 | -2.5346 | 1.0308  |
| C  | 0.7112  | -3.1349 | 2.0338  |
| H  | -1.5633 | -0.3444 | -4.3322 |
| H  | -3.3846 | -2.2866 | -1.4962 |
| H  | -1.3291 | -3.2136 | 2.2207  |
| H  | -1.7444 | 0.5219  | 3.2957  |
| H  | 0.3495  | 3.8545  | 1.2546  |
| H  | -1.9512 | 3.2782  | -1.8380 |
| H  | 0.7767  | -0.3482 | -4.1028 |
| H  | 0.2813  | -1.7346 | -5.1330 |
| H  | 0.7100  | -1.9978 | -3.4058 |
| H  | -1.5689 | -3.1006 | -3.2795 |
| H  | -1.9310 | -2.6448 | -4.9715 |
| H  | -3.8525 | -1.2414 | -4.2180 |
| H  | -4.0587 | -2.9296 | -3.6754 |
| H  | -5.0848 | -0.8784 | -0.8308 |
| H  | -5.6688 | -1.7660 | -2.2778 |
| H  | -5.0826 | -0.0686 | -2.4355 |
| H  | 0.6833  | -3.5860 | 1.0329  |
| H  | 0.9320  | -3.9135 | 2.7856  |
| H  | 1.5041  | -2.3731 | 2.0614  |
| H  | -0.4431 | -2.8459 | 4.4348  |
| H  | 0.1652  | -1.2670 | 3.8605  |

|   |         |         |         |
|---|---------|---------|---------|
| H | -2.0313 | -1.0207 | 5.0725  |
| H | -2.7911 | -2.1640 | 3.9318  |
| H | -3.9037 | 1.0569  | 2.6991  |
| H | -3.9583 | 0.2825  | 4.3187  |
| H | -4.3998 | -0.6644 | 2.8501  |
| H | 2.3007  | 2.5199  | 1.2258  |
| H | 2.6475  | 4.1285  | 0.5036  |
| H | 2.3926  | 2.7012  | -0.5550 |
| H | 0.6176  | 4.0962  | -1.6773 |
| H | 0.8916  | 5.4187  | -0.5083 |
| H | -1.4529 | 5.2331  | 0.3152  |
| H | -1.4358 | 5.5491  | -1.4408 |
| H | -4.0414 | 3.0334  | -0.9125 |
| H | -3.7234 | 4.7935  | -1.0665 |
| H | -3.5468 | 3.9795  | 0.5323  |
| S | 0.5268  | 0.3605  | 1.4853  |
| S | -0.4414 | -1.9569 | -0.8465 |
| C | 5.5735  | 0.3385  | 0.8886  |
| C | 5.9312  | 0.7829  | -0.3940 |
| C | 6.1782  | 0.8459  | 2.0492  |
| C | 6.9422  | 1.7484  | -0.5128 |
| H | 5.4149  | 0.3865  | -1.2739 |
| C | 7.1942  | 1.8088  | 1.9139  |
| H | 5.8634  | 0.5030  | 3.0405  |
| C | 7.5751  | 2.2560  | 0.6379  |
| H | 7.2363  | 2.1063  | -1.5045 |
| H | 7.6780  | 2.2146  | 2.8077  |
| H | 8.3627  | 3.0092  | 0.5377  |
| C | 5.1683  | -2.4105 | 0.6083  |
| C | 6.0016  | -3.0265 | 1.5560  |
| C | 4.9771  | -2.9407 | -0.6742 |
| C | 6.6816  | -4.1997 | 1.1890  |
| H | 6.1236  | -2.6053 | 2.5596  |
| C | 5.6625  | -4.1162 | -1.0254 |
| H | 4.2984  | -2.4358 | -1.3687 |
| C | 6.5134  | -4.7420 | -0.0979 |
| H | 7.3380  | -4.6925 | 1.9129  |
| H | 5.5276  | -4.5437 | -2.0240 |
| H | 7.0422  | -5.6591 | -0.3751 |
| S | 4.2291  | -0.8979 | 1.0844  |
| O | 3.2288  | -0.6501 | -0.0969 |
| H | 1.5118  | -0.1748 | 0.6276  |
| H | 1.2450  | 0.3193  | -1.3857 |

**Stationary point: TS2**

|  | x | y | z |
|--|---|---|---|
|--|---|---|---|

|    |         |         |         |
|----|---------|---------|---------|
| Mo | -1.4131 | -0.9925 | 0.5822  |
| Mo | -0.8611 | 1.6077  | -0.2075 |
| S  | -2.9900 | 0.5616  | -0.2972 |
| Mo | -1.6153 | -0.3303 | -2.0204 |
| Cl | -2.7327 | 1.2599  | -3.6757 |
| N  | 0.7022  | 3.3220  | -0.0530 |
| C  | 0.4082  | 4.3403  | -1.1033 |
| C  | -1.0797 | 4.6452  | -1.1059 |
| N  | -1.8806 | 3.3963  | -1.2845 |
| C  | -3.3205 | 3.6946  | -1.0321 |
| C  | 2.1634  | 3.0525  | 0.0249  |
| Cl | -1.6007 | 2.7968  | 1.9170  |
| S  | 0.3898  | 1.0246  | -2.1882 |
| N  | -1.0283 | -1.2691 | -4.0736 |
| C  | 0.3904  | -1.4897 | -4.4643 |
| N  | -3.4055 | -1.7074 | -2.5255 |
| C  | -4.8043 | -1.2446 | -2.2962 |
| C  | -1.8289 | -2.5124 | -4.2690 |
| C  | -3.2809 | -2.2387 | -3.9180 |
| N  | -0.5328 | -2.6089 | 2.0114  |
| C  | -0.5957 | -2.1064 | 3.4157  |
| C  | -1.9586 | -1.4906 | 3.6829  |
| N  | -2.2653 | -0.4152 | 2.6921  |
| C  | -3.6833 | 0.0183  | 2.8438  |
| Cl | -3.2968 | -2.6842 | 0.6855  |
| C  | 0.7725  | -3.2725 | 1.7552  |
| H  | -1.4165 | -0.5479 | -4.7032 |
| H  | -3.2349 | -2.4798 | -1.8571 |
| H  | -1.2714 | -3.3232 | 1.9045  |
| H  | -1.6834 | 0.4142  | 2.9040  |
| H  | 0.4103  | 3.7194  | 0.8552  |
| H  | -1.8226 | 3.0970  | -2.2741 |
| H  | 0.9238  | -0.5290 | -4.4557 |
| H  | 0.4483  | -1.9305 | -5.4757 |
| H  | 0.8628  | -2.1715 | -3.7417 |
| H  | -1.3986 | -3.2903 | -3.6154 |
| H  | -1.7549 | -2.8619 | -5.3161 |
| H  | -3.6962 | -1.4699 | -4.5925 |
| H  | -3.8872 | -3.1550 | -4.0351 |
| H  | -4.9572 | -1.0753 | -1.2226 |
| H  | -5.5222 | -2.0062 | -2.6506 |
| H  | -4.9606 | -0.3045 | -2.8459 |
| H  | 0.7676  | -3.7140 | 0.7496  |
| H  | 0.9602  | -4.0600 | 2.5071  |
| H  | 1.5748  | -2.5228 | 1.8137  |
| H  | -0.4102 | -2.9309 | 4.1296  |
| H  | 0.2081  | -1.3603 | 3.5373  |

|   |         |         |         |
|---|---------|---------|---------|
| H | -2.0039 | -1.0921 | 4.7128  |
| H | -2.7483 | -2.2551 | 3.5821  |
| H | -3.8367 | 0.9458  | 2.2772  |
| H | -3.9183 | 0.1986  | 3.9087  |
| H | -4.3398 | -0.7716 | 2.4495  |
| H | 2.3677  | 2.3948  | 0.8808  |
| H | 2.7237  | 3.9972  | 0.1459  |
| H | 2.4950  | 2.5546  | -0.8987 |
| H | 0.7369  | 3.9279  | -2.0728 |
| H | 0.9830  | 5.2666  | -0.9157 |
| H | -1.3770 | 5.0817  | -0.1366 |
| H | -1.3241 | 5.3787  | -1.8954 |
| H | -3.9298 | 2.8536  | -1.3884 |
| H | -3.6213 | 4.6137  | -1.5672 |
| H | -3.4713 | 3.8281  | 0.0492  |
| S | 0.5883  | 0.2370  | 1.1492  |
| S | -0.3232 | -2.1172 | -1.1743 |
| C | 5.4685  | 0.2112  | 0.6193  |
| C | 6.1203  | 0.4065  | -0.6121 |
| C | 5.7502  | 1.0034  | 1.7466  |
| C | 7.0835  | 1.4206  | -0.7055 |
| H | 5.8826  | -0.2224 | -1.4753 |
| C | 6.7229  | 2.0118  | 1.6364  |
| H | 5.2244  | 0.8342  | 2.6917  |
| C | 7.3849  | 2.2184  | 0.4154  |
| H | 7.6032  | 1.5866  | -1.6539 |
| H | 6.9587  | 2.6335  | 2.5051  |
| H | 8.1416  | 3.0047  | 0.3335  |
| C | 4.9481  | -2.4996 | 0.0738  |
| C | 5.9528  | -3.1572 | 0.8046  |
| C | 4.4915  | -2.9682 | -1.1652 |
| C | 6.5290  | -4.3130 | 0.2540  |
| H | 6.2847  | -2.7815 | 1.7780  |
| C | 5.0803  | -4.1279 | -1.6991 |
| H | 3.6929  | -2.4339 | -1.6875 |
| C | 6.0946  | -4.7962 | -0.9937 |
| H | 7.3150  | -4.8376 | 0.8055  |
| H | 4.7413  | -4.5068 | -2.6683 |
| H | 6.5462  | -5.7001 | -1.4135 |
| S | 4.1576  | -1.0306 | 0.8211  |
| O | 3.0068  | -0.6424 | -0.2333 |
| H | 1.8222  | -0.3061 | 0.3817  |
| H | 1.3698  | 0.1413  | -1.7394 |

**Stationary point: I2**

|  | x | y | z |
|--|---|---|---|
|--|---|---|---|

|    |         |         |         |
|----|---------|---------|---------|
| Mo | -1.4056 | -0.8021 | 0.9847  |
| Mo | -0.9024 | 1.7661  | 0.1299  |
| S  | -3.0250 | 0.7028  | 0.0904  |
| Mo | -1.6782 | -0.1880 | -1.6519 |
| Cl | -2.8689 | 1.3550  | -3.3171 |
| N  | 0.6552  | 3.4909  | 0.2447  |
| C  | 0.3442  | 4.4928  | -0.8159 |
| C  | -1.1447 | 4.7966  | -0.8063 |
| N  | -1.9465 | 3.5462  | -0.9581 |
| C  | -3.3837 | 3.8431  | -0.6938 |
| C  | 2.1174  | 3.2288  | 0.3090  |
| Cl | -1.6452 | 3.0090  | 2.2438  |
| S  | 0.3172  | 1.1514  | -1.8508 |
| N  | -1.1261 | -1.1555 | -3.7010 |
| C  | 0.2863  | -1.3571 | -4.1216 |
| N  | -3.4568 | -1.6194 | -2.0855 |
| C  | -4.8578 | -1.1835 | -1.8256 |
| C  | -1.9073 | -2.4166 | -3.8557 |
| C  | -3.3557 | -2.1666 | -3.4722 |
| N  | -0.4935 | -2.3752 | 2.4391  |
| C  | -0.5319 | -1.8345 | 3.8291  |
| C  | -1.8988 | -1.2322 | 4.1088  |
| N  | -2.2492 | -0.1980 | 3.0910  |
| C  | -3.6727 | 0.2087  | 3.2557  |
| Cl | -3.2769 | -2.5394 | 1.1589  |
| C  | 0.8051  | -3.0465 | 2.1770  |
| H  | -1.5438 | -0.4512 | -4.3309 |
| H  | -3.2505 | -2.3768 | -1.4113 |
| H  | -1.2366 | -3.0892 | 2.3624  |
| H  | -1.6793 | 0.6503  | 3.2568  |
| H  | 0.3694  | 3.8971  | 1.1508  |
| H  | -1.8983 | 3.2307  | -1.9427 |
| H  | 0.8032  | -0.3875 | -4.1372 |
| H  | 0.3301  | -1.8113 | -5.1280 |
| H  | 0.7868  | -2.0203 | -3.4003 |
| H  | -1.4454 | -3.1751 | -3.2003 |
| H  | -1.8523 | -2.7831 | -4.8984 |
| H  | -3.8020 | -1.4157 | -4.1473 |
| H  | -3.9456 | -3.0968 | -3.5647 |
| H  | -4.9825 | -0.9970 | -0.7512 |
| H  | -5.5702 | -1.9660 | -2.1450 |
| H  | -5.0507 | -0.2573 | -2.3872 |
| H  | 0.7892  | -3.4944 | 1.1742  |
| H  | 0.9979  | -3.8295 | 2.9328  |
| H  | 1.6099  | -2.2984 | 2.2262  |
| H  | -0.3184 | -2.6348 | 4.5629  |
| H  | 0.2624  | -1.0729 | 3.9100  |

|   |         |         |         |
|---|---------|---------|---------|
| H | -1.9272 | -0.8014 | 5.1265  |
| H | -2.6757 | -2.0144 | 4.0530  |
| H | -3.8564 | 1.1152  | 2.6647  |
| H | -3.8942 | 0.4157  | 4.3189  |
| H | -4.3182 | -0.6063 | 2.8957  |
| H | 2.3329  | 2.5831  | 1.1715  |
| H | 2.6773  | 4.1765  | 0.4085  |
| H | 2.4381  | 2.7174  | -0.6115 |
| H | 0.6612  | 4.0663  | -1.7834 |
| H | 0.9193  | 5.4236  | -0.6508 |
| H | -1.4307 | 5.2465  | 0.1603  |
| H | -1.3968 | 5.5205  | -1.6028 |
| H | -3.9927 | 2.9935  | -1.0298 |
| H | -3.6961 | 4.7529  | -1.2387 |
| H | -3.5217 | 3.9916  | 0.3873  |
| S | 0.5800  | 0.4205  | 1.4272  |
| S | -0.3591 | -1.9428 | -0.7886 |
| C | 5.5127  | 0.2172  | 1.1921  |
| C | 6.3611  | 0.4457  | 0.0895  |
| C | 5.5869  | 0.9891  | 2.3700  |
| C | 7.3088  | 1.4724  | 0.1836  |
| H | 6.2817  | -0.1641 | -0.8147 |
| C | 6.5476  | 2.0090  | 2.4437  |
| H | 4.9152  | 0.7910  | 3.2109  |
| C | 7.4030  | 2.2489  | 1.3550  |
| H | 7.9777  | 1.6668  | -0.6597 |
| H | 6.6263  | 2.6124  | 3.3525  |
| H | 8.1505  | 3.0454  | 1.4176  |
| C | 5.0033  | -2.4157 | 0.2965  |
| C | 6.2044  | -2.9236 | 0.8248  |
| C | 4.3439  | -3.0166 | -0.7865 |
| C | 6.7660  | -4.0613 | 0.2255  |
| H | 6.6983  | -2.4453 | 1.6756  |
| C | 4.9292  | -4.1515 | -1.3734 |
| H | 3.4087  | -2.5984 | -1.1650 |
| C | 6.1322  | -4.6727 | -0.8703 |
| H | 7.7031  | -4.4658 | 0.6187  |
| H | 4.4369  | -4.6247 | -2.2281 |
| H | 6.5784  | -5.5582 | -1.3325 |
| S | 4.2228  | -1.0271 | 1.1682  |
| O | 3.1248  | -0.5200 | -0.0153 |
| H | 2.2368  | -0.2889 | 0.4761  |
| H | 1.3022  | 0.2700  | -1.3672 |

**Stationary point: TS3**

|  | x | y | z |
|--|---|---|---|
|--|---|---|---|

|    |         |         |         |
|----|---------|---------|---------|
| Mo | -1.5683 | -0.9948 | 0.7198  |
| Mo | -0.8092 | 1.5399  | -0.0489 |
| S  | -2.9653 | 0.6049  | -0.3715 |
| Mo | -1.4685 | -0.3750 | -1.9385 |
| Cl | -2.3464 | 1.2233  | -3.7326 |
| N  | 0.8164  | 3.1612  | 0.2990  |
| C  | 0.7316  | 4.1774  | -0.7899 |
| C  | -0.7192 | 4.5772  | -0.9971 |
| N  | -1.5699 | 3.3793  | -1.2708 |
| C  | -3.0088 | 3.7686  | -1.2169 |
| C  | 2.2328  | 2.8065  | 0.5782  |
| Cl | -1.7715 | 2.8429  | 1.9292  |
| S  | 0.6047  | 0.8612  | -1.8835 |
| N  | -0.7266 | -1.3834 | -3.9002 |
| C  | 0.7153  | -1.6612 | -4.1396 |
| N  | -3.2586 | -1.6983 | -2.5842 |
| C  | -4.6518 | -1.1735 | -2.5063 |
| C  | -1.5500 | -2.6016 | -4.1500 |
| C  | -3.0191 | -2.2713 | -3.9441 |
| N  | -0.9077 | -2.6167 | 2.2532  |
| C  | -1.1017 | -2.0877 | 3.6359  |
| C  | -2.4586 | -1.4103 | 3.7460  |
| N  | -2.6215 | -0.3513 | 2.7057  |
| C  | -4.0297 | 0.1357  | 2.7013  |
| Cl | -3.5432 | -2.6161 | 0.6585  |
| C  | 0.3979  | -3.3195 | 2.1429  |
| H  | -1.0247 | -0.6615 | -4.5768 |
| H  | -3.1859 | -2.4550 | -1.8818 |
| H  | -1.6529 | -3.3104 | 2.0788  |
| H  | -2.0299 | 0.4616  | 2.9507  |
| H  | 0.4253  | 3.5877  | 1.1553  |
| H  | -1.3997 | 3.0601  | -2.2404 |
| H  | 1.2788  | -0.7185 | -4.0972 |
| H  | 0.8613  | -2.1302 | -5.1294 |
| H  | 1.0878  | -2.3376 | -3.3559 |
| H  | -1.2126 | -3.3819 | -3.4466 |
| H  | -1.3901 | -2.9743 | -5.1794 |
| H  | -3.3404 | -1.5074 | -4.6734 |
| H  | -3.6430 | -3.1702 | -4.0998 |
| H  | -4.8986 | -0.9615 | -1.4578 |
| H  | -5.3655 | -1.9163 | -2.9068 |
| H  | -4.7136 | -0.2460 | -3.0947 |
| H  | 0.4676  | -3.8079 | 1.1613  |
| H  | 0.4992  | -4.0775 | 2.9407  |
| H  | 1.2119  | -2.5854 | 2.2344  |
| H  | -1.0331 | -2.9074 | 4.3758  |
| H  | -0.2821 | -1.3770 | 3.8382  |



|   |         |         |         |
|---|---------|---------|---------|
| H | -2.5939 | -0.9842 | 4.7571  |
| H | -3.2639 | -2.1468 | 3.5805  |
| H | -4.0887 | 1.0540  | 2.1027  |
| H | -4.3652 | 0.3506  | 3.7324  |
| H | -4.6715 | -0.6401 | 2.2579  |
| H | 2.2763  | 2.1557  | 1.4619  |
| H | 2.8311  | 3.7173  | 0.7612  |
| H | 2.6516  | 2.2677  | -0.2847 |
| H | 1.1583  | 3.7264  | -1.7022 |
| H | 1.3357  | 5.0689  | -0.5360 |
| H | -1.1143 | 5.0511  | -0.0819 |
| H | -0.8048 | 5.3106  | -1.8198 |
| H | -3.6151 | 2.9560  | -1.6377 |
| H | -3.1801 | 4.6907  | -1.8020 |
| H | -3.2926 | 3.9381  | -0.1676 |
| S | 0.3885  | 0.1174  | 1.4293  |
| S | -0.4027 | -2.2059 | -0.9203 |
| C | 5.4318  | 0.2343  | 0.4413  |
| C | 5.8934  | 0.5154  | -0.8629 |
| C | 5.7053  | 1.0953  | 1.5267  |
| C | 6.6540  | 1.6729  | -1.0691 |
| H | 5.6610  | -0.1568 | -1.6932 |
| C | 6.4717  | 2.2474  | 1.2979  |
| H | 5.3343  | 0.8611  | 2.5291  |
| C | 6.9448  | 2.5355  | 0.0059  |
| H | 7.0211  | 1.9034  | -2.0736 |
| H | 6.7002  | 2.9173  | 2.1318  |
| H | 7.5421  | 3.4358  | -0.1665 |
| C | 5.0938  | -2.4903 | -0.2214 |
| C | 6.4842  | -2.7102 | -0.1729 |
| C | 4.2308  | -3.3436 | -0.9302 |
| C | 7.0163  | -3.8015 | -0.8765 |
| H | 7.1417  | -2.0455 | 0.3942  |
| C | 4.7862  | -4.4296 | -1.6271 |
| H | 3.1570  | -3.1456 | -0.9508 |
| C | 6.1716  | -4.6593 | -1.6019 |
| H | 8.0958  | -3.9773 | -0.8538 |
| H | 4.1272  | -5.0941 | -2.1939 |
| H | 6.5948  | -5.5074 | -2.1484 |
| S | 4.3971  | -1.1734 | 0.8075  |
| O | 2.8912  | -0.8839 | -0.1324 |
| H | 2.1606  | -0.6947 | 0.5509  |
| H | 1.5228  | -0.0436 | -1.3039 |

## 10.5.2 Optimized with PBE0 functional

Stationary point: H<sub>2</sub>

|   | x       | y      | z       |
|---|---------|--------|---------|
| H | 0.1401  | 2.5505 | -0.0642 |
| H | -0.6044 | 2.5505 | -0.0642 |

**Stationary point: H<sub>2</sub>O**

|   | x       | y      | z       |
|---|---------|--------|---------|
| O | -1.5085 | 2.5274 | -0.0642 |
| H | -0.5479 | 2.5790 | -0.0642 |
| H | -1.7805 | 3.4501 | -0.0642 |

**Stationary point: Diphenyl sulfoxide (1a)**

|   | x       | y       | z       |
|---|---------|---------|---------|
| C | -5.3056 | 1.9529  | 1.3084  |
| C | -4.2272 | 1.7371  | 0.4531  |
| C | -3.1647 | 2.6355  | 0.4796  |
| C | -3.1597 | 3.7476  | 1.3126  |
| C | -4.2456 | 3.9549  | 2.1594  |
| C | -5.3136 | 3.0577  | 2.1596  |
| H | -6.1429 | 1.2616  | 1.3036  |
| H | -4.2187 | 0.8835  | -0.2199 |
| H | -2.3148 | 4.4293  | 1.2769  |
| H | -4.2588 | 4.8179  | 2.8186  |
| H | -6.1593 | 3.2239  | 2.8202  |
| S | -1.7428 | 2.3839  | -0.6199 |
| O | -0.9746 | 3.7078  | -0.6134 |
| C | -0.8229 | 1.2746  | 0.4830  |
| C | -1.0613 | -0.0958 | 0.4399  |
| C | 0.1226  | 1.8322  | 1.3353  |
| C | -0.3429 | -0.9260 | 1.2977  |
| H | -1.7918 | -0.5128 | -0.2484 |
| C | 0.8376  | 0.9914  | 2.1840  |
| H | 0.2855  | 2.9059  | 1.3124  |
| C | 0.6024  | -0.3835 | 2.1676  |
| H | -0.5165 | -1.9977 | 1.2797  |
| H | 1.5799  | 1.4091  | 2.8579  |
| H | 1.1635  | -1.0360 | 2.8299  |

**Stationary point: Diphenyl sulfide (2a)**

|   | x       | y      | z      |
|---|---------|--------|--------|
| C | -4.9007 | 1.9405 | 0.2708 |
| C | -3.5197 | 2.0879 | 0.3455 |
| C | -2.9699 | 3.0487 | 1.2004 |
| C | -3.8067 | 3.8658 | 1.9640 |

|   |         |         |         |
|---|---------|---------|---------|
| C | -5.1899 | 3.7264  | 1.8643  |
| C | -5.7400 | 2.7616  | 1.0243  |
| H | -5.3229 | 1.1878  | -0.3888 |
| H | -2.8663 | 1.4564  | -0.2489 |
| H | -3.3773 | 4.6005  | 2.6390  |
| H | -5.8359 | 4.3653  | 2.4595  |
| H | -6.8178 | 2.6470  | 0.9573  |
| S | -1.2053 | 3.3218  | 1.2905  |
| C | -0.5619 | 1.6553  | 1.3625  |
| C | -1.1099 | 0.6970  | 2.2214  |
| C | 0.5515  | 1.3389  | 0.5809  |
| C | -0.5507 | -0.5749 | 2.2823  |
| H | -1.9738 | 0.9479  | 2.8295  |
| C | 1.1194  | 0.0688  | 0.6666  |
| H | 0.9654  | 2.0797  | -0.0970 |
| C | 0.5679  | -0.8916 | 1.5107  |
| H | -0.9841 | -1.3184 | 2.9450  |
| H | 1.9861  | -0.1717 | 0.0577  |
| H | 1.0051  | -1.8840 | 1.5671  |

**Stationary point: Cluster 5<sup>+</sup>**

|    | x       | y       | z       |
|----|---------|---------|---------|
| S  | -0.2049 | -2.0358 | -0.1943 |
| Mo | -1.3703 | -0.3988 | 0.9420  |
| S  | 0.3216  | 1.1421  | 1.0899  |
| Mo | -0.9237 | 1.7029  | -0.7711 |
| S  | -2.9147 | 0.4683  | -0.6003 |
| Mo | -1.3412 | -0.8217 | -1.7734 |
| Cl | -2.5569 | -0.1778 | -3.8730 |
| N  | 0.4996  | 3.4471  | -1.1128 |
| C  | 0.2243  | 4.0438  | -2.4367 |
| C  | -1.2640 | 4.1793  | -2.6408 |
| N  | -1.9317 | 2.8714  | -2.4774 |
| C  | -3.3974 | 3.0373  | -2.5098 |
| C  | 1.9508  | 3.2876  | -0.9087 |
| Cl | -2.0633 | 3.4996  | 0.5609  |
| S  | 0.3609  | 0.6314  | -2.3394 |
| N  | -0.4598 | -2.3179 | -3.2461 |
| C  | 0.9991  | -2.5012 | -3.3520 |
| N  | -2.9252 | -2.4894 | -1.8310 |
| C  | -4.3633 | -2.1594 | -1.8141 |
| C  | -1.1361 | -3.6210 | -3.0750 |
| C  | -2.6246 | -3.4146 | -2.9433 |
| N  | -0.5013 | -1.2173 | 2.8811  |
| C  | -0.8051 | -0.2786 | 3.9816  |
| C  | -2.2385 | 0.1809  | 3.8846  |

|    |         |         |         |
|----|---------|---------|---------|
| N  | -2.5044 | 0.7800  | 2.5602  |
| C  | -3.9434 | 1.0694  | 2.4100  |
| Cl | -3.1158 | -2.0947 | 1.5538  |
| C  | 0.9031  | -1.6598 | 2.9503  |
| H  | -0.7847 | -1.9192 | -4.1287 |
| H  | -2.7327 | -2.9699 | -0.9496 |
| H  | -1.0904 | -2.0416 | 3.0122  |
| H  | -2.0254 | 1.6817  | 2.5108  |
| H  | 0.1595  | 4.1022  | -0.4066 |
| H  | -1.6925 | 2.2841  | -3.2791 |
| H  | 1.4707  | -1.5516 | -3.6040 |
| H  | 1.2340  | -3.2381 | -4.1275 |
| H  | 1.3932  | -2.8497 | -2.3956 |
| H  | -0.7247 | -4.0961 | -2.1784 |
| H  | -0.9231 | -4.2754 | -3.9286 |
| H  | -3.0292 | -2.9666 | -3.8558 |
| H  | -3.1284 | -4.3749 | -2.7859 |
| H  | -4.6100 | -1.6851 | -0.8647 |
| H  | -4.9593 | -3.0724 | -1.9219 |
| H  | -4.5842 | -1.4782 | -2.6368 |
| H  | 1.0771  | -2.4446 | 2.2144  |
| H  | 1.1309  | -2.0453 | 3.9499  |
| H  | 1.5620  | -0.8173 | 2.7322  |
| H  | -0.6309 | -0.7598 | 4.9513  |
| H  | -0.1152 | 0.5676  | 3.8998  |
| H  | -2.4607 | 0.9018  | 4.6794  |
| H  | -2.9189 | -0.6683 | 3.9988  |
| H  | -4.0895 | 1.7196  | 1.5480  |
| H  | -4.3196 | 1.5754  | 3.3060  |
| H  | -4.4837 | 0.1333  | 2.2636  |
| H  | 2.1442  | 2.9679  | 0.1150  |
| H  | 2.4669  | 4.2357  | -1.0944 |
| H  | 2.3344  | 2.5302  | -1.5948 |
| H  | 0.6656  | 3.3903  | -3.1961 |
| H  | 0.7047  | 5.0260  | -2.5191 |
| H  | -1.6908 | 4.8568  | -1.8950 |
| H  | -1.4749 | 4.5926  | -3.6335 |
| H  | -3.8654 | 2.0611  | -2.6324 |
| H  | -3.6838 | 3.6785  | -3.3506 |
| H  | -3.7269 | 3.4909  | -1.5742 |

**Stationary point: TS1**

|    | x       | y       | z       |
|----|---------|---------|---------|
| Mo | -1.4172 | -0.4072 | 0.9192  |
| Mo | -0.9475 | 1.6740  | -0.7949 |
| S  | -2.9682 | 0.4805  | -0.5993 |

|    |         |         |         |
|----|---------|---------|---------|
| Mo | -1.3667 | -0.7698 | -1.7850 |
| Cl | -2.5600 | -0.1393 | -3.8747 |
| N  | 0.5029  | 3.4121  | -1.1331 |
| C  | 0.2251  | 4.0054  | -2.4560 |
| C  | -1.2635 | 4.1599  | -2.6380 |
| N  | -1.9464 | 2.8602  | -2.4641 |
| C  | -3.4092 | 3.0537  | -2.4652 |
| C  | 1.9534  | 3.2574  | -0.9264 |
| Cl | -1.9677 | 3.4557  | 0.6391  |
| S  | 0.4359  | 0.5894  | -2.2763 |
| N  | -0.4678 | -2.2814 | -3.2555 |
| C  | 0.9895  | -2.4390 | -3.4046 |
| N  | -2.9069 | -2.4770 | -1.7959 |
| C  | -4.3505 | -2.1700 | -1.7892 |
| C  | -1.1067 | -3.5943 | -3.0342 |
| C  | -2.5970 | -3.4193 | -2.8906 |
| N  | -0.5535 | -1.2304 | 2.8793  |
| C  | -0.8265 | -0.2641 | 3.9613  |
| C  | -2.2551 | 0.2062  | 3.8667  |
| N  | -2.5200 | 0.7901  | 2.5365  |
| C  | -3.9622 | 1.0641  | 2.3874  |
| Cl | -3.1052 | -2.1688 | 1.5137  |
| C  | 0.8320  | -1.7239 | 2.9638  |
| H  | -0.8269 | -1.9107 | -4.1369 |
| H  | -2.7128 | -2.9375 | -0.9025 |
| H  | -1.1726 | -2.0312 | 3.0196  |
| H  | -2.0501 | 1.6963  | 2.4794  |
| H  | 0.1629  | 4.0677  | -0.4273 |
| H  | -1.7303 | 2.2696  | -3.2715 |
| H  | 1.4339  | -1.4902 | -3.7039 |
| H  | 1.2138  | -3.1975 | -4.1624 |
| H  | 1.4233  | -2.7487 | -2.4517 |
| H  | -0.6726 | -4.0296 | -2.1279 |
| H  | -0.8872 | -4.2719 | -3.8679 |
| H  | -3.0193 | -2.9993 | -3.8091 |
| H  | -3.0788 | -4.3868 | -2.7095 |
| H  | -4.6092 | -1.6843 | -0.8494 |
| H  | -4.9327 | -3.0933 | -1.8856 |
| H  | -4.5771 | -1.5047 | -2.6238 |
| H  | 0.9771  | -2.5378 | 2.2534  |
| H  | 1.0446  | -2.0891 | 3.9742  |
| H  | 1.5262  | -0.9148 | 2.7274  |
| H  | -0.6456 | -0.7246 | 4.9399  |
| H  | -0.1276 | 0.5718  | 3.8507  |
| H  | -2.4707 | 0.9364  | 4.6550  |
| H  | -2.9400 | -0.6384 | 3.9933  |
| H  | -4.1157 | 1.7210  | 1.5319  |

|   |         |         |         |
|---|---------|---------|---------|
| H | -4.3485 | 1.5555  | 3.2875  |
| H | -4.4903 | 0.1227  | 2.2281  |
| H | 2.1459  | 2.9511  | 0.1018  |
| H | 2.4680  | 4.2046  | -1.1212 |
| H | 2.3405  | 2.4935  | -1.6030 |
| H | 0.6465  | 3.3406  | -3.2170 |
| H | 0.7173  | 4.9807  | -2.5505 |
| H | -1.6700 | 4.8417  | -1.8842 |
| H | -1.4869 | 4.5768  | -3.6263 |
| H | -3.8988 | 2.0891  | -2.5931 |
| H | -3.7003 | 3.7149  | -3.2887 |
| H | -3.7100 | 3.4970  | -1.5146 |
| S | 0.4215  | 0.9909  | 1.0018  |
| H | 1.4050  | -0.0053 | 0.1447  |
| S | -0.0687 | -1.9257 | -0.1964 |
| H | 1.2490  | -0.9471 | -0.2501 |

**Stationary point: I1**

|    | x       | y       | z       |
|----|---------|---------|---------|
| Mo | -0.0820 | -0.5818 | 1.4698  |
| Mo | 0.3830  | 1.4882  | -0.2513 |
| S  | -1.6393 | 0.3030  | -0.0373 |
| Mo | -0.0322 | -0.9355 | -1.2243 |
| Cl | -1.2145 | -0.2740 | -3.3075 |
| N  | 1.8243  | 3.2390  | -0.6138 |
| C  | 1.5370  | 3.8050  | -1.9452 |
| C  | 0.0468  | 3.9512  | -2.1146 |
| N  | -0.6315 | 2.6530  | -1.9112 |
| C  | -2.0934 | 2.8513  | -1.8952 |
| C  | 3.2765  | 3.1114  | -0.4054 |
| Cl | -0.6067 | 3.2661  | 1.2065  |
| S  | 1.8189  | 0.3897  | -1.6928 |
| N  | 0.8510  | -2.4411 | -2.7247 |
| C  | 2.3033  | -2.6187 | -2.8915 |
| N  | -1.5787 | -2.6382 | -1.2517 |
| C  | -3.0203 | -2.3228 | -1.2259 |
| C  | 0.1964  | -3.7499 | -2.5297 |
| C  | -1.2897 | -3.5595 | -2.3699 |
| N  | 0.7685  | -1.4005 | 3.4465  |
| C  | 0.4745  | -0.4384 | 4.5256  |
| C  | -0.9529 | 0.0264  | 4.4034  |
| N  | -1.1917 | 0.6177  | 3.0709  |
| C  | -2.6338 | 0.8840  | 2.9039  |
| Cl | -1.7315 | -2.3852 | 2.0290  |
| C  | 2.1536  | -1.8890 | 3.5542  |
| H  | 0.4915  | -2.0455 | -3.5950 |

|   |         |         |         |
|---|---------|---------|---------|
| H | -1.3827 | -3.1221 | -0.3704 |
| H | 0.1505  | -2.2040 | 3.5756  |
| H | -0.7293 | 1.5292  | 3.0339  |
| H | 1.4752  | 3.9010  | 0.0816  |
| H | -0.4260 | 2.0482  | -2.7124 |
| H | 2.7636  | -1.6668 | -3.1544 |
| H | 2.5085  | -3.3505 | -3.6805 |
| H | 2.7382  | -2.9774 | -1.9566 |
| H | 0.6307  | -4.2115 | -1.6367 |
| H | 0.4004  | -4.4111 | -3.3805 |
| H | -1.7147 | -3.1138 | -3.2750 |
| H | -1.7824 | -4.5247 | -2.2065 |
| H | -3.2685 | -1.8555 | -0.2742 |
| H | -3.6095 | -3.2400 | -1.3374 |
| H | -3.2489 | -1.6384 | -2.0445 |
| H | 2.3149  | -2.7001 | 2.8443  |
| H | 2.3500  | -2.2569 | 4.5671  |
| H | 2.8491  | -1.0766 | 3.3339  |
| H | 0.6388  | -0.9000 | 5.5067  |
| H | 1.1722  | 0.4004  | 4.4299  |
| H | -1.1893 | 0.7507  | 5.1911  |
| H | -1.6364 | -0.8222 | 4.5097  |
| H | -2.7803 | 1.5517  | 2.0557  |
| H | -3.0378 | 1.3595  | 3.8049  |
| H | -3.1517 | -0.0595 | 2.7233  |
| H | 3.4745  | 2.8344  | 0.6301  |
| H | 3.7764  | 4.0619  | -0.6222 |
| H | 3.6747  | 2.3381  | -1.0646 |
| H | 1.9532  | 3.1250  | -2.6957 |
| H | 2.0246  | 4.7802  | -2.0634 |
| H | -0.3535 | 4.6448  | -1.3679 |
| H | -0.1899 | 4.3502  | -3.1071 |
| H | -2.5891 | 1.8884  | -2.0085 |
| H | -2.3928 | 3.5068  | -2.7202 |
| H | -2.3794 | 3.3038  | -0.9440 |
| S | 1.7806  | 0.8904  | 1.6215  |
| H | 2.8016  | 0.2221  | 0.9807  |
| S | 1.2612  | -2.2059 | 0.3696  |
| H | 2.4952  | -1.6142 | 0.2053  |

**Stationary point: RC1**

|    | x       | y       | z       |
|----|---------|---------|---------|
| Mo | -1.7080 | -0.8445 | 1.1952  |
| Mo | -0.6391 | 1.5604  | 0.5274  |
| S  | -2.7305 | 0.7786  | -0.1681 |
| Mo | -1.0570 | -0.4048 | -1.3251 |

|    |         |         |         |
|----|---------|---------|---------|
| Cl | -1.4306 | 1.1460  | -3.2672 |
| N  | 1.0016  | 3.0645  | 1.1061  |
| C  | 1.1630  | 4.0392  | 0.0120  |
| C  | -0.1967 | 4.4945  | -0.4479 |
| N  | -1.0133 | 3.3379  | -0.8665 |
| C  | -2.3989 | 3.7802  | -1.1120 |
| C  | 2.3169  | 2.6231  | 1.5945  |
| Cl | -1.8114 | 2.9654  | 2.2544  |
| S  | 1.0404  | 0.7363  | -0.9610 |
| N  | -0.0165 | -1.5282 | -3.0410 |
| C  | 1.3856  | -1.9617 | -2.9497 |
| N  | -2.7520 | -1.5747 | -2.2861 |
| C  | -4.0767 | -0.9532 | -2.4697 |
| C  | -0.8778 | -2.6533 | -3.4493 |
| C  | -2.3042 | -2.1796 | -3.5579 |
| N  | -1.4581 | -2.4160 | 2.8602  |
| C  | -1.9045 | -1.8317 | 4.1400  |
| C  | -3.1926 | -1.0762 | 3.9375  |
| N  | -3.0316 | -0.0409 | 2.8968  |
| C  | -4.3414 | 0.5640  | 2.5893  |
| Cl | -3.7043 | -2.2901 | 0.7867  |
| C  | -0.1979 | -3.1535 | 3.0495  |
| H  | -0.0712 | -0.8174 | -3.7729 |
| H  | -2.8695 | -2.3187 | -1.5916 |
| H  | -2.1664 | -3.0911 | 2.5677  |
| H  | -2.4529 | 0.7157  | 3.2733  |
| H  | 0.5289  | 3.5413  | 1.8761  |
| H  | -0.6584 | 2.9987  | -1.7636 |
| H  | 2.0256  | -1.1002 | -2.7611 |
| H  | 1.7004  | -2.4456 | -3.8812 |
| H  | 1.4897  | -2.6685 | -2.1265 |
| H  | -0.7814 | -3.4394 | -2.6931 |
| H  | -0.5461 | -3.0653 | -4.4103 |
| H  | -2.3884 | -1.4070 | -4.3291 |
| H  | -2.9640 | -3.0087 | -3.8371 |
| H  | -4.5162 | -0.7482 | -1.4947 |
| H  | -4.7365 | -1.6291 | -3.0249 |
| H  | -3.9568 | -0.0201 | -3.0232 |
| H  | 0.0591  | -3.6847 | 2.1337  |
| H  | -0.2963 | -3.8720 | 3.8710  |
| H  | 0.6045  | -2.4522 | 3.2865  |
| H  | -2.0453 | -2.6174 | 4.8924  |
| H  | -1.1130 | -1.1643 | 4.4964  |
| H  | -3.5203 | -0.6228 | 4.8801  |
| H  | -3.9814 | -1.7556 | 3.5988  |
| H  | -4.1888 | 1.4765  | 2.0150  |
| H  | -4.8717 | 0.8095  | 3.5167  |



|   |         |         |         |
|---|---------|---------|---------|
| H | -4.9315 | -0.1453 | 2.0066  |
| H | 2.1944  | 2.0014  | 2.4812  |
| H | 2.9422  | 3.4869  | 1.8452  |
| H | 2.8171  | 2.0436  | 0.8180  |
| H | 1.7114  | 3.5471  | -0.7985 |
| H | 1.7574  | 4.8983  | 0.3465  |
| H | -0.7262 | 4.9849  | 0.3757  |
| H | -0.1054 | 5.2167  | -1.2674 |
| H | -2.9309 | 3.0065  | -1.6643 |
| H | -2.4043 | 4.7053  | -1.7003 |
| H | -2.8921 | 3.9521  | -0.1536 |
| S | 0.1780  | 0.1857  | 2.3000  |
| S | -0.3234 | -2.2070 | -0.0819 |
| C | 4.9303  | 0.4289  | 0.3974  |
| C | 4.5935  | 0.7825  | -0.9100 |
| C | 5.5421  | 1.3327  | 1.2630  |
| C | 4.8699  | 2.0721  | -1.3496 |
| H | 4.1284  | 0.0591  | -1.5724 |
| C | 5.8250  | 2.6197  | 0.8069  |
| H | 5.7886  | 1.0392  | 2.2795  |
| C | 5.4835  | 2.9883  | -0.4919 |
| H | 4.6109  | 2.3624  | -2.3633 |
| H | 6.3039  | 3.3332  | 1.4700  |
| H | 5.6982  | 3.9933  | -0.8421 |
| C | 5.0139  | -2.2332 | -0.2682 |
| C | 6.3513  | -2.2341 | -0.6607 |
| C | 4.0765  | -3.0793 | -0.8472 |
| C | 6.7454  | -3.0951 | -1.6801 |
| H | 7.0696  | -1.5645 | -0.1956 |
| C | 4.4855  | -3.9352 | -1.8693 |
| H | 3.0489  | -3.0491 | -0.4983 |
| C | 5.8147  | -3.9417 | -2.2850 |
| H | 7.7812  | -3.1020 | -2.0054 |
| H | 3.7627  | -4.5966 | -2.3380 |
| H | 6.1302  | -4.6092 | -3.0811 |
| S | 4.4590  | -1.1687 | 1.0839  |
| O | 2.9121  | -1.2440 | 1.0208  |
| H | 1.2518  | -0.5168 | 1.8070  |
| H | 1.7695  | -0.1788 | -0.2270 |

**Stationary point: TS2**

|    | x       | y       | z       |
|----|---------|---------|---------|
| Mo | -1.4712 | -1.0180 | 0.6931  |
| Mo | -0.6669 | 1.5229  | 0.0815  |
| S  | -2.7946 | 0.6406  | -0.3361 |
| Mo | -1.2355 | -0.2648 | -1.8443 |

|    |         |         |         |
|----|---------|---------|---------|
| Cl | -2.0434 | 1.3855  | -3.5709 |
| N  | 0.9412  | 3.1010  | 0.5535  |
| C  | 0.8632  | 4.1766  | -0.4504 |
| C  | -0.5791 | 4.5628  | -0.6519 |
| N  | -1.3784 | 3.3873  | -1.0463 |
| C  | -2.8101 | 3.7382  | -1.0298 |
| C  | 2.3403  | 2.7253  | 0.8006  |
| Cl | -1.6535 | 2.6949  | 2.1005  |
| S  | 0.8254  | 0.9693  | -1.7032 |
| N  | -0.3745 | -1.1563 | -3.7901 |
| C  | 1.0559  | -1.4712 | -3.9333 |
| N  | -2.9613 | -1.5323 | -2.6457 |
| C  | -4.3459 | -1.0340 | -2.5745 |
| C  | -1.2005 | -2.3158 | -4.1725 |
| C  | -2.6605 | -1.9704 | -4.0238 |
| N  | -0.8768 | -2.7067 | 2.1409  |
| C  | -1.1222 | -2.2575 | 3.5246  |
| C  | -2.4609 | -1.5693 | 3.6125  |
| N  | -2.5407 | -0.4480 | 2.6567  |
| C  | -3.9126 | 0.0887  | 2.6298  |
| Cl | -3.4422 | -2.5527 | 0.4916  |
| C  | 0.4246  | -3.3871 | 2.0487  |
| H  | -0.5891 | -0.3974 | -4.4392 |
| H  | -2.9032 | -2.3430 | -2.0242 |
| H  | -1.5981 | -3.3914 | 1.9088  |
| H  | -1.9370 | 0.3113  | 2.9841  |
| H  | 0.5597  | 3.4661  | 1.4282  |
| H  | -1.1544 | 3.1483  | -2.0154 |
| H  | 1.6452  | -0.5629 | -3.8049 |
| H  | 1.2591  | -1.8928 | -4.9245 |
| H  | 1.3477  | -2.1936 | -3.1684 |
| H  | -0.9279 | -3.1499 | -3.5174 |
| H  | -0.9918 | -2.6157 | -5.2071 |
| H  | -2.9210 | -1.1416 | -4.6901 |
| H  | -3.2847 | -2.8296 | -4.2957 |
| H  | -4.6432 | -0.9479 | -1.5305 |
| H  | -5.0263 | -1.7258 | -3.0849 |
| H  | -4.3941 | -0.0536 | -3.0521 |
| H  | 0.5342  | -3.8363 | 1.0621  |
| H  | 0.5031  | -4.1670 | 2.8149  |
| H  | 1.2268  | -2.6618 | 2.1910  |
| H  | -1.0957 | -3.1095 | 4.2154  |
| H  | -0.3133 | -1.5733 | 3.7997  |
| H  | -2.6387 | -1.2152 | 4.6350  |
| H  | -3.2624 | -2.2698 | 3.3560  |
| H  | -3.9119 | 1.0463  | 2.1115  |
| H  | -4.2839 | 0.2347  | 3.6511  |

|   |         |         |         |
|---|---------|---------|---------|
| H | -4.5589 | -0.6157 | 2.1032  |
| H | 2.3871  | 2.0285  | 1.6374  |
| H | 2.9432  | 3.6102  | 1.0354  |
| H | 2.7542  | 2.2452  | -0.0883 |
| H | 1.3049  | 3.8015  | -1.3800 |
| H | 1.4463  | 5.0487  | -0.1292 |
| H | -0.9997 | 4.9404  | 0.2861  |
| H | -0.6642 | 5.3572  | -1.4029 |
| H | -3.3725 | 2.9733  | -1.5640 |
| H | -2.9715 | 4.7065  | -1.5186 |
| H | -3.1511 | 3.7879  | 0.0058  |
| S | 0.4717  | 0.0535  | 1.5865  |
| S | -0.2377 | -2.1473 | -0.9028 |
| C | 4.8267  | 0.2326  | -0.0168 |
| C | 4.6809  | 0.2942  | -1.4028 |
| C | 5.4495  | 1.2415  | 0.7124  |
| C | 5.1766  | 1.4069  | -2.0710 |
| H | 4.1849  | -0.5080 | -1.9415 |
| C | 5.9496  | 2.3470  | 0.0251  |
| H | 5.5331  | 1.1745  | 1.7930  |
| C | 5.8083  | 2.4297  | -1.3577 |
| H | 5.0728  | 1.4771  | -3.1492 |
| H | 6.4376  | 3.1455  | 0.5744  |
| H | 6.1923  | 3.2959  | -1.8875 |
| C | 4.9170  | -2.5361 | 0.1630  |
| C | 6.2301  | -2.8018 | 0.5463  |
| C | 4.2266  | -3.3315 | -0.7452 |
| C | 6.8747  | -3.8962 | -0.0221 |
| H | 6.7448  | -2.1714 | 1.2661  |
| C | 4.8893  | -4.4248 | -1.2997 |
| H | 3.1979  | -3.0985 | -1.0003 |
| C | 6.2066  | -4.7040 | -0.9426 |
| H | 7.8988  | -4.1196 | 0.2596  |
| H | 4.3699  | -5.0585 | -2.0119 |
| H | 6.7153  | -5.5581 | -1.3787 |
| S | 4.0925  | -1.1190 | 0.9000  |
| O | 2.6377  | -1.2479 | 0.2732  |
| H | 1.7074  | -0.6802 | 0.8975  |
| H | 1.6751  | 0.0291  | -1.1793 |

**Stationary point: I2**

|    | x       | y       | z       |
|----|---------|---------|---------|
| Mo | -1.5416 | -0.8161 | 0.9192  |
| Mo | -0.7500 | 1.7141  | 0.3184  |
| S  | -2.9031 | 0.8614  | -0.0313 |
| Mo | -1.4163 | 0.0058  | -1.6323 |

|    |         |         |         |
|----|---------|---------|---------|
| Cl | -2.2999 | 1.7062  | -3.2871 |
| N  | 0.8864  | 3.2652  | 0.7766  |
| C  | 0.7890  | 4.3633  | -0.2000 |
| C  | -0.6538 | 4.7766  | -0.3401 |
| N  | -1.4875 | 3.6233  | -0.7261 |
| C  | -2.9118 | 3.9916  | -0.6453 |
| C  | 2.2861  | 2.8699  | 0.9794  |
| Cl | -1.6688 | 2.8606  | 2.4025  |
| S  | 0.6676  | 1.1853  | -1.5296 |
| N  | -0.6620 | -0.8447 | -3.6415 |
| C  | 0.7585  | -1.1539 | -3.8656 |
| N  | -3.1874 | -1.2490 | -2.3745 |
| C  | -4.5648 | -0.7497 | -2.2262 |
| C  | -1.5058 | -1.9974 | -4.0032 |
| C  | -2.9562 | -1.6555 | -3.7741 |
| N  | -0.9175 | -2.5394 | 2.3123  |
| C  | -1.1162 | -2.1167 | 3.7113  |
| C  | -2.4503 | -1.4292 | 3.8570  |
| N  | -2.5611 | -0.2935 | 2.9234  |
| C  | -3.9303 | 0.2474  | 2.9525  |
| Cl | -3.5378 | -2.3584 | 0.7546  |
| C  | 0.3681  | -3.2369 | 2.1709  |
| H  | -0.9126 | -0.0722 | -4.2610 |
| H  | -3.1010 | -2.0724 | -1.7742 |
| H  | -1.6565 | -3.2063 | 2.0835  |
| H  | -1.9399 | 0.4584  | 3.2345  |
| H  | 0.5306  | 3.6127  | 1.6692  |
| H  | -1.3068 | 3.3996  | -1.7078 |
| H  | 1.3524  | -0.2472 | -3.7490 |
| H  | 0.9111  | -1.5558 | -4.8741 |
| H  | 1.0894  | -1.8905 | -3.1306 |
| H  | -1.2006 | -2.8429 | -3.3777 |
| H  | -1.3494 | -2.2782 | -5.0525 |
| H  | -3.2467 | -0.8111 | -4.4081 |
| H  | -3.5944 | -2.5077 | -4.0369 |
| H  | -4.8120 | -0.6884 | -1.1675 |
| H  | -5.2723 | -1.4262 | -2.7206 |
| H  | -4.6321 | 0.2427  | -2.6762 |
| H  | 0.4751  | -3.6076 | 1.1516  |
| H  | 0.4311  | -4.0751 | 2.8747  |
| H  | 1.1797  | -2.5386 | 2.3803  |
| H  | -1.0668 | -2.9805 | 4.3862  |
| H  | -0.2982 | -1.4367 | 3.9706  |
| H  | -2.5923 | -1.0927 | 4.8911  |
| H  | -3.2609 | -2.1249 | 3.6165  |
| H  | -3.9425 | 1.2155  | 2.4543  |
| H  | -4.2685 | 0.3731  | 3.9881  |

|   |         |         |         |
|---|---------|---------|---------|
| H | -4.5957 | -0.4437 | 2.4320  |
| H | 2.3452  | 2.1609  | 1.8046  |
| H | 2.9076  | 3.7435  | 1.2089  |
| H | 2.6693  | 2.3934  | 0.0745  |
| H | 1.1907  | 4.0024  | -1.1532 |
| H | 1.3967  | 5.2202  | 0.1178  |
| H | -1.0321 | 5.1421  | 0.6206  |
| H | -0.7527 | 5.5881  | -1.0711 |
| H | -3.5044 | 3.2421  | -1.1687 |
| H | -3.0812 | 4.9703  | -1.1106 |
| H | -3.2100 | 4.0269  | 0.4041  |
| S | 0.4340  | 0.1936  | 1.6995  |
| S | -0.3968 | -1.9132 | -0.7740 |
| C | 4.7505  | 0.3085  | 0.4191  |
| C | 4.7461  | 0.3933  | -0.9742 |
| C | 5.2757  | 1.3100  | 1.2334  |
| C | 5.2885  | 1.5286  | -1.5623 |
| H | 4.3158  | -0.4011 | -1.5755 |
| C | 5.8290  | 2.4335  | 0.6228  |
| H | 5.2484  | 1.2206  | 2.3151  |
| C | 5.8289  | 2.5422  | -0.7657 |
| H | 5.2923  | 1.6231  | -2.6433 |
| H | 6.2462  | 3.2260  | 1.2350  |
| H | 6.2509  | 3.4250  | -1.2355 |
| C | 4.9645  | -2.4696 | 0.6702  |
| C | 6.3327  | -2.3137 | 0.4606  |
| C | 4.3245  | -3.7029 | 0.5516  |
| C | 7.0760  | -3.4340 | 0.0989  |
| H | 6.8109  | -1.3450 | 0.5621  |
| C | 5.0865  | -4.8064 | 0.1813  |
| H | 3.2571  | -3.7954 | 0.7184  |
| C | 6.4561  | -4.6735 | -0.0425 |
| H | 8.1415  | -3.3303 | -0.0779 |
| H | 4.6037  | -5.7716 | 0.0672  |
| H | 7.0424  | -5.5403 | -0.3302 |
| S | 3.9905  | -1.0766 | 1.2332  |
| O | 2.6520  | -1.3645 | 0.3418  |
| H | 1.8644  | -0.8776 | 0.7843  |
| H | 1.5159  | 0.2187  | -1.0393 |

**Stationary point: TS3**

|    | x       | y       | z       |
|----|---------|---------|---------|
| Mo | -1.5067 | -0.9649 | 0.8775  |
| Mo | -0.6010 | 1.4663  | 0.0722  |
| S  | -2.7151 | 0.5826  | -0.4334 |
| Mo | -1.0867 | -0.4876 | -1.7425 |

|    |         |         |         |
|----|---------|---------|---------|
| Cl | -1.7606 | 0.9938  | -3.6718 |
| N  | 1.0355  | 3.0103  | 0.5349  |
| C  | 1.0783  | 3.9989  | -0.5582 |
| C  | -0.3252 | 4.4155  | -0.9186 |
| N  | -1.1385 | 3.2394  | -1.2830 |
| C  | -2.5495 | 3.6349  | -1.4419 |
| C  | 2.3975  | 2.5998  | 0.9123  |
| Cl | -1.7422 | 2.8879  | 1.8341  |
| S  | 0.9535  | 0.7040  | -1.5426 |
| N  | -0.1282 | -1.5807 | -3.5255 |
| C  | 1.3036  | -1.9202 | -3.5391 |
| N  | -2.7879 | -1.8092 | -2.5277 |
| C  | -4.1621 | -1.2828 | -2.5997 |
| C  | -0.9459 | -2.7661 | -3.8424 |
| C  | -2.4068 | -2.3924 | -3.8291 |
| N  | -1.0492 | -2.4971 | 2.5221  |
| C  | -1.4167 | -1.9181 | 3.8289  |
| C  | -2.7573 | -1.2334 | 3.7315  |
| N  | -2.7488 | -0.2123 | 2.6668  |
| C  | -4.1067 | 0.3223  | 2.4666  |
| Cl | -3.4855 | -2.5203 | 0.6670  |
| C  | 0.2572  | -3.1685 | 2.6078  |
| H  | -0.2895 | -0.8896 | -4.2602 |
| H  | -2.7919 | -2.5510 | -1.8238 |
| H  | -1.7472 | -3.2068 | 2.2934  |
| H  | -2.1647 | 0.5734  | 2.9639  |
| H  | 0.6132  | 3.4655  | 1.3461  |
| H  | -0.8322 | 2.8994  | -2.1976 |
| H  | 1.8976  | -1.0105 | -3.4492 |
| H  | 1.5693  | -2.4326 | -4.4709 |
| H  | 1.5306  | -2.5724 | -2.6944 |
| H  | -0.7309 | -3.5310 | -3.0888 |
| H  | -0.6729 | -3.1726 | -4.8243 |
| H  | -2.6078 | -1.6350 | -4.5939 |
| H  | -3.0265 | -3.2688 | -4.0527 |
| H  | -4.5225 | -1.0842 | -1.5912 |
| H  | -4.8249 | -2.0123 | -3.0799 |
| H  | -4.1575 | -0.3565 | -3.1769 |
| H  | 0.4658  | -3.6861 | 1.6716  |
| H  | 0.2645  | -3.8901 | 3.4328  |
| H  | 1.0361  | -2.4230 | 2.7791  |
| H  | -1.4524 | -2.6990 | 4.5988  |
| H  | -0.6346 | -1.2045 | 4.1078  |
| H  | -3.0230 | -0.7819 | 4.6947  |
| H  | -3.5348 | -1.9603 | 3.4753  |
| H  | -4.0486 | 1.2270  | 1.8630  |
| H  | -4.5663 | 0.5646  | 3.4321  |

|   |         |         |         |
|---|---------|---------|---------|
| H | -4.7108 | -0.4264 | 1.9513  |
| H | 2.3580  | 1.9699  | 1.8007  |
| H | 3.0208  | 3.4774  | 1.1187  |
| H | 2.8498  | 2.0307  | 0.0979  |
| H | 1.5804  | 3.5312  | -1.4119 |
| H | 1.6667  | 4.8763  | -0.2618 |
| H | -0.8089 | 4.8887  | -0.0578 |
| H | -0.3099 | 5.1427  | -1.7391 |
| H | -3.0904 | 2.8324  | -1.9422 |
| H | -2.6241 | 4.5474  | -2.0453 |
| H | -2.9818 | 3.8102  | -0.4554 |
| S | 0.3461  | 0.1394  | 1.7477  |
| S | -0.2232 | -2.2694 | -0.5428 |
| C | 5.1874  | 0.1501  | 0.4312  |
| C | 5.2603  | 0.6318  | -0.8812 |
| C | 5.5967  | 0.9285  | 1.5191  |
| C | 5.7688  | 1.9058  | -1.0978 |
| H | 4.9177  | 0.0227  | -1.7114 |
| C | 6.0971  | 2.2050  | 1.2821  |
| H | 5.5234  | 0.5424  | 2.5313  |
| C | 6.1846  | 2.6924  | -0.0209 |
| H | 5.8338  | 2.2896  | -2.1111 |
| H | 6.4196  | 2.8169  | 2.1182  |
| H | 6.5763  | 3.6887  | -0.2000 |
| C | 4.8713  | -2.4647 | -0.5414 |
| C | 6.1901  | -2.4911 | -0.9997 |
| C | 3.9025  | -3.3344 | -1.0460 |
| C | 6.5328  | -3.3945 | -2.0009 |
| H | 6.9339  | -1.8141 | -0.5918 |
| C | 4.2678  | -4.2348 | -2.0428 |
| H | 2.8811  | -3.2804 | -0.6844 |
| C | 5.5762  | -4.2646 | -2.5218 |
| H | 7.5525  | -3.4157 | -2.3720 |
| H | 3.5203  | -4.9083 | -2.4508 |
| H | 5.8512  | -4.9655 | -3.3037 |
| S | 4.4309  | -1.3936 | 0.8130  |
| O | 2.6981  | -1.0091 | 0.1382  |
| H | 2.1058  | -0.9012 | 0.9247  |
| H | 1.8172  | -0.2074 | -0.8211 |

**Stationary point: <sup>3</sup>TS1**

|    | x       | y       | z       |
|----|---------|---------|---------|
| Mo | -1.4007 | -0.3824 | 0.8979  |
| Mo | -0.9722 | 1.8095  | -0.7099 |
| S  | -2.9609 | 0.5004  | -0.6691 |
| Mo | -1.4123 | -0.8683 | -1.8093 |

|    |         |         |         |
|----|---------|---------|---------|
| Cl | -2.6432 | -0.2261 | -3.9094 |
| N  | 0.5387  | 3.4643  | -1.1253 |
| C  | 0.2371  | 4.0670  | -2.4419 |
| C  | -1.2523 | 4.2580  | -2.5898 |
| N  | -1.9615 | 2.9726  | -2.4201 |
| C  | -3.4200 | 3.1938  | -2.4072 |
| C  | 1.9867  | 3.2275  | -0.9764 |
| Cl | -1.9139 | 3.5506  | 0.7286  |
| S  | 0.2487  | 0.6455  | -2.3191 |
| N  | -0.4917 | -2.3488 | -3.2620 |
| C  | 0.9735  | -2.4406 | -3.4041 |
| N  | -2.8910 | -2.6045 | -1.8003 |
| C  | -4.3365 | -2.2979 | -1.7940 |
| C  | -1.0787 | -3.6858 | -3.0343 |
| C  | -2.5730 | -3.5523 | -2.8875 |
| N  | -0.5651 | -1.2259 | 2.8610  |
| C  | -0.8637 | -0.2806 | 3.9556  |
| C  | -2.2900 | 0.1931  | 3.8420  |
| N  | -2.5212 | 0.8060  | 2.5187  |
| C  | -3.9547 | 1.1052  | 2.3408  |
| Cl | -3.1299 | -2.1174 | 1.4949  |
| C  | 0.8231  | -1.7084 | 2.9628  |
| H  | -0.8664 | -1.9961 | -4.1454 |
| H  | -2.6905 | -3.0539 | -0.9029 |
| H  | -1.1801 | -2.0334 | 2.9772  |
| H  | -2.0353 | 1.7048  | 2.4944  |
| H  | 0.2698  | 4.1433  | -0.4120 |
| H  | -1.7621 | 2.3844  | -3.2309 |
| H  | 1.3748  | -1.4707 | -3.6979 |
| H  | 1.2329  | -3.1852 | -4.1640 |
| H  | 1.4146  | -2.7332 | -2.4495 |
| H  | -0.6278 | -4.0992 | -2.1262 |
| H  | -0.8354 | -4.3552 | -3.8675 |
| H  | -3.0091 | -3.1488 | -3.8069 |
| H  | -3.0318 | -4.5279 | -2.6926 |
| H  | -4.5862 | -1.7712 | -0.8739 |
| H  | -4.9160 | -3.2263 | -1.8435 |
| H  | -4.5706 | -1.6708 | -2.6550 |
| H  | 0.9876  | -2.5103 | 2.2432  |
| H  | 1.0204  | -2.0860 | 3.9718  |
| H  | 1.5128  | -0.8895 | 2.7487  |
| H  | -0.7019 | -0.7602 | 4.9282  |
| H  | -0.1638 | 0.5579  | 3.8746  |
| H  | -2.5192 | 0.9093  | 4.6393  |
| H  | -2.9801 | -0.6509 | 3.9369  |
| H  | -4.0802 | 1.7730  | 1.4888  |
| H  | -4.3528 | 1.5944  | 3.2368  |



|   |         |         |         |
|---|---------|---------|---------|
| H | -4.4946 | 0.1742  | 2.1615  |
| H | 2.2013  | 2.9144  | 0.0451  |
| H | 2.5450  | 4.1429  | -1.1995 |
| H | 2.3000  | 2.4392  | -1.6631 |
| H | 0.6234  | 3.3932  | -3.2136 |
| H | 0.7526  | 5.0287  | -2.5464 |
| H | -1.6267 | 4.9401  | -1.8197 |
| H | -1.4820 | 4.6963  | -3.5676 |
| H | -3.9280 | 2.2389  | -2.5406 |
| H | -3.7087 | 3.8685  | -3.2207 |
| H | -3.7094 | 3.6318  | -1.4504 |
| S | 0.4140  | 1.0132  | 1.0486  |
| H | 1.4759  | -0.0753 | 0.1308  |
| S | -0.0984 | -1.9572 | -0.1730 |
| H | 1.3306  | -0.9237 | -0.2067 |

**Stationary point: <sup>3</sup>I1**

|    | x       | y       | z       |
|----|---------|---------|---------|
| Mo | -0.0904 | -0.6182 | 1.5224  |
| Mo | 0.3864  | 1.5799  | -0.2262 |
| S  | -1.5961 | 0.3076  | -0.0275 |
| Mo | -0.0138 | -0.9611 | -1.2295 |
| Cl | -1.2723 | -0.3142 | -3.2770 |
| N  | 1.8139  | 3.3117  | -0.6361 |
| C  | 1.5331  | 3.8403  | -1.9840 |
| C  | 0.0423  | 3.9733  | -2.1599 |
| N  | -0.6238 | 2.6723  | -1.9419 |
| C  | -2.0859 | 2.8649  | -1.9071 |
| C  | 3.2632  | 3.1640  | -0.4212 |
| Cl | -0.5735 | 3.3376  | 1.2870  |
| S  | 1.7412  | 0.3986  | -1.7294 |
| N  | 0.8586  | -2.4373 | -2.7563 |
| C  | 2.3121  | -2.6137 | -2.9157 |
| N  | -1.5540 | -2.6878 | -1.2581 |
| C  | -2.9956 | -2.3739 | -1.1992 |
| C  | 0.2028  | -3.7521 | -2.6019 |
| C  | -1.2813 | -3.5721 | -2.4098 |
| N  | 0.7491  | -1.4333 | 3.4949  |
| C  | 0.4636  | -0.4590 | 4.5661  |
| C  | -0.9518 | 0.0374  | 4.4257  |
| N  | -1.1640 | 0.6331  | 3.0885  |
| C  | -2.5991 | 0.9322  | 2.9063  |
| Cl | -1.7404 | -2.3903 | 2.0370  |
| C  | 2.1357  | -1.9195 | 3.5953  |
| H  | 0.5055  | -2.0190 | -3.6187 |
| H  | -1.3460 | -3.2044 | -0.4006 |

|   |         |         |         |
|---|---------|---------|---------|
| H | 0.1337  | -2.2360 | 3.6391  |
| H | -0.6839 | 1.5362  | 3.0535  |
| H | 1.4727  | 3.9979  | 0.0397  |
| H | -0.4237 | 2.0663  | -2.7409 |
| H | 2.7796  | -1.6531 | -3.1303 |
| H | 2.5243  | -3.3117 | -3.7331 |
| H | 2.7350  | -3.0158 | -1.9930 |
| H | 0.6506  | -4.2486 | -1.7349 |
| H | 0.3932  | -4.3796 | -3.4809 |
| H | -1.7238 | -3.1005 | -3.2925 |
| H | -1.7665 | -4.5447 | -2.2683 |
| H | -3.2219 | -1.9029 | -0.2441 |
| H | -3.5859 | -3.2923 | -1.2959 |
| H | -3.2430 | -1.6916 | -2.0136 |
| H | 2.2919  | -2.7359 | 2.8903  |
| H | 2.3418  | -2.2796 | 4.6092  |
| H | 2.8275  | -1.1074 | 3.3635  |
| H | 0.6072  | -0.9176 | 5.5518  |
| H | 1.1791  | 0.3645  | 4.4717  |
| H | -1.1815 | 0.7692  | 5.2083  |
| H | -1.6561 | -0.7950 | 4.5254  |
| H | -2.7217 | 1.5926  | 2.0490  |
| H | -2.9955 | 1.4285  | 3.7992  |
| H | -3.1389 | -0.0006 | 2.7345  |
| H | 3.4538  | 2.9167  | 0.6233  |
| H | 3.7840  | 4.0956  | -0.6698 |
| H | 3.6452  | 2.3599  | -1.0529 |
| H | 1.9539  | 3.1403  | -2.7137 |
| H | 2.0192  | 4.8131  | -2.1279 |
| H | -0.3616 | 4.6719  | -1.4192 |
| H | -0.1958 | 4.3639  | -3.1559 |
| H | -2.5786 | 1.8974  | -1.9942 |
| H | -2.4054 | 3.5050  | -2.7376 |
| H | -2.3600 | 3.3307  | -0.9587 |
| S | 1.7663  | 0.9428  | 1.6818  |
| H | 2.7790  | 0.2254  | 1.1396  |
| S | 1.1635  | -2.3631 | 0.3905  |
| H | 2.4225  | -1.8973 | 0.2294  |

**Stationary point: <sup>3</sup>I2**

|    | x       | y       | z       |
|----|---------|---------|---------|
| Mo | -1.5335 | -0.8642 | 1.1270  |
| Mo | -0.7081 | 1.7454  | 0.4241  |
| S  | -2.7917 | 0.7568  | -0.0416 |
| Mo | -1.1948 | -0.1671 | -1.5148 |
| Cl | -1.9609 | 1.4769  | -3.2886 |

|    |         |         |         |
|----|---------|---------|---------|
| N  | 0.8519  | 3.3499  | 0.9312  |
| C  | 0.7815  | 4.4362  | -0.0630 |
| C  | -0.6612 | 4.7749  | -0.3381 |
| N  | -1.3952 | 3.5754  | -0.7852 |
| C  | -2.8374 | 3.8742  | -0.8610 |
| C  | 2.2510  | 2.9894  | 1.1997  |
| Cl | -1.8375 | 2.9320  | 2.3490  |
| S  | 0.7747  | 1.2625  | -1.4398 |
| N  | -0.2926 | -1.0882 | -3.4134 |
| C  | 1.1410  | -1.4071 | -3.5030 |
| N  | -2.9132 | -1.4085 | -2.3409 |
| C  | -4.2917 | -0.8895 | -2.3222 |
| C  | -1.1139 | -2.2518 | -3.7939 |
| C  | -2.5758 | -1.8922 | -3.6952 |
| N  | -0.9535 | -2.5085 | 2.6091  |
| C  | -1.2406 | -2.0376 | 3.9760  |
| C  | -2.5972 | -1.3793 | 4.0045  |
| N  | -2.6564 | -0.2738 | 3.0311  |
| C  | -4.0385 | 0.2207  | 2.9182  |
| Cl | -3.4361 | -2.5327 | 0.7570  |
| C  | 0.3699  | -3.1458 | 2.5471  |
| H  | -0.4859 | -0.3415 | -4.0830 |
| H  | -2.8919 | -2.1957 | -1.6869 |
| H  | -1.6516 | -3.2154 | 2.3715  |
| H  | -2.0840 | 0.5005  | 3.3739  |
| H  | 0.4480  | 3.7004  | 1.8018  |
| H  | -1.1021 | 3.3503  | -1.7384 |
| H  | 1.7267  | -0.4970 | -3.3699 |
| H  | 1.3783  | -1.8453 | -4.4793 |
| H  | 1.4060  | -2.1158 | -2.7160 |
| H  | -0.8659 | -3.0729 | -3.1137 |
| H  | -0.8783 | -2.5754 | -4.8156 |
| H  | -2.8116 | -1.0825 | -4.3938 |
| H  | -3.1991 | -2.7550 | -3.9573 |
| H  | -4.6164 | -0.7787 | -1.2886 |
| H  | -4.9642 | -1.5859 | -2.8367 |
| H  | -4.3152 | 0.0805  | -2.8220 |
| H  | 0.5134  | -3.5971 | 1.5654  |
| H  | 0.4656  | -3.9172 | 3.3205  |
| H  | 1.1401  | -2.3877 | 2.7002  |
| H  | -1.2104 | -2.8715 | 4.6890  |
| H  | -0.4568 | -1.3242 | 4.2516  |
| H  | -2.8284 | -1.0212 | 5.0153  |
| H  | -3.3694 | -2.1025 | 3.7201  |
| H  | -4.0359 | 1.1677  | 2.3800  |
| H  | -4.4762 | 0.3737  | 3.9125  |
| H  | -4.6317 | -0.5116 | 2.3667  |

|   |         |         |         |
|---|---------|---------|---------|
| H | 2.2895  | 2.2675  | 2.0152  |
| H | 2.8364  | 3.8762  | 1.4698  |
| H | 2.6900  | 2.5408  | 0.3059  |
| H | 1.2811  | 4.0889  | -0.9739 |
| H | 1.3169  | 5.3245  | 0.2951  |
| H | -1.1454 | 5.1273  | 0.5784  |
| H | -0.7323 | 5.5733  | -1.0866 |
| H | -3.3396 | 3.0735  | -1.4018 |
| H | -3.0029 | 4.8232  | -1.3852 |
| H | -3.2385 | 3.9398  | 0.1519  |
| S | 0.3712  | 0.3090  | 1.9892  |
| S | -0.2588 | -1.9713 | -0.5153 |
| C | 4.7834  | 0.4138  | 0.3524  |
| C | 4.7790  | 0.5232  | -1.0401 |
| C | 5.3240  | 1.3958  | 1.1805  |
| C | 5.3356  | 1.6599  | -1.6111 |
| H | 4.3474  | -0.2594 | -1.6572 |
| C | 5.8882  | 2.5236  | 0.5878  |
| H | 5.2993  | 1.2878  | 2.2605  |
| C | 5.8878  | 2.6548  | -0.7987 |
| H | 5.3428  | 1.7704  | -2.6906 |
| H | 6.3176  | 3.3002  | 1.2119  |
| H | 6.3219  | 3.5389  | -1.2550 |
| C | 4.6428  | -2.3703 | 0.2884  |
| C | 6.0263  | -2.5385 | 0.2939  |
| C | 3.7757  | -3.2889 | -0.2963 |
| C | 6.5544  | -3.6653 | -0.3276 |
| H | 6.6820  | -1.8058 | 0.7551  |
| C | 4.3290  | -4.4084 | -0.9152 |
| H | 2.7035  | -3.1234 | -0.2837 |
| C | 5.7088  | -4.5964 | -0.9305 |
| H | 7.6295  | -3.8115 | -0.3420 |
| H | 3.6721  | -5.1325 | -1.3867 |
| H | 6.1295  | -5.4717 | -1.4153 |
| S | 3.9626  | -0.9494 | 1.1471  |
| O | 2.4929  | -0.9446 | 0.4728  |
| H | 1.7640  | -0.5041 | 1.1153  |
| H | 1.6996  | 0.4327  | -0.8999 |

## 11. References

- [1] W. Corporation, *ReVision* **2005**, 94.
- [2] X. Li, Y. Sun, X. Huang, L. Zhang, L. Kong, B. Peng, *Org. Lett.* **2017**, *19*, 838–841.
- [3] A. García-Rubia, M. Á. Fernández-Ibáñez, R. Gómez Arrayás, J. C. Carretero, *Chem. – A*

- [4] F. Shi, M. K. Tse, H. M. Kaiser, M. Beller, *Adv. Synth. Catal.* **2007**, *349*, 2425–2430.
- [5] M. J. Frisch, G. W. Trucks, H. B. Schlegel, G. E. Scuseria, M. A. Robb, J. R. Cheeseman, G. Scalmani, V. Barone, B. Mennucci, G. A. Petersson, H. Nakatsuji, M. Caricato, X. Li, H. P. Hratchian, A. F. Izmaylov, J. Bloino, G. Zheng, J. L. Sonnenberg, M. Hada, M. Ehara, K. Toyota, R. Fukuda, J. Hasegawa, M. Ishida, T. Nakajima, Y. Honda, O. Kitao, H. Nakai, T. Vreven, J. A. Montgomery, J. J. E. Peralta, F. Ogliaro, M. Bearpark, J. J. Heyd, E. Brothers, K. N. Kudin, V. N. Staroverov, T. Keith, R. Kobayashi, J. Normand, K. Raghavachari, A. Rendell, J. C. Burant, S. S. Iyengar, J. Tomasi, M. Cossi, N. Rega, J. M. Millam, M. Klene, J. E. Knox, J. B. Cross, V. Bakken, C. Adamo, J. Jaramillo, R. Gomperts, R. E. Stratmann, O. Yazyev, A. J. Austin, R. Cammi, C. Pomelli, J. W. Ochterski, R. L. Martin, K. Morokuma, V. G. Zakrzewski, G. A. Voth, P. Salvador, J. J. Dannenberg, S. Dapprich, A. D. Daniels, O. Farkas, J. B. Foresman, J. V. Ortiz, J. Cioslowski, D. J. Fox, *Gaussian 09*, Revision D.01. Gaussian, Inc., Wallingford CT, 2013.
- [6] M. J. Frisch, G. W. Trucks, H. B. Schlegel, G. E. Scuseria, M. A. Robb, J. R. Cheeseman, G. Scalmani, V. Barone, G. A. Petersson, H. Nakatsuji, X. Li, M. Caricato, A. V. Marenich, J. Bloino, B. G. Janesko, R. Gomperts, B. Mennucci, H. P. Hratchian, J. V. Ortiz, A. F. Izmaylov, J. L. Sonnenberg, D. Williams-Young, F. Ding, F. Lipparini, F. Egidi, J. Goings, B. Peng, A. Petrone, T. Henderson, D. Ranasinghe, V. G. Zakrzewski, J. Gao, N. Rega, G. Zheng, W. Liang, M. Hada, M. Ehara, K. Toyota, R. Fukuda, J. Hasegawa, M. Ishida, T. Nakajima, Y. Honda, O. Kitao, H. Nakai, T. Vreven, K. Throssell, J. A. Montgomery Jr., J. E. Peralta, F. Ogliaro, M. J. Bearpark, J. J. Heyd, E. N. Brothers, K. N. Kudin, V. N. Staroverov, T. a. Keith, R. Kobayashi, J. Normand, K. Raghavachari, A. P. Rendell, J. C. Burant, S. S. Iyengar, J. Tomasi, M. Cossi, J. M. Millam, M. Klene, C. Adamo, R. Cammi, J. W. Ochterski, R. L. Martin, K. Morokuma, O. Farkas, J. B. Foresman, D. J. Fox, *Gaussian 16*, Revision C.02. Gaussian, Inc., Wallingford CT, 2019.
- [7] J. P. Perdew, *Phys. Rev. B* **1986**, *33*, 8822–8824.
- [8] A. D. Becke, *Phys. Rev. A* **1988**, *38*, 3098–3100.
- [9] C. Adamo, V. Barone, *J. Chem. Phys.* **1999**, *110*, 6158–6170.
- [10] D. Andrae, U. Häubermann, M. Dolg, H. Stoll, H. Preub, *Theor. Chim. Acta* **1990**, *77*, 123–141.
- [11] A. Höllwarth, M. Böhme, S. Dapprich, A. W. Ehlers, A. Gobbi, V. Jonas, K. F. Köhler, R.

- Stegmann, A. Veldkamp, G. Frenking, *Chem. Phys. Lett.* **1993**, *208*, 237–240.
- [12] W. J. Hehre, R. Ditchfield, J. A. Pople, *J. Chem. Phys.* **1972**, *56*, 2257–2261.
- [13] P. C. Hariharan, J. A. Pople, *Theor. Chim. Acta* **1973**, *28*, 213–222.
- [14] M. Cossi, G. Scalmani, N. Rega, V. Barone, *J. Chem. Phys.* **2002**, *117*, 43–54.
- [15] J. Tomasi, B. Mennucci, R. Cammi, *Chem. Rev.* **2005**, *105*, 2999–3094.
- [16] S. Grimme, J. Antony, S. Ehrlich, H. Krieg, *J. Chem. Phys.* **2010**, *132*, 154104.
- [17] K. Momma, F. Izumi, *J. Appl. Crystallogr.* **2011**, *44*, 1272–1276.
